# Supplementary material for: Long covid outcomes at one year after mild SARS-CoV-2 infection: nationwide cohort study
Source: PubMed Central journal article supplement — BMJ. 2023 Jan 11;380:e072529. doi: 10.1136/bmj-2022-072529 (PMC9832503; doi:10.1136/bmj-2022-072529), 2023-01-11
Supplement: mizb072529.ww1.pdf [file mizb072529.ww1.pdf]

# Long COVID outcomes one year post mild SARS-CoV-2 infection in a nationwide study

Barak Mizrahi <sup>1,#</sup>, Tamar Sudry <sup>1</sup>, Natalie Flaks-Manov <sup>1</sup>, Yoav Yehezkelli <sup>1</sup>, Nir Kalkstein <sup>1</sup>, Pinchas Akiva <sup>1</sup>, Anat Ekka-Zohar PhD <sup>2</sup>, Shirley Shapiro Ben David MD <sup>2</sup>, Uri Lerner PhD <sup>2</sup>, Maytal Bivas-Benita PhD <sup>1,§</sup> and Shira Greenfeld MD <sup>2,§</sup>

<sup>1</sup> KI Research Institute, Kfar-Malal, Israel

<sup>2</sup> Maccabi Healthcare Services, Tel-Aviv, Israel

# Corresponding author: Barak Mizrahi, KI Research Institute, 11 Hazayit st, Kfar Malal, Israel.

§ These authors contributed equally to this work

Email: [barak@kinstitute.org.il](mailto:barak@kinstitute.org.il)

## SUPPLEMENTARY MATERIALS

### Contents

|                                                                                                                                                                                                                                |    |
|--------------------------------------------------------------------------------------------------------------------------------------------------------------------------------------------------------------------------------|----|
| Table S1 – List of health outcomes included in the study .....                                                                                                                                                                 | 5  |
| Figure S1: Daily numbers of SARS-CoV-2 infected individuals in Israel, by the dominance of the COVID-19 strain. ....                                                                                                           | 9  |
| Table S2a - Characteristics of the sub cohort of unvaccinated individuals during Wild-Type and Alpha variants of the SARS-CoV-2 virus for all age groups .....                                                                 | 10 |
| Table S2b – Association of health outcomes with SARS-CoV-2 infection in unvaccinated individuals during Wild-Type and Alpha variants, 30-180 days post PCR test .....                                                          | 11 |
| Table S2c - Association of health outcomes with SARS-CoV-2 infection in unvaccinated individuals during Wild-Type and Alpha variants, 180-360 days post PCR test .....                                                         | 14 |
| Table S2d - Risk difference of health outcomes in unvaccinated individuals, 30-360 days post-PCR test and evaluation of recurring reports .....                                                                                | 17 |
| Figure S2 – Monthly hazard ratio (HR) of fatty liver and AST, ALT glucose and hemoglobin blood tests for COVID-19 patients .....                                                                                               | 19 |
| Table S2e - Association of health outcomes with SARS-CoV-2 infection in unvaccinated individuals, during Wild-Type and Alpha variants, monthly after PCR test.....                                                             | 20 |
| Table S3 - Respiratory related outcomes associated with SARS-CoV-2 infection in unvaccinated individuals, from all age groups, during Wild-Type and Alpha variants, 30-360 days post PCR test, by medication prescription..... | 21 |
| Table S4a - Association of health outcomes with SARS-CoV-2 infection in unvaccinated individuals during Wild-Type and Alpha variants, 30-180 days post-infection, ages 0-4 .....                                               | 22 |
| Table S4b - Association of health outcomes with SARS-CoV-2 infection in unvaccinated individuals during Wild-Type and Alpha variants, 30-180 days post-infection, ages 5-11 .....                                              | 24 |
| Table S4c - Association of health outcomes with SARS-CoV-2 infection in unvaccinated individuals during Wild-Type and Alpha variants, 30-180 days post-infection, ages 12-18 .....                                             | 26 |
| Table S4d – Association of health outcomes with SARS-CoV-2 infection in unvaccinated individuals during Wild-Type and Alpha variants, 30-180 days post PCR test, age 19-40 years.....                                          | 28 |
| Table S4e – Association of health outcomes with SARS-CoV-2 infection in unvaccinated individuals during Wild-Type and Alpha variants, 30-180 days post PCR test, age 41- 60 years.....                                         | 31 |
| Table S4f - Association of health outcomes with SARS-CoV-2 infection in unvaccinated individuals during Wild-Type and Alpha variants, 30-180 days post PCR test, age >60 years.....                                            | 34 |

|                                                                                                                                                                                                   |    |
|---------------------------------------------------------------------------------------------------------------------------------------------------------------------------------------------------|----|
| Table S4g– Association of health outcomes with SARS-CoV-2 infection in unvaccinated individuals during Wild-Type and Alpha variants, 180-360 days post PCR test, age 0-4 years.....               | 36 |
| Table S4h– Association of health outcomes with SARS-CoV-2 infection in unvaccinated individuals during Wild-Type and Alpha variants, 180-360 days post PCR test, age 5-11 years.....              | 38 |
| Table S4i– Association of health outcomes with SARS-CoV-2 infection in unvaccinated individuals during Wild-Type and Alpha variants, 180-360 days post PCR test, age 12-18 years.....             | 40 |
| Table S4j– Association of health outcomes with SARS-CoV-2 infection in unvaccinated individuals during Wild-Type and Alpha variants, 180-360 days post PCR test, age 19-40 years.....             | 42 |
| Table S4k– Association of health outcomes with SARS-CoV-2 infection in unvaccinated individuals during Wild-Type and Alpha variants, 180-360 days post PCR test, age 41-60 years.....             | 45 |
| Table S4l– Association of health outcomes with SARS-CoV-2 infection in unvaccinated individuals during Wild-Type and Alpha variants, 180-360 days post PCR test, age >60 years.....               | 48 |
| Table S4m– Age heterogeneity in the association between SARS-CoV-2 and post-acute health outcomes in unvaccinated individuals during Wild-Type and Alpha variants 30-180 days post PCR test.....  | 51 |
| Table S4n– Age heterogeneity in the association between SARS-CoV-2 and post-acute health outcomes in unvaccinated individuals during Wild-Type and Alpha variants 180-360 days post PCR test..... | 52 |
| Table S5a - Characteristics of the sub cohort of Female vs. Male unvaccinated individuals, during Wild-Type and Alpha variants of the SARS-CoV-2 virus.....                                       | 53 |
| Table S5b - Association of health outcomes with SARS-CoV-2 infection in unvaccinated individuals, during Wild-Type and Alpha variants, 30-180 days post PCR test, by sex .....                    | 54 |
| Table S5c - Association of health outcomes with SARS-CoV-2 infection in unvaccinated individuals, during Wild-Type and Alpha variant, 180-360 days post PCR test, by sex .....                    | 60 |
| Table S5d– Sex heterogeneity in the association between SARS-CoV-2 and post-acute health outcomes in unvaccinated individuals during Wild-Type and Alpha variants 30-180 days post PCR test.....  | 66 |
| Table S5e– Sex heterogeneity in the association between SARS-CoV-2 and post-acute health outcomes in unvaccinated individuals during Wild-Type and Alpha variants 180-360 days post PCR test..... | 67 |
| Table S6a - Characteristics of the sub cohort of SARS-CoV-2 Wild-Type variant vs. Alpha variant, unvaccinated individuals, matched by age and gender .....                                        | 68 |

|                                                                                                                                                                                                                                                                   |    |
|-------------------------------------------------------------------------------------------------------------------------------------------------------------------------------------------------------------------------------------------------------------------|----|
| Table S6b - Association of health outcomes with SARS-CoV-2 infection in unvaccinated individuals, 30-180 days post PCR test, by Wild-Type vs Alpha variants.....                                                                                                  | 69 |
| Table S6c - Association of health outcomes with SARS-CoV-2 infection in unvaccinated individuals, 180-360 days post PCR test, by Wild-Type vs Alpha variants .....                                                                                                | 70 |
| Figure S3 - Hazard ratio of long COVID health outcomes during the early and the late periods for the wild-type and Alpha SARS-CoV-2.....                                                                                                                          | 71 |
| Table S7a - Characteristics of the sub cohort of SARS-CoV-2 Wild-Type/Alpha variant vs. Delta variant, unvaccinated individuals, matched by age and gender .....                                                                                                  | 72 |
| Table S7b - Association of health outcomes with SARS-CoV-2 infection in unvaccinated individuals, 30-90 days post PCR test, by Wild-Type/Alpha variants vs. Delta variant .....                                                                                   | 73 |
| Figure S4 - Hazard ratio of long COVID health outcomes 30-90 days post-infection for the wild-type/Alpha and Delta SARS-CoV-2 variants.....                                                                                                                       | 74 |
| Table S8a - Characteristics of the sub cohort of SARS-CoV-2 positive individuals, vaccinated (including old status) vs. unvaccinated, during Alpha and Delta variants, with additional match between vaccinated and unvaccinated patients by age and gender ..... | 75 |
| Table S8b - Association of health outcomes with SARS-CoV-2 infection in infected individuals, 30-90 days post PCR positive test, during Alpha and Delta variants period, by vaccinated (including old status) vs. unvaccinated status .....                       | 76 |
| Table S9a - Characteristics of the sub cohort of SARS-CoV-2 infected individuals, vaccinated vs. unvaccinated, during Alpha and Delta variants, with additional match between vaccinated (excluding old status) and unvaccinated patients by age and gender.....  | 78 |
| Table S9b - Association of health outcomes with SARS-CoV-2 infection in infected individuals, 30-90 days post PCR positive test, during Beta and Delta variants period, by vaccinated (excluding old status) vs. unvaccinated status.....                         | 79 |

**Table S1 - List of health outcomes included in the study**

List of outcomes included in the study collected from several resources including the Centers for Disease Control and Prevention (CDC) reports, The World Health Organization (WHO) publications, the Israeli Ministry of Health and relevant scientific publications (See methods section). These outcomes were further sub-grouped to symptoms, chronic conditions, acute diagnoses and infectious diseases.

| Outcome                                              | Subgroup            | ICD10                      | Taken first occurrence | Outcome group |
|------------------------------------------------------|---------------------|----------------------------|------------------------|---------------|
| Abdominal pain <sup>1-4</sup>                        |                     | R10.9                      |                        | Symptom       |
| Anosmia and Dysgeusia <sup>5</sup>                   |                     | R43.0, R43.8               |                        | Symptom       |
| Arthralgia <sup>1,3,4</sup>                          |                     | M25.5                      |                        | Symptom       |
| Bloody stool <sup>1</sup>                            |                     | K92.1                      |                        | Symptom       |
| Chest pain <sup>1,4,5</sup>                          |                     | R07.9, R07.1, R07.8, R07.2 |                        | Symptom       |
| Chills <sup>3,4,6</sup>                              |                     | R68.83                     |                        | Symptom       |
| Concentration and memory impairment <sup>1,4,5</sup> | Memory difficulties | R41.83, R41.2, R68.89      |                        | Symptom       |
|                                                      | ADHD                | F90.0 (314.00, Y23257)     |                        | Symptom       |
|                                                      | Cognitive deficit   | R41.83, R41.2              |                        | Symptom       |
| Cough <sup>1,3-7</sup>                               |                     | R05                        |                        | Symptom       |
| Convulsions <sup>8</sup>                             |                     | R56.9, R56.01, R56.00      | 1                      | Symptom       |
| Diarrhea <sup>1-4,6</sup>                            |                     | R19.7                      |                        | Symptom       |
| Dizziness <sup>1,4</sup>                             |                     | R42                        |                        | Symptom       |
| Dyspnea <sup>1,3-7</sup>                             |                     | R06                        |                        | Symptom       |
| Hair loss <sup>1,4</sup>                             |                     | L65.8, L65.0, L65.9        |                        | Symptom       |
| Headache <sup>1-7</sup>                              |                     | G44, G43                   |                        | Symptom       |
| Hyperhidrosis                                        |                     | R61                        |                        | Symptom       |
| Insomnia <sup>5,9</sup>                              |                     | F51                        |                        | Symptom       |
| Loss of appetite                                     |                     | R63.4, R63.6               |                        | Symptom       |
| Lymphadenopathy <sup>1</sup>                         |                     | R59.9                      |                        | Symptom       |
| Menstruation abnormalities*                          |                     | N91, N92                   | 1                      | Symptom       |
| Muscle atrophy <sup>1</sup>                          |                     | M62.5                      |                        | Symptom       |
| Myalgia <sup>1-4,6</sup>                             |                     | M60.9                      |                        | Symptom       |
| Nausea or vomiting <sup>1-4,6</sup>                  |                     | R11.0, R11.2, R11.10       |                        | Symptom       |
| Palpitations <sup>1,4</sup>                          |                     | R00.0, R00.2               |                        | Symptom       |
| Paresthesia <sup>1,5</sup>                           |                     | R20                        |                        | Symptom       |
| Respiratory disorders <sup>10</sup>                  |                     | J98 excluded 1,5,6,8,01 () | 1                      | Symptom       |
| Rhinorrhea <sup>4</sup>                              |                     | J34.8                      |                        | Symptom       |
| Skin rash <sup>1-3</sup>                             |                     | R21, R50.6, R53.9          |                        | Symptom       |
| Sore throat <sup>1,3,4,6</sup>                       |                     | R07.0                      |                        | Symptom       |
| Tinnitus <sup>4</sup>                                |                     | H93                        |                        | Symptom       |
| Tremor <sup>1,4</sup>                                |                     | R25.9                      |                        | Symptom       |
| Visual disturbances <sup>1</sup>                     |                     | H53                        |                        | Symptom       |
| Voice disorder <sup>1</sup>                          |                     | R49.9                      |                        | Symptom       |

|                                                      |                                       |                                   |   |                   |
|------------------------------------------------------|---------------------------------------|-----------------------------------|---|-------------------|
| Weakness <sup>1,2</sup>                              |                                       | R53                               |   | Symptom           |
| Weight loss <sup>1,5</sup>                           |                                       | R63.4                             |   | Symptom           |
| Anxiety <sup>7,9</sup>                               |                                       | F41                               | 1 | Chronic Condition |
| Cardiac arrhythmias <sup>7</sup>                     | Paroxysmal tachycardia                | I47                               | 1 | Chronic Condition |
|                                                      | Atrial fibrillation and flutter       | I48                               |   |                   |
|                                                      | Other cardiac arrhythmias             | I49 (excluded I49.9)              |   |                   |
| Celiac disease*                                      |                                       | K90.0                             |   | Chronic Condition |
| Chronic interstitial pulmonary disease <sup>11</sup> | Interstitial pulmonary fibrosis       |                                   | 1 | Chronic Condition |
|                                                      | Long interstitial pulmonary diseases  | J84                               |   |                   |
| Chronic kidney disease <sup>10</sup>                 |                                       | N18                               | 1 | Chronic Condition |
| Congestive heart failure <sup>10</sup>               | heart failure                         | I50                               | 1 | Chronic Condition |
|                                                      | Pulmonary edema                       | J81                               |   |                   |
|                                                      | Cardiomyopathy                        | I42 (exclude i42.6)               |   |                   |
| Depression <sup>7</sup>                              |                                       | F32                               | 1 | Chronic Condition |
| Diabetes Mellitus <sup>7,10</sup>                    | Diabetes type1                        | E10                               | 1 | Chronic Condition |
|                                                      | Diabetes type2                        | E11                               | 1 |                   |
| Diseases of the nervous system <sup>7</sup>          | Trigeminal neuralgia                  | G50.0                             | 1 | Chronic Condition |
|                                                      | Neuropathies                          | G50, G51, G52, G60.9              |   |                   |
|                                                      | Myoneural junction or muscle disease  | G70, G73                          |   |                   |
|                                                      | Nerve root and plexus disorders       | G54.9                             |   |                   |
|                                                      | Neuropathies                          | G56, G57, G58, G60, G62.81, G64   |   |                   |
| Epilepsy                                             |                                       | G40                               | 1 | Chronic Condition |
| Fatty Liver <sup>10</sup>                            |                                       | K73, K75, K76                     | 1 | Chronic Condition |
| Hypertension <sup>1</sup>                            |                                       | I10                               | 1 | Chronic Condition |
| Ischemic heart disease <sup>7,9</sup>                | Acute myocardial infarction           | I21, I22, I24                     | 1 | Chronic Condition |
|                                                      | Angina pectoris                       | I20                               |   |                   |
|                                                      | Chronic ischemic heart disease        | I25                               |   |                   |
| Parkinsonism <sup>9</sup>                            |                                       | G20                               | 1 | Chronic Condition |
| Psychosis <sup>7,9</sup>                             |                                       | F20, F22, F23, F24, F25, F28, F30 | 1 | Chronic Condition |
| Pulmonary disease <sup>7</sup>                       | Emphysema                             | J43                               |   | Chronic Condition |
|                                                      | Chronic obstructive pulmonary disease | J44                               |   |                   |
|                                                      | Bronchiectasis                        | J47                               |   |                   |
| Acute respiratory distress syndrome <sup>11</sup>    |                                       | J80                               | 1 | Acute Diagnosis   |
| Appendicitis <sup>12</sup>                           |                                       | K35                               | 1 | Acute Diagnosis   |
| Cerebral hemorrhage <sup>7,9</sup>                   |                                       | I60, I61, I62                     | 1 | Acute Diagnosis   |
| Conjunctivitis <sup>1</sup>                          |                                       | H10                               |   | Acute Diagnosis   |
| Diseases of the pleura                               | Pneumothorax                          | J93                               | 1 | Acute Diagnosis   |
|                                                      | Other pleural condition               | J94                               |   |                   |
| Encephalitis <sup>7,9</sup>                          |                                       | G04, G05, A86, A85                |   | Acute Diagnosis   |
| Guillain-Barré syndrome <sup>7,9</sup>               |                                       | G61                               |   | Acute Diagnosis   |

|                                                                               |                               |                 |   |                    |
|-------------------------------------------------------------------------------|-------------------------------|-----------------|---|--------------------|
| Herpes simplex <sup>11</sup>                                                  |                               | B00             | 1 | Acute Diagnosis    |
| Hospitalization                                                               |                               |                 |   | Acute Diagnosis    |
| Hyperreactive airway disease <sup>13</sup>                                    | Bronchitis                    | J40, J41, J42   | 1 | Acute Diagnosis    |
|                                                                               | Asthma                        | J45             | 1 |                    |
| Invasive pneumococcal                                                         |                               | J13             | 1 | Acute Diagnosis    |
| Ischemic stroke and TIA <sup>7,9</sup>                                        |                               | I63, G45        | 1 | Acute Diagnosis    |
| Kawasaki disease and Pediatric inflammatory multisystem syndrome <sup>7</sup> | Kawasaki's disease, PIMS      | M30.3           |   | Acute Diagnosis    |
| Lung abscess <sup>11,13</sup>                                                 |                               | J85             | 1 | Acute Diagnosis    |
| Myocarditis <sup>10</sup>                                                     |                               | I40, I41        |   | Acute Diagnosis    |
| Pericarditis <sup>13</sup>                                                    | Acute pericarditis            | I30             | 1 | Acute Diagnosis    |
|                                                                               | Other diseases of pericardium | I31             |   |                    |
| Pulmonary eosinophilia <sup>7</sup>                                           |                               | J82             | 1 | Acute Diagnosis    |
| Respiratory failure <sup>10</sup>                                             |                               | J96             | 1 | Acute Diagnosis    |
| Venous thromboembolism <sup>7</sup>                                           |                               | I26, I80, I82   |   | Acute Diagnosis    |
| EBV infection*                                                                |                               | labs - serology |   | Infectious Disease |
| Herpes Zoster <sup>11</sup>                                                   |                               | B02             |   | Infectious Disease |
| Streptococcal tonsillitis*                                                    |                               | labs - culture  |   | Infectious Disease |

\*Outcomes reported by MHS covid-19 specialist physicians.

## References

1. Michelen, M. *et al.* *Characterising long term Covid-19: a living systematic review.* 2020.12.08.20246025  
<https://www.medrxiv.org/content/10.1101/2020.12.08.20246025v2> (2021)  
doi:10.1101/2020.12.08.20246025.
2. Israeli Ministry of Health. Results of the Long-COVID Survey Among Children in Israel. *Israeli Ministry of Health press releases* <https://www.gov.il/en/departments/news/13092021-01> (2021).
3. Stavem, K., Ghanima, W., Olsen, M. K., Gilboe, H. M. & Einvik, G. Persistent symptoms 1.5–6 months after COVID-19 in non-hospitalised subjects: a population-based cohort study. *Thorax* **76**, 405–407 (2021).
4. Nasserie, T., Hittle, M. & Goodman, S. N. Assessment of the Frequency and Variety of Persistent Symptoms Among Patients With COVID-19: A Systematic Review. *JAMA Netw Open* **4**, e2111417 (2021).
5. The Writing Committee for the COMEBAC Study Group. Four-Month Clinical Status of a Cohort of Patients After Hospitalization for COVID-19. *JAMA* **325**, 1525–1534 (2021).
6. Logue, J. K. *et al.* Sequelae in Adults at 6 Months After COVID-19 Infection. *JAMA Network Open* **4**, e210830 (2021).

7. Lund, L. C. *et al.* Post-acute effects of SARS-CoV-2 infection in individuals not requiring hospital admission: a Danish population-based cohort study. *The Lancet Infectious Diseases* **0**, (2021).
8. Kurd, M., Hashavya, S., Benenson, S. & Gilboa, T. Seizures as the main presenting manifestation of acute SARS-CoV-2 infection in children. *Seizure* **92**, 89–93 (2021).
9. Taquet, M., Geddes, J. R., Husain, M., Luciano, S. & Harrison, P. J. 6-month neurological and psychiatric outcomes in 236 379 survivors of COVID-19: a retrospective cohort study using electronic health records. *Lancet Psychiatry* **8**, 416–427 (2021).
10. Ayoubkhani, D. *et al.* Post-covid syndrome in individuals admitted to hospital with covid-19: retrospective cohort study. *BMJ* **372**, n693 (2021).
11. Lopez-Leon, S. *et al.* More than 50 long-term effects of COVID-19: a systematic review and meta-analysis. *Sci Rep* **11**, 16144 (2021).
12. Georgakopoulou, V. E. *et al.* COVID-19-associated acute appendicitis in adults. A report of five cases and a review of the literature. *Exp Ther Med* **24**, 482 (2022).
13. SeyedAlinaghi, S. *et al.* Late Complications of COVID-19; a Systematic Review of Current Evidence. *Arch Acad Emerg Med* **9**, e14 (2021).



**Figure S1:** Daily numbers of SARS-CoV-2 infected individuals in Israel, by the dominance of the COVID-19 strain.

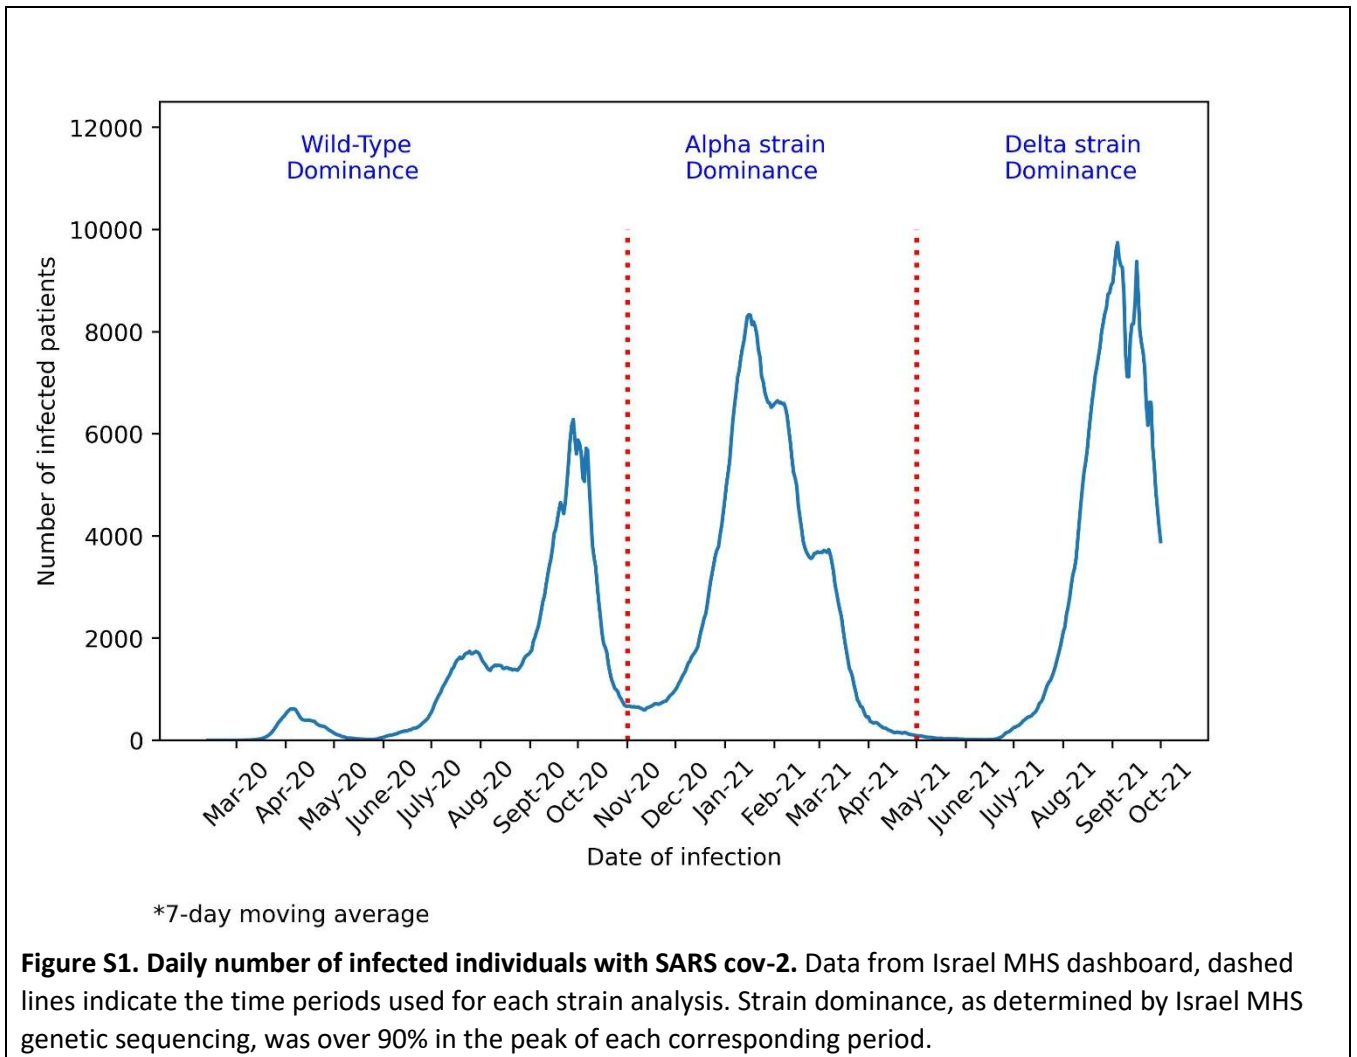

## Health outcomes analysis

**Table S2a** - Characteristics of the sub cohort of unvaccinated individuals during Wild-Type and Alpha variants of the SARS-CoV-2 virus for all age groups

| Characteristics                       | SARS-CoV-2 positive individuals (%)<br>(n=170,280) | SARS-CoV-2 negative individuals (%)<br>(n=170,280) |
|---------------------------------------|----------------------------------------------------|----------------------------------------------------|
| Age, Median (IQR) yr                  | 24 (13-42)                                         | 24 (14-43)                                         |
| Age group                             |                                                    |                                                    |
| 0-4 yr                                | 12,329 (7.2%)                                      | 12,329 (7.2%)                                      |
| 5-11 yr                               | 23,185 (13.6%)                                     | 23,185 (13.6%)                                     |
| 12-18 yr                              | 29,188 (17.1%)                                     | 29,188 (17.1%)                                     |
| 19-40 yr                              | 59,876 (35.2%)                                     | 59,876 (35.2%)                                     |
| 41-60 yr                              | 34,867 (20.5%)                                     | 34,867 (20.5%)                                     |
| >60 yr                                | 10,835 (6.4%)                                      | 10,835 (6.4%)                                      |
| Sex                                   |                                                    |                                                    |
| Female                                | 84,500 (49.6%)                                     | 84,500 (49.6%)                                     |
| Male                                  | 85,780 (50.4%)                                     | 85,780 (50.4%)                                     |
| Dominant variant of the COVID-19virus |                                                    |                                                    |
| Wild-Type                             | 72,317 (42.5%)                                     | 72,317 (42.5%)                                     |
| Alpha                                 | 97,963 (57.5%)                                     | 97,963 (57.5%)                                     |
| Delta                                 | 0 (0%)                                             | 0 (0%)                                             |
| Vaccine status                        |                                                    |                                                    |
| Unvaccinated                          | 170,280 (100%)                                     | 170,280 (100%)                                     |
| One Vaccine dose                      | 0 (0%)                                             | 0 (0%)                                             |
| Two Vaccine doses                     | 0 (0%)                                             | 0 (0%)                                             |
| Booster dose                          | 0 (0%)                                             | 0 (0%)                                             |

**Table S2b** – Association of health outcomes with SARS-CoV-2 infection in unvaccinated individuals during Wild-Type and Alpha variants, 30-180 days post PCR test

| Outcome                                | N       | SARS-CoV-2 Positive |                                            | SARS-CoV-2 Negative |                                            | Hazard Ratio<br>95%CI | Q value | Risk<br>Diff/10,000<br>persons |
|----------------------------------------|---------|---------------------|--------------------------------------------|---------------------|--------------------------------------------|-----------------------|---------|--------------------------------|
|                                        |         | No.<br>events       | Absolute<br>risk/10,000<br>persons [95%CI] | No.<br>events       | Absolute<br>risk/10,000<br>persons [95%CI] |                       |         |                                |
| Abdominal pain                         | 135,627 | 4,356               | 344.4 [334.7-354.5]                        | 4,671               | 345.7 [335.9-355.8]                        | 0.99 [0.95-1.04]      | 0.93    | -1.3 [(-15.3)-12.7]            |
| Acute respiratory distress syndrome    | 162,631 | 6                   |                                            | 1                   |                                            |                       |         |                                |
| Anosmia and Dysgeusia                  | 162,387 | 344                 | 25.1 [22.7-27.7]                           | 90                  | 5.5 [4.4-6.8]                              | 4.59 [3.63-5.80]      | <0.001  | 19.6 [16.9-22.4]               |
| Anxiety                                | 128,026 | 549                 | 47.4 [43.7-51.4]                           | 541                 | 41.7 [38.3-45.5]                           | 1.13 [1.01-1.27]      | 0.18    | 5.7 [0.5-11.0]                 |
| Appendicitis                           | 153,343 | 89                  | 6.5 [5.3-7.9]                              | 105                 | 6.6 [5.4-8.1]                              | 0.97 [0.73-1.29]      | 0.97    | -0.2 [(-2.0)-1.7]              |
| Arthralgia                             | 156,771 | 1,139               | 76.3 [72.0-80.8]                           | 1,070               | 68.9 [64.9-73.2]                           | 1.11 [1.02-1.20]      | 0.11    | 7.3 [1.3-13.4]                 |
| Bloody stool                           | 161,980 | 175                 | 11.6 [10.0-13.4]                           | 183                 | 11.6 [10.0-13.4]                           | 0.99 [0.81-1.22]      | 1.00    | 0.0 [(-2.4)-2.4]               |
| Cardiac arrhythmias                    | 154,039 | 165                 | 11.4 [9.8-13.2]                            | 152                 | 9.6 [8.1-11.3]                             | 1.19 [0.96-1.49]      | 0.34    | 1.8 [(-0.5)-4.2]               |
| Celiac disease                         | 162,051 | 94                  | 5.8 [4.8-7.2]                              | 125                 | 7.6 [6.4-9.1]                              | 0.77 [0.59-1.01]      | 0.23    | -1.8 [(-3.6)-0.1]              |
| Cerebral hemorrhage                    | 162,070 | 12                  | 0.6 [0.3-1.2]                              | 19                  | 1.1 [0.7-1.7]                              | 0.63 [0.29-1.36]      | 0.53    | -0.4 [(-1.1)-0.3]              |
| Chest pain                             | 151,539 | 2,770               | 197.1 [190.2-204.4]                        | 2,125               | 140.8 [134.9-147.0]                        | 1.41 [1.33-1.49]      | <0.001  | 56.3 [47.0-65.7]               |
| Chills                                 | 162,882 | -                   |                                            | -                   |                                            |                       |         |                                |
| Chronic interstitial pulmonary disease | 162,739 | 9                   | 0.5 [0.3-1.1]                              | 1                   | 0.1 [0.0-0.5]                              | 10.65 [1.12-101.74]   | 0.18    | 0.5 [0.0-1.0]                  |
| Chronic kidney disease                 | 159,099 | 20                  | 1.3 [0.8-2.0]                              | 23                  | 1.6 [1.0-2.3]                              | 0.81 [0.45-1.48]      | 0.78    | -0.3 [(-1.2)-0.6]              |
| Concentration and memory impairment    | 161,785 | 403                 | 28.0 [25.5-30.7]                           | 243                 | 15.2 [13.4-17.2]                           | 1.85 [1.58-2.17]      | <0.001  | 12.8 [9.6-16.1]                |
| Congestive heart failure               | 161,295 | 39                  | 2.4 [1.8-3.3]                              | 61                  | 3.7 [2.9-4.8]                              | 0.65 [0.43-0.97]      | 0.17    | -1.3 [(-2.6)-(-0.1)]           |
| Conjunctivitis                         | 148,671 | 2,474               | 170.1 [163.5-176.9]                        | 2,366               | 161.6 [155.1-168.3]                        | 1.05 [1.00-1.12]      | 0.25    | 8.5 [(-0.8)-17.9]              |
| Convulsions                            | 155,920 | 72                  | 5.1 [4.0-6.3]                              | 81                  | 5.5 [4.4-6.8]                              | 0.93 [0.68-1.27]      | 0.87    | -0.4 [(-2.1)-1.3]              |
| Cough                                  | 139,170 | 3,851               | 289.0 [280.2-298.1]                        | 3,598               | 266.8 [258.3-275.6]                        | 1.09 [1.04-1.14]      | 0.00    | 22.2 [9.7-34.6]                |
| Depression                             | 143,401 | 218                 | 17.1 [15.1-19.5]                           | 251                 | 17.3 [15.2-19.6]                           | 0.99 [0.83-1.19]      | 1.00    | -0.2 [(-3.3)-2.9]              |
| Diabetes Mellitus                      | 152,515 | 183                 | 123.0 [10.6-14.2]                          | 140                 | 10.2 [8.7-11.9]                            | 1.21 [0.98-1.50]      | 0.27    | 2.1 [(-0.3)-4.6]               |
| Diarrhea                               | 162,686 | 17                  | 1.1 [0.7-1.7]                              | 31                  | 1.8 [1.2-2.6]                              | 0.62 [0.35-1.12]      | 0.34    | -0.7 [(-1.6)-0.2]              |
| Diseases of the nervous system         | 138,284 | 329                 | 26.5 [23.9-29.4]                           | 326                 | 22.6 [20.2-25.3]                           | 1.16 [0.99-1.35]      | 0.23    | 3.9 [0.1-7.7]                  |
| Diseases of the                        |         | 14                  | 0.9 [0.5-1.5]                              | 10                  | 0.6 [0.3-1.1]                              | 1.56 [0.68-           | 0.59    | 0.3 [(-0.3)-1.0]               |

|                              |         |       |                     |       |                     |                  |        |                       |
|------------------------------|---------|-------|---------------------|-------|---------------------|------------------|--------|-----------------------|
| pleura                       | 162,092 |       |                     |       |                     | 3.58]            |        |                       |
| Dizziness                    | 155,720 | 1,389 | 94.1 [89.3-99.1]    | 1,260 | 82.7 [78.3-87.4]    | 1.14 [1.06-1.23] | 0.01   | 11.4 [4.7-18.1]       |
| Dyspnea                      | 155,240 | 2,853 | 197.2 [190.3-204.3] | 1,673 | 111.5 [106.3-117.0] | 1.79 [1.68-1.90] | <0.001 | 85.7 [76.9-94.5]      |
| EBV infection                | 162,882 | -     |                     | -     |                     |                  |        |                       |
| Encephalitis                 | 162,834 | 7     | 0.5 [0.2-1.0]       | 13    | 0.8 [0.5-1.4]       | 0.62 [0.25-1.52] | 0.59   | -0.3 [(-0.9)-0.3]     |
| Epilepsy                     | 158,564 | 48    | 3.2 [2.4-4.2]       | 61    | 3.8 [2.9-4.9]       | 0.86 [0.59-1.26] | 0.73   | -0.6 [(-2.0)-0.7]     |
| Fatty Liver                  | 148,501 | 382   | 27.8 [25.2-30.6]    | 324   | 21.0 [18.8-23.5]    | 1.31 [1.13-1.52] | 0.01   | 6.8 [3.2-10.4]        |
| Guillain-Barre syndrome      | 162,853 | 11    | 0.7 [0.4-1.3]       | 11    | 0.6 [0.3-1.2]       | 1.12 [0.48-2.63] | 0.93   | 0.1 [(-0.6)-0.7]      |
| Hair loss                    | 159,395 | 1,055 | 73.3 [69.2-77.7]    | 687   | 41.8 [38.7-45.1]    | 1.75 [1.59-1.93] | <0.001 | 31.6 [26.2-36.9]      |
| Headache                     | 144,950 | 2,847 | 210.6 [203.2-218.2] | 2,932 | 204.3 [197.0-211.9] | 1.03 [0.98-1.09] | 0.51   | 6.2 [(-4.3)-16.8]     |
| Herpes Simplex               | 129,338 | 218   | 18.7 [16.5-21.3]    | 197   | 14.9 [12.9-17.2]    | 1.25 [1.03-1.52] | 0.13   | 3.8 [0.6-7.1]         |
| Herpes Zoster                | 161,611 | 248   | 17.6 [15.6-19.8]    | 285   | 17.2 [15.3-19.4]    | 1.01 [0.86-1.20] | 0.98   | 0.4 [(-2.6)-3.3]      |
| Hospitalization              | 147,172 | 2,451 | 172.0 [165.4-178.9] | 2,292 | 162.8 [156.3-169.5] | 1.06 [1.01-1.13] | 0.17   | 9.3 [(-0.2) - 18.7]   |
| Hyperhidrosis                | 162,707 | 41    | 3.0 [2.3-4.0]       | 52    | 2.8 [2.1-3.8]       | 1.07 [0.71-1.60] | 0.92   | 0.2 [(-1.0)-1.4]      |
| Hyperreactive Airway Disease | 95,601  | 339   | 37.0 [33.3-41.1]    | 296   | 31.9 [28.4-35.7]    | 1.16 [0.99-1.36] | 0.23   | 5.1 [(-0.3)-10.5]     |
| Hypertension                 | 138,312 | 253   | 19.6 [17.3-22.1]    | 207   | 15.4 [13.4-17.6]    | 1.27 [1.06-1.53] | 0.07   | 4.2 [1.0-7.4]         |
| Insomnia                     | 162,758 | 22    | 1.6 [1.1-2.4]       | 25    | 1.5 [1.0-2.2]       | 1.09 [0.62-1.93] | 0.92   | 0.1 [(-0.8)-1.1]      |
| Invasive pneumococcal        | 156,136 | 50    | 3.1 [2.4-4.2]       | 49    | 3.3 [2.5-4.4]       | 0.95 [0.64-1.41] | 0.93   | -0.2 [(-1.5) - 1.1]   |
| Ischemic heart disease       | 155,954 | 125   | 8.7 [7.3-10.3]      | 162   | 10.2 [8.7-11.9]     | 0.86 [0.68-1.08] | 0.47   | -1.5 [(-3.7)-0.7]     |
| Ischemic stroke and TIA      | 159,687 | 43    | 2.9 [2.2-3.9]       | 73    | 4.4 [3.4-5.5]       | 0.69 [0.47-1.00] | 0.21   | -1.4 [(-2.8)-(-0.1)]  |
| Kawasaki disease,PIMS        | 162,869 | 5     |                     | 2     |                     |                  |        |                       |
| Loss of appetite             | 159,712 | 620   | 42.2 [39.1-45.6]    | 716   | 44.2 [41.0-47.6]    | 0.96 [0.86-1.06] | 0.69   | -1.9 [(-6.6)-2.7]     |
| Lung abscess                 | 162,784 | 1     |                     | 1     |                     |                  |        |                       |
| Lymphadenopathy              | 160,411 | 481   | 34.2 [31.4-37.2]    | 682   | 41.9 [38.8-45.3]    | 0.81 [0.72-0.91] | 0.00   | -7.8 [(-12.1)-(-3.4)] |
| Menstruation abnormalities   | 123,816 | 385   | 331.0 [30.0-36.5]   | 392   | 33.2 [301.0-36.6]   | 1.01 [0.88-1.16] | 0.99   | -0.1 [(-4.7)-4.6]     |
| Muscle atrophy               | 162,665 | 83    | 52.0 [4.2-6.5]      | 61    | 3.8 [2.9-4.9]       | 1.40 [1.01-1.96] | 0.19   | 1.4 [0.0-3.0]         |
| Myalgia                      | 156,946 | 1,287 | 88.0 [83.4-92.8]    | 1,086 | 70.5 [66.4-74.8]    | 1.24 [1.15-1.35] | <0.001 | 17.5 [11.2-23.8]      |
| Myocarditis                  | 162,841 | 11    | 0.7 [0.4-1.3]       | 5     | 0.3 [0.1-0.7]       | 2.60 [0.86-7.88] | 0.29   | 0.4 [(-0.1)-1.0]      |
| Nausea or vomiting           | 156,426 | 1,236 | 83.5 [79.1-88.3]    | 1,340 | 86.6 [82.0-91.4]    | 0.97 [0.89-1.04] | 0.68   | -3.1 [(-9.6)-3.5]     |

|                           |         |       |                     |       |                     |                  |        |                    |
|---------------------------|---------|-------|---------------------|-------|---------------------|------------------|--------|--------------------|
| Palpitations              | 159,339 | 1,015 | 67.9 [63.9-72.1]    | 734   | 45.7 [42.5-49.2]    | 1.49 [1.35-1.64] | <0.001 | 22.1 [16.8-27.4]   |
| Paresthesia               | 159,539 | 713   | 48.3 [45.0-51.9]    | 768   | 47.4 [44.1-51.0]    | 1.02 [0.92-1.13] | 0.89   | 0.9 [(-4.0)-5.8]   |
| Parkinsonism              | 162,289 | 13    | 0.9 [0.5-1.5]       | 11    | 0.8 [0.5-1.5]       | 1.04 [0.49-2.21] | 0.99   | 0.0 [(-0.7)-0.7]   |
| Pericarditis              | 161,758 | 35    | 2.3 [1.7-3.2]       | 28    | 1.7 [1.1-2.4]       | 1.51 [0.93-2.48] | 0.30   | 0.6 [(-0.4)-1.7]   |
| Psychosis                 | 159,489 | 60    | 3.9 [3.0-5.0]       | 74    | 4.4 [3.5-5.6]       | 0.90 [0.64-1.28] | 0.82   | -0.5 [(-2.0)-1.0]  |
| Pulmonary disease         | 157,381 | 50    | 3.8 [2.9-4.9]       | 51    | 3.2 [2.4-4.3]       | 1.14 [0.78-1.67] | 0.77   | 0.5 [(-0.8)-1.9]   |
| Pulmonary eosinophilia    | 162,835 | -     |                     | 1     |                     |                  |        |                    |
| Respiratory disorders     | 161,005 | 97    | 6.3 [5.2-7.7]       | 44    | 2.6 [1.9-3.5]       | 2.40 [1.67-3.44] | <0.001 | 3.7 [2.3-5.3]      |
| Respiratory failure       | 162,660 | 9     | 0.6 [0.4-1.2]       | 12    | 0.8 [0.5-1.4]       | 0.77 [0.34-1.74] | 0.79   | -0.2 [(-0.9)-0.5]  |
| Rhinorrhea                | 162,561 | 67    | 4.2 [3.3-5.3]       | 82    | 5.0 [4.0-6.2]       | 0.84 [0.61-1.17] | 0.61   | -0.8 [(-2.3)-0.7]  |
| Skin rash                 | 155,745 | 1,162 | 80.8 [76.4-85.4]    | 1,322 | 83.3 [78.8-88.1]    | 0.97 [0.90-1.05] | 0.79   | -2.6 [(-9.0)-3.9]  |
| Sore throat               | 158,660 | 708   | 44.9 [41.6-48.3]    | 754   | 49.7 [46.3-53.4]    | 0.90 [0.81-1.00] | 0.19   | -4.8 [(-9.7)-0.0]  |
| Streptococcal tonsillitis | 154,689 | 1,489 | 89.7 [85.1-94.7]    | 1,007 | 76.4 [72.1-80.9]    | 1.18 [1.09-1.28] | <0.001 | 13.4 [6.8-19.9]    |
| Tinnitus                  | 160,135 | 611   | 42.0 [38.9-45.4]    | 599   | 37.4 [34.5-40.6]    | 1.12 [1.00-1.26] | 0.19   | 4.6 [0.2-9.1]      |
| Tremor                    | 162,240 | 154   | 10.1 [8.6-11.7]     | 143   | 8.9 [7.6-10.6]      | 1.14 [0.91-1.43] | 0.56   | 1.1 [(-1.1)-3.3]   |
| Venous thromboembolism    | 161,976 | 211   | 13.3 [11.6-15.2]    | 201   | 13.7 [12.0-15.7]    | 0.97 [0.80-1.17] | 0.92   | -0.5 [(-3.0)-2.1]  |
| Visual disturbances       | 160,443 | 460   | 29.8 [27.2-32.6]    | 444   | 28.5 [26.0-31.3]    | 1.05 [0.92-1.20] | 0.75   | 1.3 [(-2.5)-5.1]   |
| Voice disorder            | 161,119 | 412   | 25.5 [23.1-28.2]    | 347   | 22.8 [20.5-25.3]    | 1.11 [0.97-1.29] | 0.37   | 2.7 [(-0.7)-6.2]   |
| Weakness                  | 150,829 | 3,681 | 251.6 [243.7-259.7] | 2,023 | 143.1 [137.1-149.3] | 1.78 [1.69-1.88] | <0.001 | 108.5 [98.4-118.6] |
| Weight loss               | 161,235 | 337   | 22.9 [20.6-25.4]    | 407   | 24.6 [22.3-27.2]    | 0.92 [0.80-1.07] | 0.57   | -1.7 [(-5.2)-1.7]  |

**Table S2c** - Association of health outcomes with SARS-CoV-2 infection in unvaccinated individuals during Wild-Type and Alpha variants, 180-360 days post PCR test

| Outcome                                | N       | SARS-CoV-2 Positive |                                               | SARS-CoV-2 Negative |                                               | Hazard Ratio<br>95%CI | Q<br>value | Risk Diff/10,000<br>persons |
|----------------------------------------|---------|---------------------|-----------------------------------------------|---------------------|-----------------------------------------------|-----------------------|------------|-----------------------------|
|                                        |         | No.<br>events       | Absolute<br>risk/10,000<br>persons<br>[95%CI] | No.<br>events       | Absolute<br>risk/10,000<br>persons<br>[95%CI] |                       |            |                             |
| Abdominal pain                         | 125,372 | 4,618               | 419.5 [407.9-431.4]                           | 5,104               | 435.0 [423.2-447.1]                           | 0.97 [0.93-1.01]      | 0.39       | -15.5 [(-32.3)-1.2]         |
| Acute respiratory distress syndrome    | 150,426 | -                   |                                               | 1                   |                                               |                       |            |                             |
| Anosmia and Dysgeusia                  | 150,177 | 208                 | 16.7 [14.7-19.0]                              | 83                  | 5.8 [4.6-7.2]                                 | 2.96 [2.29-3.82]      | <0.001     | 11.0 [8.5-13.6]             |
| Anxiety                                | 118,024 | 450                 | 45.3 [41.4-49.5]                              | 520                 | 45.7 [41.8-50.0]                              | 1.00 [0.88-1.14]      | 1.00       | -0.4 [(-6.2)-5.4]           |
| Appendicitis                           | 141,902 | 77                  | 5.9 [4.7-7.4]                                 | 111                 | 8.2 [6.8-9.9]                                 | 0.73 [0.54-0.97]      | 0.16       | -2.3 [(-4.4)-(-0.2)]        |
| Arthralgia                             | 144,926 | 1,217               | 95.4 [90.2-100.9]                             | 1,137               | 81.6 [76.8-86.6]                              | 1.17 [1.08-1.27]      | 0.00       | 13.8 [6.6-21.1]             |
| Bloody stool                           | 149,801 | 192                 | 14.6 [12.7-16.8]                              | 206                 | 14.8 [12.9-17.0]                              | 0.99 [0.81-1.20]      | 0.98       | -0.2 [(-3.1)-2.7]           |
| Cardiac arrhythmias                    | 142,459 | 113                 | 8.8 [7.3-10.6]                                | 137                 | 10.4 [8.8-12.4]                               | 0.86 [0.67-1.11]      | 0.53       | -1.7 [(-4.1)-0.8]           |
| Celiac disease                         | 149,881 | 121                 | 8.6 [7.2-10.3]                                | 150                 | 10.5 [8.9-12.3]                               | 0.81 [0.64-1.04]      | 0.29       | -1.8 [(-4.2)-0.5]           |
| Cerebral hemorrhage                    | 149,905 | 10                  | 0.9 [0.5-1.5]                                 | 15                  | 1.1 [0.7-1.8]                                 | 0.83 [0.39-1.78]      | 0.87       | -0.2 [(-1.1)-0.6]           |
| Chest pain                             | 140,058 | 2,413               | 198.1 [190.5-206.0]                           | 2,479               | 190.7 [183.2-198.4]                           | 1.05 [0.99-1.11]      | 0.30       | 7.4 [(-3.4)-18.3]           |
| Chills                                 | 150,638 | -                   |                                               | 2                   |                                               |                       |            |                             |
| Chronic interstitial pulmonary disease | 150,512 | 2                   |                                               | 1                   |                                               |                       |            |                             |
| Chronic kidney disease                 | 147,181 | 51                  | 4.0 [3.0-5.3]                                 | 42                  | 3.2 [2.4-4.4]                                 | 1.25 [0.83-1.88]      | 0.59       | 0.8 [(-0.7)-2.3]            |
| Concentration and memory impairment    | 149,618 | 407                 | 33.4 [30.4-36.6]                              | 276                 | 20.0 [17.8-22.6]                              | 1.69 [1.45-1.96]      | <0.001     | 13.3 [9.4-17.3]             |
| Congestive heart failure               | 149,241 | 32                  | 2.3 [1.7-3.3]                                 | 40                  | 3.1 [2.3-4.2]                                 | 0.76 [0.48-1.21]      | 0.54       | -0.7 [(-2.0)-0.5]           |
| Conjunctivitis                         | 137,431 | 2,468               | 198.2 [190.5-206.1]                           | 2,462               | 197.7 [190.1-205.7]                           | 1.01 [0.95-1.06]      | 0.94       | 0.4 [(-10.6)-11.5]          |
| Convulsions                            | 144,273 | 67                  | 4.8 [3.7-6.2]                                 | 57                  | 4.4 [3.4-5.6]                                 | 1.09 [0.77-1.57]      | 0.86       | 0.5 [(-1.2)-2.1]            |
| Cough                                  | 128,609 | 3,774               | 333.4 [323.1-344.0]                           | 3,788               | 318.6 [308.6-329.0]                           | 1.05 [1.00-1.10]      | 0.19       | 14.7 [0.1-29.4]             |
| Depression                             | 132,348 | 226                 | 20.5 [18.1-23.3]                              | 254                 | 19.6 [17.2-22.3]                              | 1.06 [0.89-1.27]      | 0.78       | 0.9 [(-2.7)-4.6]            |
| Diabetes Mellitus                      | 140,991 | 209                 | 16.7 [14.6-19.1]                              | 163                 | 12.9 [11.1-15.1]                              | 1.28 [1.05-1.57]      | 0.11       | 3.8 [0.8-6.8]               |
| Diarrhea                               | 150,464 | 27                  | 2.1 [1.5-3.1]                                 | 44                  | 2.9 [2.1-4.0]                                 | 0.74 [0.46-1.19]      | 0.50       | -0.8 [(-2.0)-0.4]           |
| Diseases of the nervous system         | 127,577 | 337                 | 30.6 [27.5-34.0]                              | 306                 | 26.0 [23.2-29.1]                              | 1.17 [1.00-1.36]      | 0.20       | 4.5 [0.2-9.0]               |

|                              |         |       |                     |       |                     |                   |        |                       |
|------------------------------|---------|-------|---------------------|-------|---------------------|-------------------|--------|-----------------------|
| Diseases of the pleura       | 149,917 | 10    | 0.7 [0.4-1.3]       | 14    | 1.1 [0.7-1.8]       | 0.66 [0.30-1.47]  | 0.60   | -0.4 [(-1.2)-0.4]     |
| Dizziness                    | 143,996 | 1,515 | 118.8 [113.0-124.9] | 1,355 | 102.1 [96.8-107.8]  | 1.17 [1.09-1.26]  | <0.001 | 16.7 [8.6-24.8]       |
| Dyspnea                      | 143,541 | 2,035 | 160.1 [153.4-167.1] | 1,640 | 124.7 [118.8-130.9] | 1.30 [1.22-1.38]  | <0.001 | 35.4 [26.3-44.6]      |
| EBV infection                | 150,638 | -     |                     | -     |                     |                   |        |                       |
| Encephalitis                 | 150,596 | 7     | 0.5 [0.2-1.1]       | 13    | 1.0 [0.6-1.7]       | 0.51 [0.20-1.28]  | 0.40   | -0.4 [(-1.2)-0.3]     |
| Epilepsy                     | 146,672 | 47    | 3.4 [2.5-4.5]       | 38    | 2.6 [1.9-3.7]       | 1.24 [0.80-1.93]  | 0.64   | 0.7 [(-0.6)-2.1]      |
| Fatty Liver                  | 137,156 | 358   | 31.4 [28.4-34.8]    | 337   | 26.4 [23.7-29.5]    | 1.16 [1.00-1.34]  | 0.22   | 5.0 [0.7-9.4]         |
| Guillain-Barre syndrome      | 150,609 | 7     | 0.5 [0.3-1.1]       | 3     | 0.2 [0.1-0.6]       | 2.90 [0.72-11.78] | 0.37   | 0.3 [(-0.2)-0.9]      |
| Hair loss                    | 147,371 | 559   | 45.5 [42.0-49.2]    | 703   | 50.2 [46.5-54.2]    | 0.93 [0.83-1.04]  | 0.46   | -4.7 [(-10.0)-0.6]    |
| Headache                     | 134,055 | 2,905 | 246.6 [237.9-255.6] | 3,181 | 255.7 [246.9-264.8] | 0.96 [0.92-1.01]  | 0.42   | -9.1 [(-21.7)-3.4]    |
| Herpes Simplex               | 119,578 | 217   | 20.3 [17.8-23.2]    | 228   | 20.1 [17.6-22.9]    | 0.99 [0.82-1.20]  | 0.99   | 0.2 [(-3.6)-4.1]      |
| Herpes Zoster                | 149,437 | 260   | 19.9 [17.6-22.4]    | 330   | 24.3 [21.8-27.1]    | 0.82 [0.70-0.96]  | 0.10   | -4.4 [(-8.0)-(-0.8)]  |
| Hospitalization              | 136,240 | 2,410 | 193.5 [185.9-201.5] | 2,424 | 198.9 [191.2-206.9] | 0.97 [0.92-1.03]  | 0.60   | -5.4 [-16.4-5.7]      |
| Hyperhidrosis                | 150,476 | 20    | 1.8 [1.2-2.7]       | 47    | 2.9 [2.1-3.9]       | 0.58 [0.35-0.97]  | 0.18   | -1.1 [(-2.3)-0.1]     |
| Hyperreactive Airway Disease | 88,877  | 353   | 43.2 [38.8-48.0]    | 302   | 37.4 [33.4-41.9]    | 1.15 [0.99-1.34]  | 0.25   | 5.8 [(-0.5)-12.0]     |
| Hypertension                 | 127,606 | 237   | 21.5 [19.0-24.5]    | 203   | 16.5 [14.3-19.0]    | 1.27 [1.05-1.53]  | 0.10   | 5.0 [1.4-8.7]         |
| Insomnia                     | 150,522 | 37    | 3.1 [2.2-4.2]       | 42    | 3.0 [2.2-4.1]       | 1.01 [0.65-1.55]  | 1.00   | 0.0 [(-1.3)-1.4]      |
| Invasive pneumococcal        | 144,428 | 63    | 4.4 [3.4-5.7]       | 57    | 4.4 [3.4-5.7]       | 1.02 [0.71-1.47]  | 0.99   | 0.0 [(-1.6) - 1.7]    |
| Ischemic heart disease       | 144,221 | 126   | 9.7 [8.1-11.6]      | 165   | 12.3 [10.5-14.4]    | 0.80 [0.64-1.01]  | 0.24   | -2.6 [(-5.2)-0.0]     |
| Ischemic stroke and TIA      | 147,678 | 54    | 3.9 [3.0-5.1]       | 53    | 3.9 [3.0-5.2]       | 1.03 [0.70-1.51]  | 0.98   | 0.0 [(-1.6)-1.5]      |
| Kawasaki disease,PIMS        | 150,625 | 3     |                     | 5     |                     |                   |        |                       |
| Loss of appetite             | 147,706 | 594   | 47.3 [43.8-51.2]    | 710   | 50.0 [46.4-53.9]    | 0.95 [0.85-1.05]  | 0.61   | -2.7 [(-8.0)-2.6]     |
| Lung abscess                 | 150,547 | 1     |                     | 1     |                     |                   |        |                       |
| Lymphadenopathy              | 148,360 | 501   | 39.9 [36.6-43.4]    | 658   | 45.4 [41.9-49.1]    | 0.88 [0.78-0.99]  | 0.15   | -5.5 [(-10.5)-(-0.5)] |
| Menstruation abnormalities   | 114,014 | 347   | 34.8 [31.4-38.7]    | 389   | 38.5 [34.9-42.5]    | 0.91 [0.79-1.05]  | 0.50   | -3.7 [(-9.0)-1.6]     |
| Muscle atrophy               | 150,445 | 71    | 5.4 [4.3-6.8]       | 61    | 4.8 [3.7-6.1]       | 1.14 [0.81-1.58]  | 0.74   | 0.6 [(-1.1)-2.4]      |
| Myalgia                      | 145,093 | 1,200 | 94.7 [89.6-100.1]   | 1,184 | 87.7 [82.8-92.9]    | 1.08 [1.00-1.17]  | 0.21   | 7.0 [(-0.3)-14.3]     |
| Myocarditis                  | 150,600 | 12    | 1.0 [0.6-1.7]       | 10    | 0.6 [0.3-1.3]       | 1.60 [0.68-3.77]  | 0.58   | 0.3 [(-0.4)-1.1]      |
| Nausea or vomiting           | 144,635 | 1,371 | 107.9 [102.4-113.7] | 1,543 | 114.4 [108.7-120.3] | 0.95 [0.88-1.02]  | 0.37   | -6.5 [(-14.6)-1.6]    |

|                           |         |       |                     |       |                     |                  |        |                       |
|---------------------------|---------|-------|---------------------|-------|---------------------|------------------|--------|-----------------------|
| Palpitations              | 147,340 | 833   | 63.7 [59.5-68.1]    | 773   | 55.4 [51.6-59.6]    | 1.16 [1.05-1.27] | 0.03   | 8.3 [2.4-14.1]        |
| Paresthesia               | 147,529 | 711   | 56.1 [52.2-60.3]    | 889   | 62.6 [58.5-67.0]    | 0.90 [0.82-0.99] | 0.17   | -6.6 [(-12.4)-(-0.7)] |
| Parkinsonism              | 150,109 | 14    | 1.2 [0.7-2.0]       | 15    | 1.2 [0.8-2.0]       | 0.89 [0.45-1.76] | 0.92   | 0.0 [(-0.9)-0.9]      |
| Pericarditis              | 149,592 | 32    | 2.5 [1.8-3.5]       | 26    | 1.8 [1.2-2.6]       | 1.40 [0.83-2.36] | 0.49   | 0.7 [(-0.4)-1.9]      |
| Psychosis                 | 147,522 | 55    | 3.7 [2.8-4.9]       | 73    | 5.5 [4.4-6.9]       | 0.66 [0.46-0.94] | 0.13   | -1.8 [(-3.5)-(-0.2)]  |
| Pulmonary disease         | 145,514 | 58    | 5.0 [3.9-6.4]       | 71    | 5.1 [4.0-6.5]       | 0.98 [0.69-1.38] | 0.98   | -0.2 [(-1.9)-1.6]     |
| Pulmonary eosinophilia    | 150,594 | 1     |                     | -     |                     |                  |        |                       |
| Respiratory disorders     | 148,937 | 30    | 2.3 [1.6-3.3]       | 35    | 2.6 [1.8-3.6]       | 0.83 [0.52-1.34] | 0.73   | -0.3 [(-1.5)-1.0]     |
| Respiratory failure       | 150,445 | 8     | 0.5 [0.2-1.1]       | 10    | 0.9 [0.5-1.6]       | 0.65 [0.25-1.67] | 0.67   | -0.3 [(-1.1)-0.3]     |
| Rhinorrhea                | 150,350 | 62    | 4.7 [3.7-6.1]       | 69    | 4.7 [3.6-6.0]       | 1.02 [0.72-1.45] | 0.98   | 0.1 [(-1.6)-1.8]      |
| Skin rash                 | 143,944 | 1,089 | 87.1 [82.1-92.3]    | 1,221 | 88.6 [83.6-93.8]    | 0.98 [0.91-1.07] | 0.91   | -1.5 [(-8.7)-5.7]     |
| Sore throat               | 146,769 | 797   | 59.7 [55.7-64.1]    | 738   | 56.6 [52.7-60.8]    | 1.05 [0.95-1.16] | 0.62   | 3.1 [(-2.7)-9.0]      |
| Streptococcal tonsillitis | 143,103 | 2,087 | 149.5 [142.9-156.4] | 1,555 | 132.8 [126.6-139.4] | 1.12 [1.05-1.20] | 0.01   | 16.6 [7.4-25.9]       |
| Tinnitus                  | 148,054 | 547   | 43.0 [39.6-46.7]    | 665   | 46.2 [42.7-50.1]    | 0.94 [0.84-1.05] | 0.59   | -3.2 [(-8.3)-1.9]     |
| Tremor                    | 150,044 | 150   | 11.1 [9.5-13.1]     | 164   | 11.8 [10.1-13.8]    | 0.93 [0.75-1.17] | 0.80   | -0.7 [(-3.3)-1.9]     |
| Venous thromboembolism    | 149,803 | 198   | 14.4 [12.5-16.6]    | 182   | 14.0 [12.1-16.1]    | 1.02 [0.83-1.24] | 0.98   | 0.4 [(-2.4)-3.3]      |
| Visual disturbances       | 148,369 | 473   | 36.1 [33.0-39.5]    | 500   | 36.9 [33.7-40.3]    | 0.98 [0.87-1.11] | 0.93   | -0.7 [(-5.3)-3.9]     |
| Voice disorder            | 149,016 | 443   | 31.8 [28.9-35.0]    | 395   | 30.9 [28.0-34.1]    | 1.04 [0.91-1.19] | 0.84   | 0.9 [(-3.4)-5.2]      |
| Weakness                  | 139,581 | 2,806 | 219.5 [211.5-227.8] | 2,107 | 169.3 [162.3-176.6] | 1.30 [1.22-1.37] | <0.001 | 50.2 [39.4-61.1]      |
| Weight loss               | 149,134 | 310   | 24.7 [22.2-27.5]    | 408   | 28.2 [25.6-31.2]    | 0.88 [0.76-1.01] | 0.26   | -3.6 [(-7.5)-0.3]     |



**Table S2d** - Risk difference of health outcomes in unvaccinated individuals, 30-360 days post-PCR test and evaluation of recurring reports

| <b>Outcome</b>                         | <b>Risk Diff/10,000 persons for 30-360 days</b> |
|----------------------------------------|-------------------------------------------------|
| Abdominal pain                         | -20.2 [(-40.7)-0.4]                             |
| Anosmia and Dysgeusia                  | 27.1 [23.6-30.7]                                |
| Anxiety                                | 4.6 [(-3.2)-12.4]                               |
| Appendicitis                           | -2.5 [(-5.3)-0.3]                               |
| Arthralgia                             | 15.5 [6.6-24.5]                                 |
| Bloody stool                           | 0.4 [(-3.3)-4.1]                                |
| Cardiac arrhythmias                    | 0.2 [(-3.2)-3.5]                                |
| Celiac disease                         | -2.7 [(-5.4)-0.0]                               |
| Cerebral hemorrhage                    | -0.6 [(-1.7)-0.4]                               |
| Chest pain                             | 57.2 [43.5-70.9]                                |
| Chronic interstitial pulmonary disease | 0.6 [0.1-1.2]                                   |
| Chronic kidney disease                 | 0.4 [(-1.3)-2.2]                                |
| Concentration and memory impairment    | 22.4 [17.5-27.3]                                |
| Congestive heart failure               | -2.0 [(-3.8)-(-0.3)]                            |
| Conjunctivitis                         | 8.4 [(-5.6)-22.3]                               |
| Convulsions                            | 0.1 [(-2.3)-2.4]                                |
| Cough                                  | 32.6 [14.4-50.8]                                |
| Depression                             | 0.5 [(-4.2)-5.3]                                |
| Diabetes Mellitus                      | 6.0 [2.1-9.9]                                   |
| Diarrhea                               | -1.3 [(-2.8)-0.2]                               |
| Diseases of the nervous system         | 8.1 [2.3-13.9]                                  |
| Diseases of the pleura                 | -0.1 [(-1.1)-0.9]                               |
| Dizziness                              | 26.7 [16.6-36.8]                                |
| Dyspnea                                | 107.4 [95.4-119.4]                              |
| Encephalitis                           | -0.4 [(-1.3)-0.4]                               |
| Epilepsy                               | 0.2 [(-1.7)-2.1]                                |
| Fatty Liver                            | 11.4 [5.7-17.1]                                 |
| Guillian-Barre syndrome                | 0.0 [(-0.7)-0.7]                                |
| Hair loss                              | 26.2 [19.0-33.5]                                |
| Headache                               | -5.7 [(-21.2)-9.8]                              |
| Herpes Simplex                         | 3.9 [(-1.1)-9.0]                                |
| Herpes Zoster                          | -4.1 [(-8.7)-0.4]                               |
| Hospitalization                        | 7.1 [(-7.0)-21.2]                               |
| Hyperhidrosis                          | -0.6 [(-2.3)-1.0]                               |
| Hyperreactive Airway Disease           | 11.0 [2.8-19.2]                                 |
| Hypertension                           | 9.2 [4.4-14.1]                                  |
| Insomnia                               | 0.3 [(-1.2)-1.9]                                |
| Invasive pneumococcal                  | -0.1 [(-2.2)-2]                                 |
| Ischemic heart disease                 | -4.1 [(-7.5)-(-0.7)]                            |
| Ischemic stroke and TIA                | -1.4 [(-3.5)-0.6]                               |
| Kawasaki disease, PIMS                 | -0.1 [(-0.6)-0.4]                               |
| Loss of appetite                       | -3.6 [(-10.4)-3.1]                              |
| Lymphadenopathy                        | -13.8 [(-20.2)-(-7.3)]                          |
| Menstruation abnormalities             | -3.5 [(-10.5)-3.6]                              |
| Muscle atrophy                         | 1.42 [(-0.8)-3.6]                               |

|                           |                     |
|---------------------------|---------------------|
| Myalgia                   | 19.0 [9.7-28.3]     |
| Myocarditis               | 0.7 [(-0.2)-1.5]    |
| Nausea or vomiting        | -6.6 [(-16.8)-3.5]  |
| Palpitations              | 25.9 [18.3-33.5]    |
| Paresthesia               | -5.4 [(-12.7)-1.9]  |
| Parkinsonism              | 0.0 [(-1.1)-1.1]    |
| Pericarditis              | 1.6 [0.1-3.1]       |
| Psychosis                 | -2.2 [(-4.4)-0.0]   |
| Pulmonary disease         | 0.3 [(-2.0)-2.5]    |
| Respiratory disorders     | 3.4 [1.5-5.4]       |
| Respiratory failure       | -0.4 [(-1.3)-0.5]   |
| Rhinorrhea                | -0.7 [(-2.9)-1.5]   |
| Skin rash                 | -3.3 [(-12.8)-6.2]  |
| Sore throat               | -1.2 [(-8.7)-6.3]   |
| Streptococcal tonsillitis | 31.8 [20.7-42.8]    |
| Tinnitus                  | 1.0 [(-5.5)-7.4]    |
| Tremor                    | 0.0 [(-3.3)-3.2]    |
| Venous thromboembolism    | 0.6 [(-3.0)-4.3]    |
| Visual disturbances       | 1.0 [(-4.8)-6.7]    |
| Voice disorder            | 4.0 [(-1.3)-9.4]    |
| Weakness                  | 136.0 [121.8-150.1] |
| Weight loss               | -4.6 [(-9.6)-0.3]   |

**Figure S2 – Monthly HR of Fatty liver and AST, ALT glucose and hemoglobin blood tests for COVID-19 patients.**

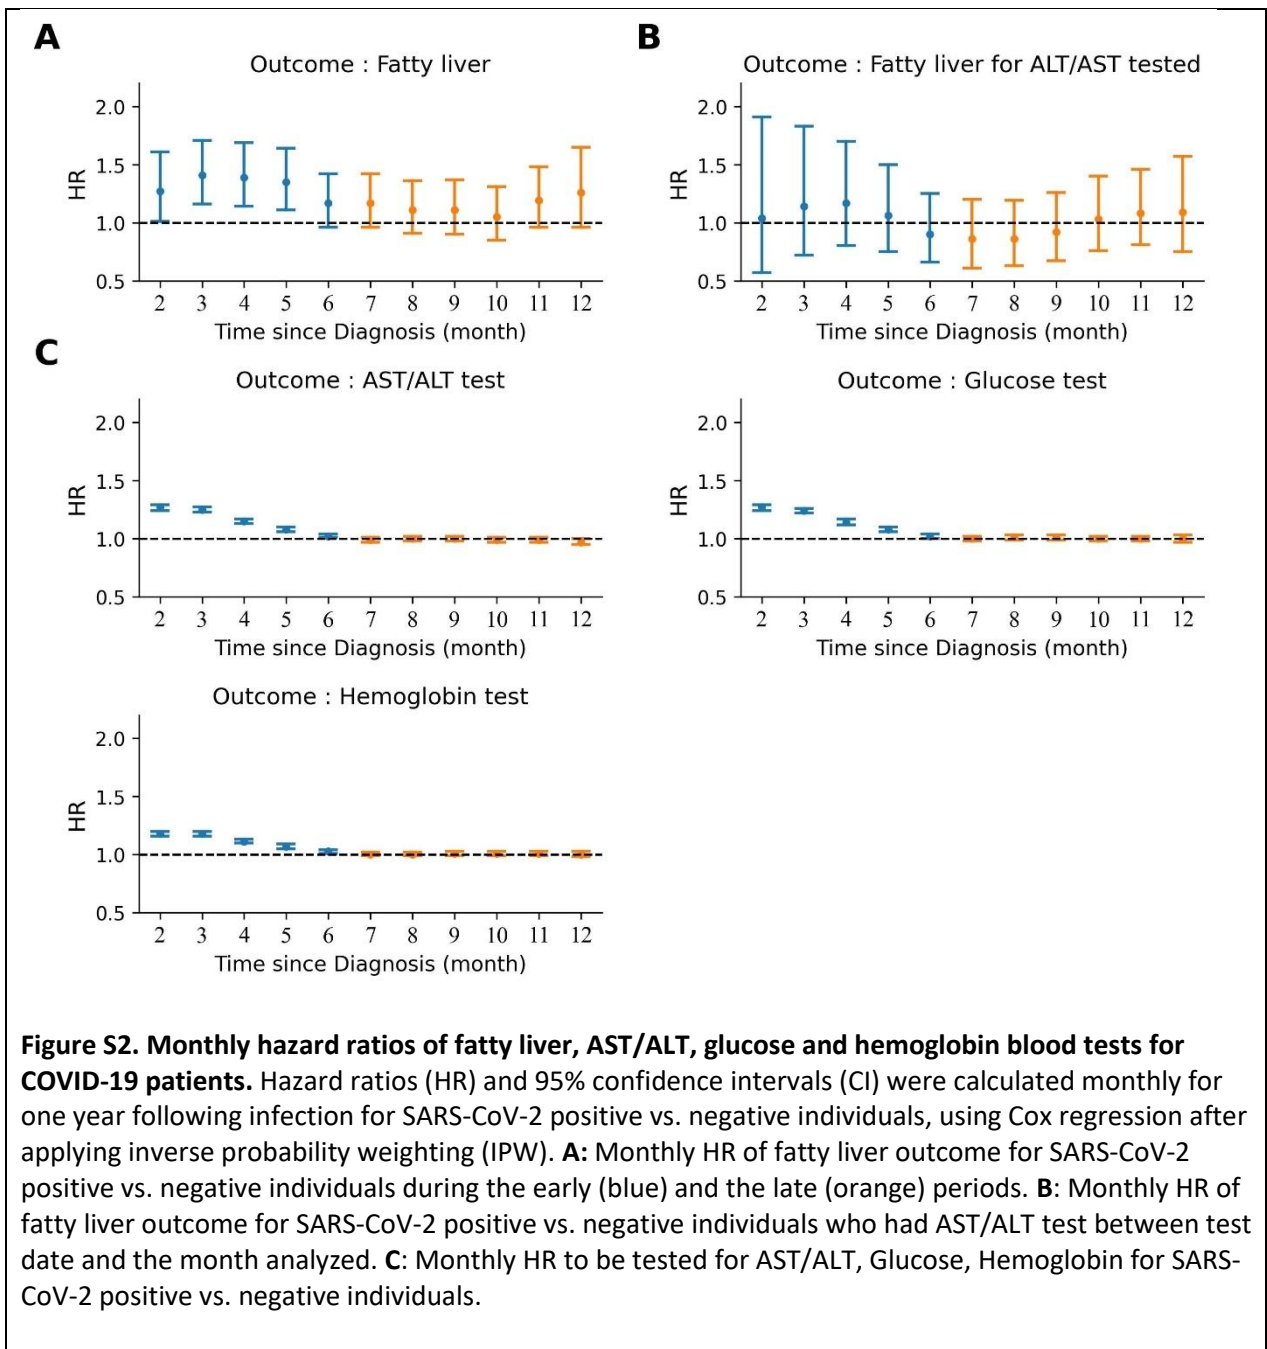

**Figure S2. Monthly hazard ratios of fatty liver, AST/ALT, glucose and hemoglobin blood tests for COVID-19 patients.** Hazard ratios (HR) and 95% confidence intervals (CI) were calculated monthly for one year following infection for SARS-CoV-2 positive vs. negative individuals, using Cox regression after applying inverse probability weighting (IPW). **A:** Monthly HR of fatty liver outcome for SARS-CoV-2 positive vs. negative individuals during the early (blue) and the late (orange) periods. **B:** Monthly HR of fatty liver outcome for SARS-CoV-2 positive vs. negative individuals who had AST/ALT test between test date and the month analyzed. **C:** Monthly HR to be tested for AST/ALT, Glucose, Hemoglobin for SARS-CoV-2 positive vs. negative individuals.

**Table S2e** - Association of health outcomes with SARS-CoV-2 infection in unvaccinated individuals, during Wild-Type and Alpha variants, monthly after PCR test

| Outcome                             | Hazard ratio<br>95%CI<br>Month2 | Hazard ratio<br>95%CI<br>Month3 | Hazard ratio<br>95%CI<br>Month4 | Hazard ratio<br>95%CI<br>Month5 | Hazard ratio<br>95%CI<br>Month6 | Hazard ratio<br>95%CI<br>Month7 | Hazard ratio<br>95%CI<br>Month8 | Hazard ratio<br>95%CI<br>Month9 | Hazard ratio<br>95%CI<br>Month10 | Hazard ratio<br>95%CI<br>Month11 | Hazard ratio<br>95%CI<br>Month12 |
|-------------------------------------|---------------------------------|---------------------------------|---------------------------------|---------------------------------|---------------------------------|---------------------------------|---------------------------------|---------------------------------|----------------------------------|----------------------------------|----------------------------------|
| Anosmia and Dysgeusia               | 4.29 [3.03-6.08]                | 4.18 [3.13-5.58]                | 5.34 [3.94-7.24]                | 5.05 [3.73-6.84]                | 5.58 [4.02-7.76]                | 4.47 [3.19-6.27]                | 4.12 [2.87-5.92]                | 2.66 [1.92-3.69]                | 2.24 [1.62-3.08]                 | 2.21 [1.57-3.10]                 | 2.37 [1.52-3.70]                 |
| Arthralgia                          | 1.12 [0.98-1.27]                | 1.08 [0.97-1.20]                | 1.07 [0.96-1.18]                | 1.11 [1.00-1.23]                | 1.19 [1.07-1.32]                | 1.24 [1.12-1.38]                | 1.28 [1.15-1.43]                | 1.17 [1.05-1.31]                | 1.08 [0.97-1.20]                 | 1.11 [0.99-1.24]                 | 1.12 [0.97-1.28]                 |
| Chest pain                          | 1.65 [1.52-1.79]                | 1.53 [1.43-1.65]                | 1.37 [1.27-1.47]                | 1.27 [1.18-1.37]                | 1.18 [1.1-1.27]                 | 1.16 [1.08-1.25]                | 1.08 [1.01-1.16]                | 1.06 [0.98-1.14]                | 1.02 [0.95-1.10]                 | 1.01 [0.94-1.10]                 | 0.98 [0.89-1.08]                 |
| Concentration and memory impairment | 1.69 [1.33-2.16]                | 1.95 [1.60-2.37]                | 2.08 [1.71-2.53]                | 1.99 [1.64-2.42]                | 1.97 [1.61-2.40]                | 2.03 [1.66-2.48]                | 1.90 [1.56-2.32]                | 1.67 [1.37-2.03]                | 1.55 [1.27-1.89]                 | 1.50 [1.22-1.84]                 | 1.50 [1.18-1.91]                 |
| Cough                               | 1.21 [1.13-1.3]                 | 1.14 [1.08-1.21]                | 1.04 [0.98-1.10]                | 1.02 [0.97-1.08]                | 1.04 [0.99-1.11]                | 1.03 [0.97-1.09]                | 1.06 [1.00-1.13]                | 1.06 [0.99-1.12]                | 1.07 [1.00-1.13]                 | 1.07 [1.00-1.14]                 | 1.05 [0.97-1.13]                 |
| Dizziness                           | 1.09 [0.97-1.23]                | 1.09 [0.99-1.20]                | 1.13 [1.03-1.25]                | 1.15 [1.05-1.27]                | 1.19 [1.09-1.31]                | 1.2 [1.09-1.32]                 | 1.23 [1.12-1.36]                | 1.18 [1.07-1.30]                | 1.14 [1.03-1.25]                 | 1.12 [1.01-1.23]                 | 1.09 [0.97-1.23]                 |
| Dyspnea                             | 2.26 [2.06-2.47]                | 2.04 [1.89-2.20]                | 1.74 [1.62-1.88]                | 1.56 [1.45-1.68]                | 1.50 [1.39-1.62]                | 1.4 [1.29-1.52]                 | 1.36 [1.24-1.48]                | 1.32 [1.21-1.43]                | 1.28 [1.17-1.39]                 | 1.25 [1.14-1.37]                 | 1.23 [1.10-1.38]                 |
| Fatty Liver                         | 1.27 [1.01-1.61]                | 1.41 [1.16-1.71]                | 1.39 [1.14-1.69]                | 1.35 [1.11-1.64]                | 1.17 [0.96-1.42]                | 1.17 [0.96-1.42]                | 1.11 [0.91-1.36]                | 1.11 [0.90-1.37]                | 1.05 [0.85-1.31]                 | 1.19 [0.96-1.48]                 | 1.26 [0.96-1.65]                 |
| Hair loss                           | 1.40 [1.21-1.62]                | 1.74 [1.55-1.96]                | 2.17 [1.92-2.44]                | 2.06 [1.82-2.33]                | 1.71 [1.50-1.95]                | 1.12 [0.97-1.29]                | 1.02 [0.88-1.19]                | 0.93 [0.80-1.08]                | 0.91 [0.78-1.05]                 | 0.82 [0.71-0.95]                 | 0.70 [0.58-0.85]                 |
| Myalgia                             | 1.25 [1.11-1.42]                | 1.28 [1.16-1.41]                | 1.19 [1.08-1.32]                | 1.25 [1.13-1.38]                | 1.16 [1.05-1.29]                | 1.16 [1.05-1.29]                | 1.11 [1.00-1.23]                | 1.14 [1.03-1.27]                | 1.06 [0.95-1.18]                 | 1.05 [0.94-1.18]                 | 1.04 [0.90-1.19]                 |
| Palpitations                        | 1.76 [1.53-2.02]                | 1.64 [1.46-1.84]                | 1.34 [1.19-1.51]                | 1.34 [1.19-1.51]                | 1.32 [1.17-1.50]                | 1.25 [1.10-1.42]                | 1.14 [1.01-1.30]                | 1.13 [1.00-1.29]                | 1.20 [1.05-1.36]                 | 1.17 [1.02-1.34]                 | 1.11 [0.93-1.32]                 |
| Respiratory disorders               | 2.67 [1.67-4.29]                | 2.34 [1.56-3.51]                | 2.01 [1.22-3.30]                | 2.11 [1.19-3.74]                | 2.31 [1.16-4.60]                | 0.72 [0.36-1.41]                | 0.54 [0.27-1.07]                | 0.53 [0.28-1.01]                | 1.10 [0.58-2.09]                 | 1.41 [0.70-2.85]                 | 2.12 [0.77-5.85]                 |
| Streptococcal tonsillitis           | 1.08 [0.94-1.24]                | 1.08 [0.97-1.20]                | 1.14 [1.04-1.26]                | 1.21 [1.10-1.33]                | 1.27 [1.15-1.40]                | 1.21 [1.10-1.34]                | 1.19 [1.08-1.31]                | 1.09 [1.00-1.20]                | 1.09 [1.00-1.18]                 | 1.10 [1.01-1.20]                 | 1.17 [1.05-1.30]                 |
| Weakness                            | 2.14 [1.97-2.31]                | 2.05 [1.92-2.19]                | 1.74 [1.63-1.87]                | 1.62 [1.51-1.73]                | 1.45 [1.35-1.55]                | 1.39 [1.30-1.50]                | 1.29 [1.20-1.39]                | 1.23 [1.14-1.32]                | 1.28 [1.18-1.38]                 | 1.33 [1.23-1.44]                 | 1.40 [1.27-1.55]                 |

## Respiratory related outcomes

**Table S3** - Respiratory related outcomes associated with SARS-CoV-2 infection in unvaccinated individuals, from all age groups, during Wild-Type and Alpha variants, 30-360 days post PCR test, by medication prescription

| Outcome                                          | N       | Patients with no new medication prescription |                     |                     | Patients with new medication prescription** |                     |                    | Percent with med new prescription out of patients with outcome |                     |
|--------------------------------------------------|---------|----------------------------------------------|---------------------|---------------------|---------------------------------------------|---------------------|--------------------|----------------------------------------------------------------|---------------------|
|                                                  |         | SARS-CoV-2 Positive                          | SARS-CoV-2 Negative | RD 95% CI           | SARS-CoV-2 Positive                         | SARS-CoV-2 Negative | RD 95% CI          | SARS-CoV-2 Positive                                            | SARS-CoV-2 Negative |
| At least one of the Respiratory Related Outcomes | 159,507 | 3703                                         | 2580                | 92.6 [81.3 – 103.9] | 1,157                                       | 828                 | 25.7 [18.1 – 33.3] | 23.8%                                                          | 24.3%               |
| Dyspnea                                          | 160,741 | 3423                                         | 2325                | 90.2 [79.5 – 100.9] | 984                                         | 691                 | 21.6 [14.6 - 28.5] | 22.3%                                                          | 22.9%               |
| Hyperreactive Airway Disease                     | 98,841  | 407                                          | 370                 | 4.6 [(-1.9) – 11.1] | 285                                         | 228                 | 7.0 [1.0 - 13.0]   | 41.2%                                                          | 38.1%               |
| Respiratory disorders                            | 166,678 | 101                                          | 70                  | 2.2 [0.5 – 4.0]     | 26                                          | 9                   | 1.5 [0.5 – 2.5]    | 20.5%                                                          | 11.4%               |
| Respiratory failure                              | 168,387 | 18                                           | 18                  | 0.0 [(-0.9) – 0.8]  | 0                                           | 4                   |                    |                                                                |                     |
| Acute respiratory distress syndrome              | 168,368 | 5                                            | 2                   |                     | 1                                           | 0                   |                    |                                                                |                     |

\* At least one of the respiratory related outcomes

\*\*Patients with prior drug usage (up to 5 years before SARS-CoV-2 PCR test) were excluded from analysis; prescription drugs analyzed were drugs for obstructive airway disease (ATC R03).RD was calculated for outcomes with more than 10 occurrence.

## Analysis by age subgroups

**Table S4a**– Association of health outcomes\* with SARS-CoV-2 infection in unvaccinated individuals during Wild-Type and Alpha variants, 30-180 days post PCR test, age 0-4 years.

| Outcome                      | N      | SARS-CoV-2 Positive |                                         | SARS-CoV-2 Negative |                                         | Hazard Ratio<br>95%CI | Q value | Risk Diff/<br>10,000 persons |
|------------------------------|--------|---------------------|-----------------------------------------|---------------------|-----------------------------------------|-----------------------|---------|------------------------------|
|                              |        | No. events          | Absolute risk/10,000 persons<br>[95%CI] | No. events          | Absolute risk/10,000 persons<br>[95%CI] |                       |         |                              |
| Abdominal pain               | 11,155 | 196                 | 192.5 [164.3-220.7]                     | 228                 | 198.8 [171.3-226.3]                     | 0.97 [0.81-1.17]      | 0.93    | -5.1 [(-44.4)-34.2]          |
| Anxiety                      | 11,780 | 8                   | 7.7 [2.3-13.2]                          | 10                  | 8.9 [2.8-14.9]                          | 0.87 [0.36-2.11]      | 0.93    | -1.1 [(-9.3)-7.0]            |
| Arthralgia                   | 11,784 | 8                   | 6.4 [1.9-10.9]                          | 5                   | 4.8 [0.1-9.5]                           | 1.34 [0.45-3.96]      | 0.86    | 1.6 [(-4.9)-8.1]             |
| Bloody stool                 | 11,701 | 8                   | 8.3 [2.4-14.2]                          | 14                  | 12.1 [5.3-19.0]                         | 0.69 [0.31-1.53]      | 0.66    | -3.8 [(-12.9)-5.2]           |
| Celiac disease               | 11,766 | 9                   | 6.5 [2.1-10.9]                          | 18                  | 13.0 [6.7-19.2]                         | 0.5 [0.21-1.16]       | 0.32    | -6.5 [(-14.2)-1.2]           |
| Conjunctivitis               | 8,531  | 777                 | 960.1 [889.5-1030.7]                    | 688                 | 812.8 [747.7-877.9]                     | 1.18 [1.08-1.29]      | 0.002   | 147.3 [51.3-243.3]           |
| Convulsions                  | 11,435 | 35                  | 34.4 [22.8-45.9]                        | 28                  | 25.9 [15.7-36.1]                        | 1.33 [0.89-1.99]      | 0.42    | 8.5 [(-6.9)-23.9]            |
| Cough                        | 7,637  | 932                 | 1391.9 [1299.6-1484.1]                  | 910                 | 1209.6 [1125.6-1293.6]                  | 1.13 [1.03-1.25]      | 0.08    | 161.9 [38.1-285.6]           |
| Diarrhea                     | 11,779 | 6                   | 6.0 [1.2-10.8]                          | 5                   | 4.7 [0.2-9.2]                           | 1.27 [0.49-3.31]      | 0.87    | 1.3 [(-5.3)-7.8]             |
| Dyspnea                      | 9,783  | 636                 | 663.8 [609.9-717.7]                     | 505                 | 544.1 [493.4-594.8]                     | 1.22 [1.11-1.35]      | <0.001  | 121.9 [47.8-196.0]           |
| Epilepsy                     | 11,715 | 10                  | 9.1 [3.2-14.9]                          | 5                   | 3.6 [0.4-6.9]                           | 2.49 [0.83-7.44]      | 0.31    | 5.4 [(-1.3)-12.1]            |
| Hair loss                    | 11,769 | 10                  | 7.6 [2.7-12.4]                          | 9                   | 7.3 [2.0-12.5]                          | 1.04 [0.41-2.67]      | 0.99    | 0.3 [(-6.9)-7.5]             |
| Headache                     | 11,714 | 20                  | 16.9 [9.3-24.6]                         | 37                  | 28.8 [18.9-38.6]                        | 0.59 [0.34-1.03]      | 0.23    | -11.8 [(-24.3)-0.6]          |
| Herpes Simplex               | 11,348 | 32                  | 30.7 [19.6-41.7]                        | 25                  | 20.7 [11.9-29.5]                        | 1.48 [0.89-2.46]      | 0.37    | 9.9 [(-4.2)-24.1]            |
| Herpes Zoster                | 11,784 | 5                   | 5.2 [0.5-9.9]                           | 6                   | 4.1 [0.8-7.5]                           | 1.26 [0.39-4.08]      | 0.92    | 1.1 [(-4.7)-6.8]             |
| Hospitalization              | 10,408 | 240                 | 232.5 [201.7-263.3]                     | 198                 | 196.6 [166.9-226.3]                     | 1.16 [0.95-1.42]      | 0.4     | 37.0 [(-7.7)-81.6]           |
| Hyperreactive Airway Disease | 9,619  | 186                 | 203.1 [172.8-233.3]                     | 171                 | 172.6 [145.3-199.9]                     | 1.16 [0.93-1.44]      | 0.44    | 28.2 [(-12.3)-68.7]          |
| Invasive pneumococcal        | 11,570 | 26                  | 21.2 [12.6-29.9]                        | 24                  | 21.1 [12.3-29.9]                        | 1.01 [0.67-1.52]      | 1       | 0.2 [(-12.2)-12.5]           |
| Loss of appetite             | 11,398 | 71                  | 62.2 [47.1-77.3]                        | 61                  | 54.0 [39.5-68.5]                        | 1.15 [0.83-1.6]       | 0.69    | 8.2 [(-12.7)-29.2]           |
| Lymphadenopathy              | 11,564 | 51                  | 51.0 [36.6-65.5]                        | 68                  | 58.5 [43.4-73.7]                        | 0.87 [0.62-1.22]      | 0.72    | -7.5 [(-28.4)-13.5]          |
| Myalgia                      | 11,794 | 7                   | 6.8 [1.7-11.9]                          | 5                   | 4.2 [0.2-8.2]                           | 1.61 [0.53-4.93]      | 0.7     | 2.6 [(-3.9)-9.1]             |

|                           |        |     |                     |     |                     |                  |      |                      |
|---------------------------|--------|-----|---------------------|-----|---------------------|------------------|------|----------------------|
| Nausea or vomiting        | 10,513 | 257 | 262.4 [229.2-295.6] | 301 | 285.1 [250.7-319.5] | 0.92 [0.79-1.07] | 0.59 | -22.7 [(-70.5)-25.1] |
| Rhinorrhea                | 11,706 | 20  | 15.9 [8.6-23.2]     | 20  | 16.5 [8.9-24.1]     | 0.96 [0.54-1.71] | 0.98 | -0.6 [(-11.2)-9.9]   |
| Skin rash                 | 9,611  | 353 | 400.3 [357.1-443.5] | 349 | 356.4 [316.6-396.3] | 1.12 [0.99-1.27] | 0.25 | 43.9 [(-14.9)-102.7] |
| Sore throat               | 11,715 | 21  | 17.7 [9.7-25.6]     | 25  | 21.8 [12.5-31.0]    | 0.81 [0.45-1.45] | 0.77 | -4.1 [(-16.3)-8.1]   |
| Streptococcal tonsillitis | 11,040 | 225 | 209.4 [180.7-238.2] | 240 | 238.6 [206.1-271.1] | 0.88 [0.76-1.01] | 0.25 | -29.2 [(-72.6)-14.2] |
| Tinnitus                  | 11,730 | 17  | 14.3 [7.2-21.4]     | 7   | 7.8 [1.3-14.4]      | 1.83 [0.82-4.05] | 0.37 | 6.5 [(-3.2)-16.1]    |
| Visual disturbances       | 11,746 | 20  | 20.1 [11.1-29.2]    | 21  | 16.3 [8.9-23.7]     | 1.24 [0.69-2.23] | 0.77 | 3.9 [(-7.8)-15.6]    |
| Voice disorder            | 11,713 | 34  | 32.1 [21.0-43.1]    | 38  | 31.5 [21.0-42.0]    | 1.02 [0.66-1.58] | 0.99 | 0.6 [(-14.6)-15.8]   |
| Weakness                  | 11,662 | 38  | 34.2 [22.8-45.6]    | 34  | 30.9 [19.5-42.2]    | 1.11 [0.71-1.74] | 0.88 | 3.4 [(-12.7)-19.5]   |
| Weight loss               | 11,769 | 7   | 5.2 [1.3-9.1]       | 8   | 7.0 [1.7-12.3]      | 0.74 [0.26-2.11] | 0.84 | -1.8 [(-8.3)-4.8]    |

\* Outcomes with 10 events or more.

**Table S4b** – Association of health outcomes\* with SARS-CoV-2 infection in unvaccinated individuals during Wild-Type and Alpha variants, 30-180 days post PCR test, age 5-11 years.

| Outcome                             | N      | SARS-CoV-2 Positive |                                               | SARS-CoV-2 Negative |                                               | Hazard Ratio<br>95%CI | Q<br>value | Risk Diff/10,000<br>persons |
|-------------------------------------|--------|---------------------|-----------------------------------------------|---------------------|-----------------------------------------------|-----------------------|------------|-----------------------------|
|                                     |        | No.<br>events       | Absolute<br>risk/10,000<br>persons<br>[95%CI] | No.<br>events       | Absolute<br>risk/10,000<br>persons<br>[95%CI] |                       |            |                             |
| Abdominal pain                      | 19,237 | 493                 | 283.1 [257.2-308.9]                           | 597                 | 304.3 [278.8-329.8]                           | 0.93 [0.83-1.05]      | 0.53       | -20.3 [(-56.6)-16.0]        |
| Anxiety                             | 21,566 | 62                  | 32.2 [23.9-40.5]                              | 65                  | 29.0 [21.6-36.3]                              | 1.11 [0.8-1.56]       | 0.80       | 3.3 [(-7.8)-14.4]           |
| Appendicitis                        | 21,965 | 19                  | 10.0 [5.4-14.5]                               | 20                  | 8.2 [4.5-12.0]                                | 1.21 [0.68-2.16]      | 0.79       | 1.7 [(-4.2)-7.6]            |
| Arthralgia                          | 22,189 | 32                  | 14.9 [9.5-20.2]                               | 27                  | 11.5 [7.0-15.9]                               | 1.3 [0.77-2.19]       | 0.63       | 3.4 [(-3.6)-10.3]           |
| Bloody stool                        | 22,244 | 15                  | 8.1 [3.9-12.3]                                | 12                  | 5.6 [2.2-9.0]                                 | 1.46 [0.71-2.99]      | 0.61       | 2.5 [(-2.9)-8.0]            |
| Celiac disease                      | 22,082 | 16                  | 7.5 [3.6-11.4]                                | 23                  | 10.1 [5.7-14.4]                               | 0.75 [0.41-1.36]      | 0.65       | -2.5 [(-8.4)-3.3]           |
| Chest pain                          | 21,976 | 89                  | 45.0 [35.3-54.6]                              | 79                  | 34.7 [26.7-42.7]                              | 1.3 [0.96-1.75]       | 0.29       | 10.3 [(-2.3)-22.8]          |
| Concentration and memory impairment | 22,275 | 6                   | 2.9 [0.5-5.4]                                 | 9                   | 3.8 [1.3-6.2]                                 | 0.78 [0.28-2.19]      | 0.87       | -0.8 [(-4.3)-2.7]           |
| Conjunctivitis                      | 20,310 | 364                 | 185.4 [165.5-205.2]                           | 308                 | 149.7 [132.0-167.3]                           | 1.24 [1.07-1.43]      | 0.03       | 35.7 [9.1-62.3]             |
| Convulsions                         | 20,980 | 9                   | 4.6 [1.5-7.8]                                 | 10                  | 4.8 [1.8-7.8]                                 | 0.96 [0.41-2.27]      | 0.99       | -0.1 [(-4.5)-4.2]           |
| Cough                               | 18,548 | 521                 | 304.3 [277.3-331.3]                           | 553                 | 293.7 [268.2-319.3]                           | 1.04 [0.93-1.16]      | 0.80       | 10.6 [(-26.6)-47.8]         |
| Diseases of the nervous system      | 22,152 | 5                   | 2.3 [0.2-4.4]                                 | 7                   | 3.2 [0.7-5.8]                                 | 0.72 [0.23-2.26]      | 0.84       | -0.9 [(-4.2)-2.4]           |
| Dizziness                           | 2,187  | 23                  | 11.4 [6.5-16.3]                               | 36                  | 15.6 [10.3-20.8]                              | 0.73 [0.44-1.23]      | 0.54       | -4.1 [(-11.3)-3.0]          |
| Dyspnea                             | 1,510  | 150                 | 72.0 [60.0-83.9]                              | 144                 | 66.5 [55.1-77.9]                              | 1.08 [0.87-1.35]      | 0.77       | 6.3 [(-10.2)-22.8]          |
| Epilepsy                            | 1,925  | 9                   | 4.4 [1.4-7.3]                                 | 19                  | 9.5 [5.1-13.9]                                | 0.46 [0.22-0.96]      | 0.18       | -5.1 [(-10.5)-0.2]          |
| Hair loss                           | 2,186  | 16                  | 7.2 [3.5-10.9]                                | 17                  | 8.2 [4.0-12.5]                                | 0.88 [0.44-1.73]      | 0.92       | -1.0 [(-6.6)-4.6]           |
| Headache                            | 21,015 | 224                 | 115.5 [99.8-131.2]                            | 238                 | 112.2 [97.2-127.1]                            | 1.03 [0.86-1.23]      | 0.92       | 3.4 [(-18.3)-25.0]          |
| Herpes Simplex                      | 19,794 | 32                  | 18.3 [11.8-24.8]                              | 32                  | 17.1 [10.7-23.4]                              | 1.07 [0.67-1.71]      | 0.93       | 1.2 [(-7.9)-10.3]           |
| Herpes Zoster                       | 22,264 | 14                  | 6.6 [3.0-10.1]                                | 9                   | 4.6 [1.4-7.8]                                 | 1.44 [0.65-3.19]      | 0.67       | 2.0 [(-2.8)-6.8]            |
| Hospitalization                     | 21,358 | 149                 | 72.7 [60.6-84.9]                              | 144                 | 68.6 [56.8-80.4]                              | 1.04 [0.82-1.33]      | 0.85       | 4.7 [(-12.8)-22.2]          |
| Hyperreactive Airway Disease        | 13,724 | 30                  | 21.6 [13.5-29.7]                              | 32                  | 23.8 [15.2-32.3]                              | 0.91 [0.59-1.4]       | 0.89       | -2.1 [(-14.0)-9.7]          |
| Invasive pneumococcal               | 21,307 | 9                   | 4.6 [1.5-7.7]                                 | 1                   | 0.4 [-0.4-1.2]                                | 11.52 [1.22-109.07]   | 0.16       | 4.2 [1.0-7.4]               |
| Loss of appetite                    | 22,044 | 50                  | 25.6 [18.2-                                   | 51                  | 22.2 [15.8-                                   | 1.15 [0.79-           | 0.75       | 3.4 [(-6.4)-13.2]           |



|                           |        |     |                     |     |                     |                  |        |                     |
|---------------------------|--------|-----|---------------------|-----|---------------------|------------------|--------|---------------------|
|                           |        |     | 33.0]               |     | 28.6]               | 1.68]            |        |                     |
| Lymphadenopathy           | 21,966 | 62  | 33.5 [24.9-42.0]    | 70  | 33.1 [24.8-41.5]    | 1.01 [0.74-1.39] | 1.00   | 0.3 [(-11.6)-12.3]  |
| Myalgia                   | 22,149 | 32  | 15.1 [9.7-20.5]     | 40  | 18.4 [12.3-24.6]    | 0.82 [0.52-1.3]  | 0.69   | -3.3 [(-11.5)-4.9]  |
| Nausea or vomiting        | 1,380  | 200 | 99.7 [85.4-113.9]   | 182 | 83.3 [70.7-95.8]    | 1.2 [0.99-1.45]  | 0.25   | 16.4 [(-2.6)-35.4]  |
| Palpitations              | 22,228 | 15  | 7.5 [3.6-11.4]      | 21  | 9.1 [5.0-13.1]      | 0.83 [0.43-1.59] | 0.84   | -1.6 [(-7.1)-4.0]   |
| Rhinorrhea                | 22,253 | 8   | 3.8 [1.1-6.4]       | 10  | 4.1 [1.5-6.6]       | 0.93 [0.37-2.32] | 0.98   | -0.3 [(-4.0)-3.4]   |
| Skin rash                 | 20,759 | 203 | 104.7 [89.7-119.7]  | 236 | 109.0 [94.3-123.6]  | 0.96 [0.81-1.14] | 0.88   | -4.3 [(-25.2)-16.7] |
| Sore throat               | 21,550 | 112 | 52.3 [42.2-62.5]    | 113 | 52.7 [42.5-63.0]    | 0.99 [0.77-1.28] | 1.00   | -0.4 [(-14.8)-14.0] |
| Streptococcal tonsillitis | 19,212 | 520 | 252.5 [229.2-275.8] | 326 | 201.8 [178.7-224.9] | 1.25 [1.15-1.36] | <0.001 | 50.7 [17.9-83.5]    |
| Tinnitus                  | 22,211 | 20  | 8.5 [4.6-12.4]      | 12  | 4.7 [2.0-7.4]       | 1.8 [0.84-3.87]  | 0.37   | 3.8 [(-0.9)-8.5]    |
| Visual disturbances       | 21,980 | 41  | 17.9 [12.2-23.6]    | 40  | 21.1 [14.1-28.0]    | 0.85 [0.56-1.28] | 0.73   | -3.2 [(-12.2)-5.8]  |
| Voice disorder            | 22,101 | 47  | 21.6 [15.2-28.1]    | 39  | 18.2 [12.1-24.3]    | 1.19 [0.79-1.79] | 0.70   | 3.4 [(-5.5)-12.3]   |
| Weakness                  | 21,969 | 83  | 37.6 [29.0-46.1]    | 50  | 25.8 [18.0-33.6]    | 1.46 [1.04-2.05] | 0.15   | 11.8 [0.2-23.4]     |
| Weight loss               | 22,267 | 4   | 2.6 [0.0-5.1]       | 9   | 4.5 [1.5-7.4]       | 0.57 [0.2-1.62]  | 0.59   | -1.9 [(-5.8)-2.0]   |

\* Outcomes with 10 events or more.

**Table S4c** – Association of health outcomes\* with SARS-CoV-2 infection in unvaccinated individuals during Wild-Type and Alpha variants, 30-180 days post PCR test, age 12-18 years.

| Outcome                             | N      | SARS-CoV-2 Positive |                                               | SARS-CoV-2 Negative |                                               | Hazard Ratio<br>95%CI | Q<br>value | Risk Diff/10,000<br>persons |
|-------------------------------------|--------|---------------------|-----------------------------------------------|---------------------|-----------------------------------------------|-----------------------|------------|-----------------------------|
|                                     |        | No.<br>events       | Absolute<br>risk/10,000<br>persons<br>[95%CI] | No.<br>events       | Absolute<br>risk/10,000<br>persons<br>[95%CI] |                       |            |                             |
| Abdominal pain                      | 24,052 | 547                 | 255.6 [233.3-277.8]                           | 632                 | 269.2 [247.2-291.2]                           | 0.95 [0.85-1.06]      | 0.69       | -12.5 [(-43.8)-18.8]        |
| Anosmia and Dysgeusia               | 27,652 | 37                  | 16.3 [10.9-21.7]                              | 2                   | 0.7 [-0.3-1.7]                                | 23.5 [5.48-100.86]    | <0.001     | 15.6 [10.1-21.0]            |
| Anxiety                             | 25,124 | 84                  | 38.7 [30.2-47.3]                              | 98                  | 36.9 [29.3-44.5]                              | 1.05 [0.79-1.39]      | 0.92       | 1.9 [(-9.6)-13.3]           |
| Appendicitis                        | 26,233 | 19                  | 8.3 [4.5-12.2]                                | 31                  | 12.1 [7.7-16.6]                               | 0.69 [0.41-1.14]      | 0.38       | -3.8 [(-9.7)-2.1]           |
| Arthralgia                          | 27,217 | 75                  | 30.4 [23.3-37.6]                              | 86                  | 30.3 [23.7-36.9]                              | 1.01 [0.74-1.37]      | 1.00       | 0.2 [(-9.6)-9.9]            |
| Bloody stool                        | 27,624 | 14                  | 4.8 [2.2-7.5]                                 | 18                  | 7.8 [3.9-11.8]                                | 0.62 [0.31-1.23]      | 0.43       | -3.0 [(-7.7)-1.7]           |
| Cardiac arrhythmias                 | 27,307 | 10                  | 3.5 [1.2-5.8]                                 | 23                  | 7.7 [4.5-11.0]                                | 0.46 [0.21-1.01]      | 0.21       | -4.2 [(-8.2)-(-0.2)]        |
| Celiac disease                      | 27,467 | 23                  | 8.5 [4.9-12.1]                                | 28                  | 9.7 [5.9-13.5]                                | 0.87 [0.52-1.48]      | 0.86       | -1.2 [(-6.5)-4.0]           |
| Chest pain                          | 26,835 | 232                 | 98.2 [85.1-111.2]                             | 249                 | 91.3 [79.5-103.0]                             | 1.08 [0.9-1.28]       | 0.70       | 6.9 [(-10.7)-24.5]          |
| Concentration and memory impairment | 27,655 | 10                  | 4.6 [1.7-7.5]                                 | 12                  | 4.0 [1.7-6.3]                                 | 1.15 [0.51-2.61]      | 0.92       | 0.6 [(-3.2)-4.3]            |
| Conjunctivitis                      | 25,967 | 270                 | 112.4 [98.4-126.5]                            | 273                 | 106.4 [93.1-119.8]                            | 1.06 [0.9-1.24]       | 0.79       | 6.0 [(-13.4)-25.4]          |
| Convulsions                         | 25,790 | 5                   | 2.1 [0.2-3.9]                                 | 12                  | 5.0 [2.0-8.0]                                 | 0.41 [0.15-1.12]      | 0.27       | -3.0 [(-6.5)-0.6]           |
| Cough                               | 25,005 | 339                 | 140.9 [125.2-156.7]                           | 350                 | 145.6 [129.4-161.7]                           | 0.97 [0.84-1.12]      | 0.89       | -4.6 [(-27.2)-17.9]         |
| Depression                          | 27,260 | 19                  | 9.2 [5.0-13.4]                                | 46                  | 15.6 [11.0-20.3]                              | 0.59 [0.36-0.97]      | 0.18       | -6.4 [(-12.7)-(-0.1)]       |
| Diabetes Mellitus                   | 27,554 | 5                   | 2.2 [0.2-4.2]                                 | 8                   | 3.7 [0.8-6.6]                                 | 0.6 [0.23-1.54]       | 0.59       | -1.5 [(-5.0)-2.0]           |
| Diseases of the nervous system      | 27,181 | 20                  | 8.6 [4.7-12.5]                                | 13                  | 4.8 [2.1-7.4]                                 | 1.81 [0.9-3.62]       | 0.30       | 3.8 [(-0.8)-8.5]            |
| Dizziness                           | 27,145 | 94                  | 39.3 [31.1-47.5]                              | 110                 | 41.2 [33.1-49.2]                              | 0.95 [0.73-1.25]      | 0.92       | -1.9 [(-13.4)-9.7]          |
| Dyspnea                             | 27,143 | 181                 | 77.8 [66.0-89.5]                              | 125                 | 45.7 [37.3-54.1]                              | 1.7 [1.36-2.12]       | <0.001     | 32.4 [17.9-46.8]            |
| Epilepsy                            | 26,876 | 7                   | 2.7 [0.6-4.7]                                 | 10                  | 3.3 [1.2-5.4]                                 | 0.8 [0.3-2.17]        | 0.89       | -0.7 [(-3.6)-2.3]           |
| Fatty Liver                         | 27,400 | 14                  | 5.6 [2.5-8.6]                                 | 18                  | 6.3 [3.3-9.2]                                 | 0.89 [0.44-1.8]       | 0.92       | -0.7 [(-4.9)-3.5]           |
| Hair loss                           | 27,290 | 96                  | 37.6 [29.7-45.4]                              | 101                 | 36.7 [29.2-44.2]                              | 1.02 [0.77-1.35]      | 0.98       | 0.9 [(-10.0)-11.8]          |
| Headache                            | 25,224 | 352                 | 155.3 [138.4-172.2]                           | 450                 | 183.3 [165.3-201.2]                           | 0.85 [0.74-0.97]      | 0.10       | -28.0 [(-52.6)-(-3.3)]      |
| Herpes Simplex                      | 22,969 | 27                  | 12.7 [7.7-17.8]                               | 23                  | 10.5 [6.0-14.9]                               | 1.22 [0.7-2.1]        | 0.77       | 2.3 [(-4.4)-9.0]            |

|                              |        |     |                     |     |                    |                  |        |                     |
|------------------------------|--------|-----|---------------------|-----|--------------------|------------------|--------|---------------------|
| Herpes Zoster                | 27,606 | 22  | 8.8 [5.0-12.6]      | 15  | 5.5 [2.6-8.4]      | 1.59 [0.84-3.0]  | 0.40   | 3.3 [(-1.5)-8.0]    |
| Hospitalization              | 26,290 | 236 | 99.7 [86.5-113.0]   | 273 | 108.3 [94.8-121.8] | 0.91 [0.76-1.09] | 0.93   | -7.2 [(-27.1)-12.8] |
| Hyperreactive Airway Disease | 13,194 | 13  | 11.3 [4.8-17.7]     | 17  | 11.6 [5.9-17.2]    | 0.97 [0.49-1.94] | 1.00   | -0.3 [(-8.9)-8.3]   |
| Hypertension                 | 27,333 | 18  | 7.4 [3.9-11.0]      | 7   | 2.7 [0.6-4.7]      | 2.76 [1.18-6.46] | 0.12   | 4.7 [0.6-8.8]       |
| Loss of appetite             | 27,233 | 84  | 35.5 [27.7-43.4]    | 101 | 37.2 [29.5-44.9]   | 0.96 [0.73-1.25] | 0.92   | -1.7 [(-12.7)-9.3]  |
| Lymphadenopathy              | 27,323 | 68  | 29.3 [22.1-36.6]    | 105 | 38.7 [30.9-46.6]   | 0.76 [0.57-1.01] | 0.22   | -9.4 [(-20.1)-1.3]  |
| Menstruation abnormalities   | 26,037 | 118 | 54.2 [44.2-64.1]    | 149 | 55.9 [46.4-65.4]   | 0.97 [0.78-1.2]  | 0.93   | -1.7 [(-15.5)-12.1] |
| Muscle atrophy               | 27,687 | 10  | 4.4 [1.6-7.1]       | 7   | 2.8 [0.4-5.1]      | 1.56 [0.62-3.92] | 0.64   | 1.6 [(-2.1)-5.2]    |
| Myalgia                      | 27,237 | 112 | 45.7 [36.9-54.5]    | 126 | 46.8 [38.2-55.3]   | 0.98 [0.76-1.25] | 0.97   | -1.1 [(-13.3)-11.2] |
| Nausea or vomiting           | 26,885 | 140 | 58.6 [48.6-68.7]    | 180 | 68.2 [57.7-78.6]   | 0.86 [0.7-1.06]  | 0.42   | -9.5 [(-24.0)-5.0]  |
| Palpitations                 | 27,452 | 70  | 27.8 [21.0-34.6]    | 65  | 23.0 [17.3-28.8]   | 1.21 [0.86-1.69] | 0.57   | 4.8 [(-4.1)-13.6]   |
| Paresthesia                  | 27,629 | 23  | 10.3 [5.9-14.6]     | 26  | 9.1 [5.5-12.6]     | 1.13 [0.65-1.96] | 0.89   | 1.2 [(-4.4)-6.8]    |
| Psychosis                    | 27,454 | 11  | 3.9 [1.5-6.2]       | 9   | 3.0 [1.0-4.9]      | 1.3 [0.51-3.29]  | 0.84   | 0.9 [(-2.2)-4.0]    |
| Rhinorrhea                   | 27,669 | 9   | 2.9 [0.9-4.9]       | 9   | 3.6 [1.0-6.1]      | 0.81 [0.32-2.05] | 0.89   | -0.7 [(-3.9)-2.5]   |
| Skin rash                    | 26,755 | 141 | 61.4 [50.9-72.0]    | 198 | 73.2 [62.4-84.1]   | 0.84 [0.69-1.03] | 0.28   | -11.8 [(-26.9)-3.3] |
| Sore throat                  | 26,939 | 132 | 48.6 [39.9-57.3]    | 143 | 59.8 [49.3-70.3]   | 0.81 [0.65-1.02] | 0.26   | -11.2 [(-24.8)-2.4] |
| Streptococcal tonsillitis    | 26,152 | 253 | 92.5 [80.4-104.7]   | 128 | 55.1 [44.8-65.3]   | 1.68 [1.4-2.02]  | <0.001 | 37.4 [21.5-53.3]    |
| Tinnitus                     | 27,530 | 44  | 18.3 [12.7-23.9]    | 48  | 17.3 [12.2-22.3]   | 1.06 [0.71-1.58] | 0.93   | 1.0 [(-6.5)-8.6]    |
| Tremor                       | 27,636 | 20  | 7.8 [4.2-11.3]      | 15  | 5.2 [2.5-7.9]      | 1.49 [0.78-2.85] | 0.51   | 2.6 [(-1.9)-7.0]    |
| Visual disturbances          | 27,432 | 56  | 20.7 [15.1-26.4]    | 43  | 15.4 [10.6-20.2]   | 1.35 [0.91-1.99] | 0.37   | 5.4 [(-2.1)-12.8]   |
| Voice disorder               | 27,537 | 51  | 17.2 [12.2-22.2]    | 28  | 12.2 [7.3-17.2]    | 1.41 [0.91-2.19] | 0.36   | 5.0 [(-2.1)-12.0]   |
| Weakness                     | 26,562 | 363 | 138.9 [123.8-153.9] | 200 | 83.6 [71.2-96.0]   | 1.66 [1.41-1.96] | <0.001 | 55.2 [35.7-74.7]    |
| Weight loss                  | 27,464 | 48  | 20.2 [14.3-26.1]    | 51  | 18.4 [13.1-23.6]   | 1.1 [0.76-1.6]   | 0.86   | 1.8 [(-6.1)-9.8]    |

\* Outcomes with 10 events or more.

**Table S4d** – Association of health outcomes\* with SARS-CoV-2 infection in unvaccinated individuals during Wild-Type and Alpha variants, 30-180 days post PCR test, age 19-40 years.

| Outcome                             | N      | SARS-CoV-2 Positive |                                      | SARS-CoV-2 Negative |                                      | Hazard Ratio<br>95%CI | Q<br>value | Risk Diff/10,000<br>persons |
|-------------------------------------|--------|---------------------|--------------------------------------|---------------------|--------------------------------------|-----------------------|------------|-----------------------------|
|                                     |        | No. events          | Absolute risk/10,000 persons [95%CI] | No. events          | Absolute risk/10,000 persons [95%CI] |                       |            |                             |
| Abdominal pain                      | 45,886 | 1,734               | 421.1 [400.7-441.4]                  | 1,803               | 412.1 [392.2-432.0]                  | 1.03 [0.96-1.1]       | 0.71       | 11.7 [(-16.8)-40.1]         |
| Anosmia and Dysgeusia               | 56,684 | 164                 | 33.3 [28.2-38.5]                     | 32                  | 6.4 [4.0-8.7]                        | 5.23 [3.48-7.87]      | <0.001     | 26.9 [21.3-32.6]            |
| Anxiety                             | 44,297 | 245                 | 62.1 [54.1-70.1]                     | 249                 | 57.1 [49.6-64.6]                     | 1.09 [0.9-1.31]       | 0.68       | 5.0 [(-6.0)-15.9]           |
| Appendicitis                        | 51,802 | 36                  | 7.9 [5.2-10.5]                       | 39                  | 7.4 [4.9-9.9]                        | 1.06 [0.65-1.72]      | 0.94       | 0.4 [(-3.2)-4.1]            |
| Arthralgia                          | 55,041 | 350                 | 67.5 [60.2-74.8]                     | 408                 | 73.3 [65.8-80.7]                     | 0.92 [0.79-1.07]      | 0.58       | -5.8 [(-16.2)-4.7]          |
| Bloody stool                        | 56,681 | 48                  | 9.2 [6.5-11.9]                       | 54                  | 9.3 [6.7-11.8]                       | 0.99 [0.66-1.49]      | 1.00       | -0.1 [(-3.8)-3.7]           |
| Cardiac arrhythmias                 | 54,940 | 38                  | 7.4 [5.0-9.8]                        | 38                  | 6.2 [4.2-8.3]                        | 1.19 [0.75-1.9]       | 0.74       | 1.2 [(-2.0)-4.4]            |
| Celiac disease                      | 56,702 | 25                  | 4.5 [2.6-6.3]                        | 40                  | 7.9 [5.4-10.4]                       | 0.57 [0.33-0.96]      | 0.16       | -3.4 [(-6.5)-(-0.3)]        |
| Chest pain                          | 53,079 | 1,060               | 218.1 [204.5-231.6]                  | 730                 | 141.4 [130.5-152.2]                  | 1.54 [1.4-1.7]        | <0.001     | 76.7 [59.4-94.1]            |
| Concentration and memory impairment | 56,636 | 141                 | 28.6 [23.8-33.4]                     | 72                  | 12.8 [9.7-16.0]                      | 2.23 [1.65-3.01]      | <0.001     | 15.7 [10.0-21.5]            |
| Conjunctivitis                      | 53,194 | 599                 | 116.9 [107.1-126.6]                  | 625                 | 122.0 [111.8-132.2]                  | 0.96 [0.85-1.08]      | 0.76       | -5.1 [(-19.2)-9.0]          |
| Convulsions                         | 54,336 | 13                  | 2.9 [1.3-4.4]                        | 9                   | 1.7 [0.6-2.8]                        | 1.87 [0.78-4.47]      | 0.41       | 1.4 [(-0.5)-3.3]            |
| Cough                               | 50,501 | 892                 | 187.2 [174.4-200.0]                  | 918                 | 192.4 [179.2-205.6]                  | 0.97 [0.88-1.07]      | 0.84       | -5.2 [(-23.7)-13.2]         |
| Depression                          | 50,761 | 104                 | 23.2 [18.7-27.7]                     | 119                 | 22.6 [18.3-26.9]                     | 1.03 [0.78-1.35]      | 0.97       | 0.6 [(-5.7)-6.8]            |
| Diabetes Mellitus                   | 56,122 | 27                  | 4.1 [2.5-5.7]                        | 11                  | 2.4 [0.9-4.0]                        | 1.69 [0.8-3.59]       | 0.43       | 1.7 [(-0.6)-3.9]            |
| Diarrhea                            | 56,843 | 2                   | 0.4 [-0.2-0.9]                       | 10                  | 1.6 [0.6-2.6]                        | 0.24 [0.05-1.16]      | 0.26       | -1.2 [(-2.3)-(-0.0)]        |
| Diseases of the nervous system      | 51,083 | 132                 | 27.9 [23.0-32.8]                     | 156                 | 29.7 [24.8-34.6]                     | 0.94 [0.74-1.2]       | 0.86       | -1.8 [(-8.7)-5.2]           |
| Diseases of the pleura              | 56,539 | 5                   | 0.8 [0.0-1.5]                        | 7                   | 1.2 [0.3-2.1]                        | 0.64 [0.2-2.12]       | 0.75       | -0.4 [(-1.6)-0.7]           |
| Dizziness                           | 54,476 | 532                 | 105.1 [95.9-114.3]                   | 445                 | 84.0 [75.9-92.2]                     | 1.25 [1.1-1.43]       | 0.01       | 21.0 [8.7-33.3]             |
| Dyspnea                             | 55,319 | 732                 | 149.0 [137.9-160.0]                  | 318                 | 60.0 [53.1-66.9]                     | 2.51 [2.19-2.89]      | <0.001     | 90.7 [77.7-103.7]           |
| Epilepsy                            | 55,005 | 13                  | 2.8 [1.3-4.4]                        | 10                  | 1.7 [0.6-2.7]                        | 1.7 [0.73-3.97]       | 0.50       | 1.2 [(-0.7)-3.1]            |
| Fatty Liver                         | 53,524 | 137                 | 27.4 [22.6-32.1]                     | 115                 | 21.9 [17.6-26.1]                     | 1.25 [0.96-1.62]      | 0.29       | 5.5 [(-0.8)-11.8]           |
| Hair loss                           | 54,940 | 503                 | 102.1 [93.0-111.1]                   | 380                 | 67.1 [59.9-74.2]                     | 1.52 [1.32-1.75]      | <0.001     | 35.0 [23.5-46.5]            |
| Headache                            | 49,232 | 1,242               | 277.8 [261.9-293.7]                  | 1,257               | 264.2 [248.8-279.5]                  | 1.05 [0.97-1.14]      | 0.52       | 13.6 [(-8.5)-35.7]          |
| Herpes Simplex                      | 42,610 | 80                  | 21.3 [16.5-26.1]                     | 78                  | 17.0 [13.0-20.9]                     | 1.26 [0.91-1.74]      | 0.43       | 4.3 [(-1.9)-10.5]           |

|                              |        |     |                     |     |                     |                   |        |                       |
|------------------------------|--------|-----|---------------------|-----|---------------------|-------------------|--------|-----------------------|
| Herpes Zoster                | 56,499 | 70  | 15.1 [11.5-18.7]    | 94  | 16.6 [13.0-20.2]    | 0.91 [0.66-1.26]  | 0.82   | -1.5 [(-6.6)-3.5]     |
| Hospitalization              | 52,081 | 887 | 175.9 [163.8-188.0] | 799 | 168.2 [155.8-180.5] | 1.03 [0.92-1.15]  | 0.51   | 9.9 [(-10.2)-30.0]    |
| Hyperhidrosis                | 56,814 | 20  | 4.2 [2.4-6.1]       | 30  | 4.5 [2.8-6.3]       | 0.93 [0.52-1.67]  | 0.94   | -0.3 [(-2.8)-2.2]     |
| Hyperreactive Airway Disease | 30,155 | 55  | 19.7 [14.3-25.1]    | 39  | 14.0 [9.2-18.8]     | 1.41 [0.9-2.19]   | 0.37   | 5.7 [(-1.5)-12.9]     |
| Hypertension                 | 53,661 | 52  | 10.3 [7.4-13.1]     | 53  | 10.4 [7.5-13.3]     | 0.98 [0.66-1.47]  | 0.99   | -0.2 [(-4.3)-3.9]     |
| Insomnia                     | 56,874 | 9   | 2.2 [0.8-3.6]       | 5   | 0.8 [0.1-1.5]       | 2.8 [0.92-8.52]   | 0.25   | 1.4 [(-0.2)-3.0]      |
| Invasive pneumococcal        | 55,239 | 8   | 1.6 [0.4-2.8]       | 8   | 1.4 [0.4-2.4]       | 1.15 [0.41-3.19]  | 0.93   | 0.2 [(-1.3)-1.7]      |
| Ischemic heart disease       | 56,473 | 18  | 3.7 [1.9-5.4]       | 13  | 2.0 [0.9-3.2]       | 1.81 [0.87-3.73]  | 0.33   | 1.6 [(-0.4)-3.7]      |
| Ischemic stroke and TIA      | 56,693 | 2   | 0.4 [-0.2-1.0]      | 10  | 1.6 [0.6-2.7]       | 0.26 [0.06-1.24]  | 0.29   | -1.2 [(-2.4)-0.0]     |
| Loss of appetite             | 55,972 | 177 | 36.0 [30.5-41.4]    | 218 | 38.9 [33.4-44.4]    | 0.92 [0.75-1.14]  | 0.75   | -2.9 [(-10.7)-4.8]    |
| Lymphadenopathy              | 56,021 | 176 | 36.1 [30.7-41.6]    | 262 | 45.3 [39.5-51.1]    | 0.8 [0.65-0.97]   | 0.15   | -9.1 [(-17.1)-(-1.2)] |
| Menstruation abnormalities   | 39,371 | 202 | 52.5 [44.9-60.1]    | 194 | 54.2 [46.2-62.2]    | 0.97 [0.79-1.2]   | 0.93   | -1.6 [(-12.7)-9.4]    |
| Muscle atrophy               | 56,841 | 21  | 4.1 [2.2-5.9]       | 19  | 3.0 [1.6-4.4]       | 1.35 [0.71-2.57]  | 0.65   | 1.1 [(-1.2)-3.3]      |
| Myalgia                      | 54,666 | 473 | 94.6 [85.8-103.3]   | 432 | 79.9 [72.0-87.8]    | 1.18 [1.03-1.36]  | 0.10   | 14.6 [2.8-26.5]       |
| Myocarditis                  | 56,901 | 6   | 1.1 [0.2-2.0]       | 4   | 0.6 [-0.0-1.1]      | 2.02 [0.55-7.37]  | 0.59   | 0.6 [(-0.5)-1.7]      |
| Nausea or vomiting           | 54,709 | 408 | 80.4 [72.4-88.5]    | 425 | 79.1 [71.2-87.0]    | 1.02 [0.88-1.17]  | 0.94   | 1.4 [(-9.9)-12.6]     |
| Palpitations                 | 55,648 | 381 | 75.0 [67.3-82.7]    | 290 | 53.3 [46.8-59.8]    | 1.41 [1.2-1.65]   | <0.001 | 21.7 [11.6-31.7]      |
| Paresthesia                  | 55,724 | 278 | 55.7 [49.0-62.4]    | 299 | 53.1 [46.7-59.5]    | 1.05 [0.88-1.25]  | 0.84   | 2.6 [(-6.7)-11.8]     |
| Pericarditis                 | 56,563 | 17  | 3.7 [2.0-5.4]       | 3   | 0.6 [-0.1-1.4]      | 5.89 [1.56-22.22] | 0.07   | 3.1 [1.2-4.9]         |
| Psychosis                    | 55,553 | 23  | 4.5 [2.6-6.4]       | 29  | 4.9 [3.1-6.8]       | 0.91 [0.52-1.61]  | 0.92   | -0.4 [(-3.1)-2.2]     |
| Pulmonary disease            | 55,861 | 3   | 0.7 [-0.1-1.5]      | 7   | 1.7 [0.3-3.0]       | 0.42 [0.1-1.79]   | 0.53   | -1.0 [(-2.5)-0.6]     |
| Respiratory disorders        | 56,390 | 15  | 2.5 [1.2-3.9]       | 7   | 1.2 [0.3-2.0]       | 2.19 [0.88-5.46]  | 0.29   | 1.4 [(-0.2)-3.0]      |
| Rhinorrhea                   | 56,816 | 18  | 3.5 [1.9-5.2]       | 27  | 4.5 [2.7-6.3]       | 0.78 [0.42-1.45]  | 0.72   | -1.0 [(-3.5)-1.5]     |
| Skin rash                    | 55,452 | 278 | 57.0 [50.1-63.9]    | 325 | 57.1 [50.6-63.6]    | 1.0 [0.84-1.18]   | 1.00   | -0.1 [(-9.6)-9.4]     |
| Sore throat                  | 55,179 | 330 | 61.7 [54.8-68.6]    | 333 | 62.1 [55.1-69.1]    | 0.99 [0.85-1.17]  | 0.99   | -0.4 [(-10.2)-9.4]    |
| Streptococcal tonsillitis    | 54,743 | 417 | 71.9 [64.5-79.3]    | 269 | 60.9 [53.1-68.7]    | 1.18 [1.0-1.4]    | 0.21   | 11.0 [0.3-21.8]       |
| Tinnitus                     | 55,984 | 182 | 37.3 [31.7-42.8]    | 214 | 38.5 [33.1-43.9]    | 0.97 [0.79-1.19]  | 0.92   | -1.2 [(-9.0)-6.5]     |
| Tremor                       | 56,711 | 48  | 9.4 [6.7-12.2]      | 50  | 9.3 [6.5-12.0]      | 1.02 [0.67-1.55]  | 0.99   | 0.2 [(-3.7)-4.0]      |
| Venous thromboembolism       | 56,610 | 55  | 10.0 [7.2-12.8]     | 52  | 10.7 [7.6-13.9]     | 0.93 [0.62-1.4]   | 0.92   | -0.7 [(-4.9)-3.4]     |
| Visual disturbances          | 56,244 | 135 | 25.3 [20.8-         | 132 | 25.3 [20.7-         | 1.0 [0.77-1.29]   | 1.00   | -0.0 [(-6.4)-6.3]     |

|                |        |       |                     |     |                     |                  |        |                     |
|----------------|--------|-------|---------------------|-----|---------------------|------------------|--------|---------------------|
|                |        |       | 29.7]               |     | 29.9]               |                  |        |                     |
| Voice disorder | 56,280 | 137   | 24.7 [20.3-29.0]    | 117 | 22.0 [17.8-26.2]    | 1.12 [0.86-1.46] | 0.68   | 2.7 [(-3.4)-8.7]    |
| Weakness       | 51,484 | 1,533 | 309.7 [293.5-326.0] | 880 | 188.0 [174.9-201.2] | 1.65 [1.51-1.8]  | <0.001 | 121.7 [100.8-142.5] |
| Weight loss    | 56,325 | 117   | 23.4 [19.1-27.7]    | 135 | 23.8 [19.5-28.0]    | 0.98 [0.76-1.28] | 0.98   | -0.4 [(-6.5)-5.7]   |

\* Outcomes with 10 events or more.

**Table S4e** – Association of health outcomes\* with SARS-CoV-2 infection in unvaccinated individuals during Wild-Type and Alpha variants, 30-180 days post PCR test, age 41-60 years .

| Outcome                             | N      | SARS-CoV-2 Positive |                                      | SARS-CoV-2 Negative |                                      | Hazard Ratio<br>95%CI | Q<br>value | Risk Diff/10,000<br>persons |
|-------------------------------------|--------|---------------------|--------------------------------------|---------------------|--------------------------------------|-----------------------|------------|-----------------------------|
|                                     |        | No. events          | Absolute risk/10,000 persons [95%CI] | No. events          | Absolute risk/10,000 persons [95%CI] |                       |            |                             |
| Abdominal pain                      | 27,162 | 1,048               | 408.7 [383.2-434.1]                  | 1,048               | 403.4 [377.8-428.9]                  | 1.02 [0.94-1.1]       | 0.87       | 7.8 [(-28.2)-43.9]          |
| Anosmia and Dysgeusia               | 33,681 | 121                 | 42.8 [35.3-50.3]                     | 38                  | 10.6 [7.1-14.0]                      | 4.05 [3.11-5.28]      | <0.001     | 32.2 [23.9-40.5]            |
| Anxiety                             | 20,136 | 115                 | 61.0 [49.6-72.5]                     | 96                  | 48.8 [38.5-59.2]                     | 1.25 [0.97-1.61]      | 0.28       | 12.2 [(-3.2)-27.6]          |
| Appendicitis                        | 31,663 | 14                  | 4.6 [2.1-7.1]                        | 10                  | 2.9 [1.1-4.8]                        | 1.56 [0.7-3.48]       | 0.58       | 1.6 [(-1.5)-4.8]            |
| Arthralgia                          | 31,283 | 502                 | 164.9 [150.1-179.7]                  | 414                 | 143.5 [129.1-158.0]                  | 1.15 [1.02-1.29]      | 0.11       | 21.4 [0.7-42.1]             |
| Bloody stool                        | 33,586 | 55                  | 16.1 [11.7-20.4]                     | 49                  | 14.8 [10.4-19.1]                     | 1.09 [0.76-1.55]      | 0.88       | 1.3 [(-4.9)-7.5]            |
| Cardiac arrhythmias                 | 30,711 | 65                  | 21.6 [16.3-27.0]                     | 36                  | 11.3 [7.5-15.1]                      | 1.92 [1.27-2.91]      | 0.02       | 10.4 [3.8-17.0]             |
| Celiac disease                      | 33,729 | 18                  | 5.9 [3.1-8.7]                        | 9                   | 2.2 [0.7-3.7]                        | 2.67 [1.17-6.12]      | 0.12       | 3.7 [0.6-6.8]               |
| Chest pain                          | 29,298 | 1,047               | 384.6 [360.8-408.3]                  | 798                 | 282.5 [261.9-303.0]                  | 1.36 [1.26-1.47]      | <0.001     | 102.1 [70.7-133.6]          |
| Chronic kidney disease              | 33,279 | 7                   | 4.7 [2.4-6.9]                        | 9                   | 5.9 [3.0-8.8]                        | 0.58 [0.23-1.43]      | 0.53       | -1.4 [(-4.1)-1.3]           |
| Concentration and memory impairment | 33,480 | 164                 | 53.3 [45.1-61.6]                     | 91                  | 28.1 [22.0-34.3]                     | 1.9 [1.54-2.33]       | <0.001     | 25.2 [14.9-35.5]            |
| Congestive heart failure            | 33,488 | 11                  | 3.2 [1.2-5.1]                        | 22                  | 6.8 [3.8-9.8]                        | 0.46 [0.22-0.99]      | 0.20       | -3.6 [(-7.2)-(-0.1)]        |
| Conjunctivitis                      | 31,335 | 324                 | 108.2 [96.0-120.5]                   | 331                 | 108.9 [96.4-121.4]                   | 0.99 [0.86-1.15]      | 0.99       | -0.7 [(-18.2)-16.8]         |
| Convulsions                         | 33,319 | 5                   | 1.5 [0.1-2.9]                        | 8                   | 3.0 [0.8-5.3]                        | 0.51 [0.18-1.44]      | 0.49       | -1.5 [(-4.1)-1.2]           |
| Cough                               | 29,184 | 836                 | 295.6 [274.8-316.4]                  | 606                 | 223.2 [204.3-242.1]                  | 1.32 [1.21-1.45]      | <0.001     | 72.4 [44.3-100.5]           |
| Depression                          | 25,107 | 64                  | 28.4 [21.4-35.5]                     | 50                  | 21.9 [15.5-28.3]                     | 1.3 [0.93-1.82]       | 0.36       | 6.6 [(-3.0)-16.1]           |
| Diabetes Mellitus                   | 29,214 | 112                 | 37.7 [30.5-44.9]                     | 84                  | 32.9 [25.7-40.1]                     | 1.15 [0.85-1.54]      | 0.66       | 4.8 [(-5.4)-15.0]           |
| Diseases of the nervous system      | 21,555 | 137                 | 69.4 [57.7-81.2]                     | 114                 | 52.7 [42.6-62.8]                     | 1.32 [1.05-1.66]      | 0.12       | 16.7 [1.2-32.2]             |
| Dizziness                           | 31,201 | 496                 | 162.7 [148.0-177.3]                  | 430                 | 147.2 [132.7-161.7]                  | 1.11 [0.99-1.24]      | 0.29       | 15.5 [(-5.2)-36.1]          |
| Dyspnea                             | 32,289 | 805                 | 270.4 [251.3-289.5]                  | 326                 | 106.5 [94.5-118.6]                   | 2.57 [2.3-2.87]       | <0.001     | 166.5 [143.9-189.1]         |
| Epilepsy                            | 33,054 | 5                   | 1.7 [0.2-3.3]                        | 7                   | 2.4 [0.5-4.3]                        | 0.72 [0.25-2.08]      | 0.81       | -0.7 [(-3.1)-1.8]           |
| Fatty Liver                         | 26,434 | 186                 | 72.8 [62.2-83.4]                     | 139                 | 52.2 [43.2-61.3]                     | 1.39 [1.15-1.68]      | 0.01       | 20.5 [6.6-34.5]             |
| Guillain-Barre syndrome             | 33,829 | 5                   | 1.7 [0.2-3.2]                        | 5                   | 1.6 [0.2-3.0]                        | 1.08 [0.3-3.87]       | 0.98       | 0.1 [(-1.9)-2.2]            |
| Hair loss                           | 33,070 | 328                 | 110.4 [98.4-122.4]                   | 130                 | 39.4 [32.2-46.6]                     | 2.8 [2.3-3.41]        | <0.001     | 71.0 [57.0-85.0]            |

|                              |        |     |                     |     |                     |                   |        |                        |
|------------------------------|--------|-----|---------------------|-----|---------------------|-------------------|--------|------------------------|
| Headache                     | 28,796 | 808 | 300.0 [278.8-321.3] | 743 | 268.4 [248.2-288.7] | 1.12 [1.02-1.22]  | 0.11   | 31.6 [2.2-61.0]        |
| Herpes Simplex               | 24,916 | 32  | 14.0 [8.9-19.0]     | 29  | 11.8 [7.2-16.4]     | 1.18 [0.73-1.93]  | 0.78   | 2.2 [(-4.6)-9.0]       |
| Herpes Zoster                | 33,380 | 88  | 29.1 [22.9-35.3]    | 106 | 30.5 [24.4-36.7]    | 0.95 [0.77-1.18]  | 0.89   | -1.5 [(-10.2)-7.3]     |
| Hospitalization              | 29,869 | 590 | 202.0 [185.1-219.0] | 541 | 195.4 [178.0-212.9] | 1.01 [0.89-1.16]  | 0.49   | 8.4 [(-18.7)-35.6]     |
| Hyperhidrosis                | 33,784 | 15  | 5.3 [2.6-8.0]       | 18  | 5.1 [2.7-7.6]       | 1.03 [0.54-1.97]  | 0.99   | 0.2 [(-3.5)-3.8]       |
| Hyperreactive Airway Disease | 22,714 | 44  | 20.6 [14.2-26.9]    | 27  | 13.0 [7.8-18.3]     | 1.58 [1.07-2.33]  | 0.13   | 7.5 [(-0.7)-15.7]      |
| Hypertension                 | 21,662 | 149 | 69.8 [58.4-81.2]    | 123 | 61.0 [49.7-72.2]    | 1.14 [0.97-1.35]  | 0.33   | 8.8 [(-7.2)-24.8]      |
| Invasive pneumococcal        | 32,459 | 5   | 1.4 [0.1-2.6]       | 7   | 2.6 [0.5-4.7]       | 0.52 [0.17-1.56]  | 0.54   | -1.2 [(-3.7)-1.2]      |
| Ischemic heart disease       | 31,189 | 70  | 22.5 [17.1-27.9]    | 93  | 30.7 [24.1-37.4]    | 0.73 [0.52-1.02]  | 0.25   | -8.2 [(-16.8)-0.3]     |
| Ischemic stroke and TIA      | 32,633 | 19  | 5.8 [3.1-8.5]       | 18  | 5.8 [3.0-8.7]       | 0.99 [0.5-1.96]   | 1.00   | -0.0 [(-3.9)-3.9]      |
| Loss of appetite             | 33,182 | 151 | 48.0 [40.1-55.8]    | 167 | 50.9 [42.8-59.1]    | 0.94 [0.78-1.14]  | 0.81   | -3.0 [(-14.3)-8.3]     |
| Lymphadenopathy              | 33,341 | 99  | 31.7 [25.2-38.1]    | 139 | 41.7 [34.4-49.0]    | 0.76 [0.6-0.97]   | 0.14   | -10.0 [(-19.7)-(-0.3)] |
| Menstruation abnormalities   | 18,518 | 58  | 34.9 [25.6-44.2]    | 44  | 25.8 [17.8-33.8]    | 1.35 [0.94-1.95]  | 0.32   | 9.1 [(-3.2)-21.4]      |
| Muscle atrophy               | 33,776 | 30  | 8.6 [5.5-11.8]      | 19  | 6.0 [3.2-8.8]       | 1.43 [0.82-2.51]  | 0.49   | 2.6 [(-1.6)-6.9]       |
| Myalgia                      | 31,472 | 522 | 172.6 [157.4-187.7] | 387 | 130.8 [117.0-144.6] | 1.32 [1.17-1.48]  | <0.001 | 41.7 [21.3-62.2]       |
| Nausea or vomiting           | 33,020 | 163 | 50.6 [42.6-58.7]    | 167 | 51.3 [43.2-59.3]    | 0.99 [0.8-1.22]   | 0.99   | -0.6 [(-12.0)-10.8]    |
| Palpitations                 | 32,541 | 398 | 125.6 [112.9-138.2] | 248 | 76.5 [66.5-86.4]    | 1.64 [1.43-1.89]  | <0.001 | 49.1 [33.0-65.2]       |
| Paresthesia                  | 32,289 | 304 | 97.8 [86.6-109.0]   | 314 | 100.4 [88.7-112.1]  | 0.97 [0.85-1.12]  | 0.92   | -2.6 [(-18.8)-13.6]    |
| Pericarditis                 | 33,408 | 9   | 3.0 [1.0-5.0]       | 13  | 3.8 [1.7-6.0]       | 0.79 [0.33-1.9]   | 0.85   | -0.8 [(-3.8)-2.1]      |
| Psychosis                    | 32,766 | 9   | 2.8 [0.9-4.6]       | 12  | 3.5 [1.5-5.5]       | 0.8 [0.33-1.89]   | 0.86   | -0.7 [(-3.4)-2.0]      |
| Pulmonary disease            | 31,848 | 22  | 7.8 [4.5-11.1]      | 23  | 6.8 [3.9-9.8]       | 1.14 [0.62-2.08]  | 0.89   | 0.9 [(-3.5)-5.4]       |
| Respiratory disorders        | 33,429 | 40  | 12.1 [8.2-15.9]     | 9   | 2.6 [0.9-4.3]       | 4.72 [2.09-10.67] | 0.00   | 9.5 [5.3-13.7]         |
| Rhinorrhea                   | 33,795 | 8   | 2.4 [0.7-4.1]       | 13  | 3.6 [1.6-5.7]       | 0.67 [0.28-1.56]  | 0.66   | -1.2 [(-3.9)-1.5]      |
| Skin rash                    | 33,123 | 135 | 44.3 [36.6-52.1]    | 159 | 48.2 [40.3-56.0]    | 0.92 [0.74-1.14]  | 0.74   | -3.8 [(-14.8)-7.2]     |
| Sore throat                  | 33,091 | 85  | 26.3 [20.5-32.1]    | 117 | 37.4 [30.2-44.5]    | 0.7 [0.54-0.92]   | 0.08   | -11.1 [(-20.3)-(-1.9)] |
| Streptococcal tonsillitis    | 33,266 | 68  | 18.1 [13.6-22.7]    | 43  | 14.1 [9.4-18.9]     | 1.28 [0.88-1.86]  | 0.47   | 4.0 [(-2.6)-10.6]      |
| Tinnitus                     | 32,788 | 239 | 78.1 [68.0-88.2]    | 229 | 71.9 [62.1-81.6]    | 1.09 [0.94-1.26]  | 0.57   | 6.2 [(-7.8)-20.3]      |
| Tremor                       | 33,681 | 42  | 12.8 [8.8-16.8]     | 28  | 8.5 [5.2-11.8]      | 1.51 [0.99-2.29]  | 0.22   | 4.3 [(-0.9)-9.5]       |
| Venous thromboembolism       | 33,512 | 84  | 25.1 [19.5-30.7]    | 74  | 24.1 [18.2-29.9]    | 1.04 [0.87-1.25]  | 0.88   | 1.0 [(-7.1)-9.1]       |
| Visual disturbances          | 33,165 | 142 | 43.1 [35.8-         | 136 | 44.4 [36.6-         | 0.97 [0.8-1.17]   | 0.92   | -1.3 [(-12.1)-9.4]     |



|                |        |       |                     |     |                     |                  |        |                     |
|----------------|--------|-------|---------------------|-----|---------------------|------------------|--------|---------------------|
|                |        |       | 50.4]               |     | 52.3]               |                  |        |                     |
| Voice disorder | 33,337 | 103   | 29.2 [23.3-35.1]    | 89  | 29.1 [22.6-35.6]    | 1.0 [0.78-1.3]   | 1.00   | 0.1 [(-8.7)-8.9]    |
| Weakness       | 30,265 | 1,241 | 436.6 [411.7-461.5] | 582 | 202.8 [185.5-220.1] | 2.15 [1.98-2.34] | <0.001 | 233.7 [203.4-264.1] |
| Weight loss    | 33,445 | 92    | 29.3 [23.2-35.4]    | 101 | 31.2 [24.8-37.6]    | 0.94 [0.73-1.2]  | 0.86   | -1.9 [(-10.7)-6.9]  |

\* Outcomes with 10 events or more.

**Table S4f** – Association of health outcomes\* with SARS-CoV-2 infection in unvaccinated individuals during Wild-Type and Alpha variants, 30-180 days post PCR test, age > 60 years.

| Outcome                             | N      | SARS-CoV-2 Positive |                                      | SARS-CoV-2 Negative |                                      | Hazard Ratio<br>95%CI | Q<br>value | Risk Diff/10,000<br>persons |
|-------------------------------------|--------|---------------------|--------------------------------------|---------------------|--------------------------------------|-----------------------|------------|-----------------------------|
|                                     |        | No. events          | Absolute risk/10,000 persons [95%CI] | No. events          | Absolute risk/10,000 persons [95%CI] |                       |            |                             |
| Abdominal pain                      | 8,135  | 338                 | 429.6 [382.1-477.2]                  | 363                 | 467.1 [415.2-519.0]                  | 0.92 [0.8-1.07]       | 0.59       | -35.5 [(-106.3)-35.4]       |
| Anosmia and Dysgeusia               | 10,280 | 20                  | 24.2 [13.0-35.3]                     | 17                  | 14.9 [7.7-22.2]                      | 1.62 [0.9-2.93]       | 0.33       | 9.2 [(-4.0)-22.5]           |
| Anxiety                             | 5,123  | 35                  | 70.7 [46.1-95.3]                     | 23                  | 48.0 [27.7-68.3]                     | 1.47 [0.88-2.47]      | 0.38       | 22.7 [(-9.2)-54.6]          |
| Arthralgia                          | 9,257  | 172                 | 188.4 [159.0-217.9]                  | 130                 | 148.5 [121.4-175.7]                  | 1.27 [1.02-1.58]      | 0.17       | 39.9 [(-0.2)-80.0]          |
| Bloody stool                        | 10,144 | 35                  | 36.9 [24.3-49.6]                     | 36                  | 38.4 [25.1-51.7]                     | 0.96 [0.63-1.48]      | 0.97       | -1.4 [(-19.8)-16.9]         |
| Cardiac arrhythmias                 | 7,103  | 48                  | 70.7 [50.1-91.2]                     | 52                  | 79.9 [56.3-103.4]                    | 0.88 [0.6-1.3]        | 0.80       | -9.2 [(-40.5)-22.0]         |
| Celiac disease                      | 10,305 | 3                   | 2.8 [-0.5-6.2]                       | 7                   | 6.4 [1.6-11.2]                       | 0.44 [0.11-1.75]      | 0.54       | -3.6 [(-9.4)-2.3]           |
| Cerebral hemorrhage                 | 9,997  | 7                   | 7.0 [1.8-12.1]                       | 8                   | 7.1 [2.0-12.1]                       | 0.99 [0.15-6.33]      | 1.00       | -0.1 [(-7.4)-7.2]           |
| Chest pain                          | 8,563  | 340                 | 417.4 [371.2-463.6]                  | 263                 | 330.3 [286.7-373.8]                  | 1.26 [1.08-1.47]      | 0.03       | 87.1 [23.7-150.6]           |
| Chronic kidney disease              | 7,972  | 11                  | 52.1 [36.3-68.0]                     | 13                  | 48.7 [33.0-64.5]                     | 0.87 [0.42-1.77]      | 0.91       | -2.2 [(-14.7)-10.3]         |
| Concentration and memory impairment | 9,941  | 82                  | 87.9 [68.2-107.7]                    | 59                  | 63.2 [45.7-80.7]                     | 1.39 [1.03-1.87]      | 0.15       | 24.7 [(-1.6)-51.1]          |
| Congestive heart failure            | 9,284  | 24                  | 26.0 [15.3-36.8]                     | 36                  | 40.9 [26.7-55.1]                     | 0.64 [0.41-1.0]       | 0.20       | -14.9 [(-32.6)-2.9]         |
| Conjunctivitis                      | 9,334  | 140                 | 150.7 [124.5-176.8]                  | 141                 | 154.0 [126.9-181.2]                  | 0.98 [0.78-1.23]      | 0.97       | -3.3 [(-41.0)-34.4]         |
| Convulsions                         | 10,060 | 5                   | 4.1 [0.4-7.7]                        | 13                  | 11.4 [5.0-17.8]                      | 0.36 [0.12-1.09]      | 0.25       | -7.2 [(-14.6)-0.2]          |
| Cough                               | 8,295  | 331                 | 422.0 [374.3-469.7]                  | 261                 | 363.2 [314.9-411.5]                  | 1.16 [1.0-1.35]       | 0.21       | 58.8 [(-9.1)-126.7]         |
| Depression                          | 6,198  | 30                  | 48.0 [30.3-65.7]                     | 32                  | 53.1 [33.4-72.8]                     | 0.9 [0.55-1.48]       | 0.91       | -5.1 [(-31.5)-21.3]         |
| Diabetes Mellitus                   | 5,566  | 33                  | 61.6 [39.9-83.3]                     | 32                  | 62.6 [39.2-86.0]                     | 0.98 [0.83-1.17]      | 0.97       | -1.0 [(-32.9)-30.9]         |
| Diarrhea                            | 10,297 | 6                   | 5.9 [1.1-10.7]                       | 11                  | 10.6 [4.0-17.3]                      | 0.55 [0.24-1.27]      | 0.42       | -4.8 [(-13.0)-3.4]          |
| Diseases of the nervous system      | 4,540  | 33                  | 80.4 [51.8-109.0]                    | 34                  | 71.6 [46.8-96.4]                     | 1.12 [0.7-1.8]        | 0.87       | 8.8 [(-29.1)-46.6]          |
| Dizziness                           | 8,916  | 243                 | 281.0 [244.2-317.8]                  | 237                 | 283.3 [244.9-321.7]                  | 0.99 [0.84-1.18]      | 0.99       | -2.3 [(-55.4)-50.9]         |
| Dyspnea                             | 9,196  | 349                 | 405.8 [361.5-450.2]                  | 240                 | 270.7 [233.7-307.6]                  | 1.51 [1.3-1.75]       | <0.001     | 138.9 [81.0-196.9]          |
| Epilepsy                            | 9,989  | 4                   | 3.1 [-0.0-6.3]                       | 10                  | 9.2 [3.4-15.1]                       | 0.34 [0.1-1.22]       | 0.30       | -6.1 [(-12.7)-0.6]          |
| Fatty Liver                         | 7,135  | 40                  | 62.5 [42.2-82.8]                     | 48                  | 65.0 [46.1-84.0]                     | 0.96 [0.64-1.44]      | 0.97       | -2.5 [(-30.3)-25.2]         |
| Hair loss                           | 10,140 | 102                 | 115.7 [92.8-138.7]                   | 50                  | 46.2 [33.0-59.3]                     | 2.51 [1.78-3.53]      | <0.001     | 69.6 [43.1-96.1]            |
| Headache                            | 8,969  | 201                 | 235.8 [201.8-269.7]                  | 207                 | 247.4 [210.7-284.1]                  | 0.95 [0.79-1.15]      | 0.86       | -11.6 [(-61.6)-38.4]        |

|                              |        |     |                     |     |                     |                  |        |                        |
|------------------------------|--------|-----|---------------------|-----|---------------------|------------------|--------|------------------------|
| Herpes Simplex               | 7,701  | 15  | 21.5 [10.2-32.8]    | 10  | 12.3 [4.4-20.2]     | 1.74 [0.78-3.92] | 0.45   | 9.2 [(-4.6)-22.9]      |
| Herpes Zoster                | 10,078 | 49  | 52.7 [37.3-68.1]    | 55  | 57.4 [40.7-74.0]    | 0.92 [0.66-1.28] | 0.86   | -4.7 [(-27.4)-18.0]    |
| Hospitalization              | 7,166  | 349 | 511.0 [455.2-566.7] | 337 | 475.3 [421.0-529.6] | 1.06 [0.91-1.26] | 0.51   | 43.1 [(-40.7)-126.9]   |
| Hyperreactive Airway Disease | 6,195  | 11  | 17.6 [6.9-28.4]     | 10  | 19.0 [6.1-31.9]     | 0.93 [0.42-2.07] | 0.97   | -1.3 [(-18.1)-15.5]    |
| Hypertension                 | 1,624  | 33  | 200.4 [129.3-271.6] | 24  | 166.0 [93.5-238.6]  | 1.21 [0.74-1.97] | 0.75   | 34.4 [(-67.2)-136.0]   |
| Ischemic heart disease       | 6,556  | 36  | 59.9 [39.7-80.2]    | 52  | 78.4 [55.8-101.1]   | 0.76 [0.49-1.19] | 0.53   | -18.5 [(-48.9)-11.9]   |
| Ischemic stroke and TIA      | 8,597  | 22  | 28.7 [16.5-41.0]    | 44  | 48.3 [33.1-63.6]    | 0.59 [0.4-0.89]  | 0.09   | -19.6 [(-39.2)-(-0.1)] |
| Loss of appetite             | 9,883  | 87  | 93.1 [72.8-113.4]   | 118 | 115.6 [93.2-137.9]  | 0.81 [0.62-1.04] | 0.31   | -22.5 [(-52.7)-7.7]    |
| Lymphadenopathy              | 10,196 | 25  | 29.1 [17.1-41.1]    | 38  | 39.5 [25.6-53.3]    | 0.74 [0.46-1.18] | 0.49   | -10.4 [(-28.7)-7.9]    |
| Muscle atrophy               | 10,270 | 17  | 16.0 [8.2-23.8]     | 11  | 12.2 [4.1-20.4]     | 1.31 [0.63-2.73] | 0.77   | 3.8 [(-7.5)-15.1]      |
| Myalgia                      | 9,628  | 141 | 151.1 [125.2-177.1] | 96  | 111.1 [86.7-135.5]  | 1.36 [1.06-1.74] | 0.10   | 40.1 [4.4-75.7]        |
| Nausea or vomiting           | 9,919  | 68  | 73.9 [55.8-92.1]    | 85  | 91.6 [70.4-112.7]   | 0.81 [0.59-1.1]  | 0.44   | -17.6 [(-45.5)-10.2]   |
| Palpitations                 | 9,685  | 147 | 156.3 [129.8-182.8] | 109 | 113.2 [90.7-135.7]  | 1.38 [1.09-1.75] | 0.06   | 43.1 [8.4-77.9]        |
| Paresthesia                  | 9,836  | 102 | 106.7 [85.3-128.1]  | 123 | 122.7 [99.8-145.6]  | 0.87 [0.67-1.12] | 0.59   | -16.0 [(-47.4)-15.4]   |
| Parkinsonism                 | 9,877  | 11  | 12.2 [4.8-19.6]     | 9   | 12.2 [4.3-20.0]     | 1.0 [0.4-2.51]   | 1.00   | 0.0 [(-10.8)-10.8]     |
| Pericarditis                 | 10,060 | 7   | 8.2 [2.0-14.5]      | 8   | 7.8 [2.2-13.4]      | 1.05 [0.82-1.35] | 0.91   | 0.4 [(-8.0)-8.8]       |
| Psychosis                    | 9,664  | 14  | 16.4 [7.0-25.8]     | 24  | 24.6 [13.9-35.4]    | 0.67 [0.36-1.24] | 0.48   | -8.2 [(-22.5)-6.0]     |
| Pulmonary disease            | 8,217  | 19  | 27.3 [14.9-39.7]    | 18  | 23.3 [11.6-35.1]    | 1.17 [0.65-2.1]  | 0.85   | 4.0 [(-13.1)-21.1]     |
| Respiratory disorders        | 9,836  | 30  | 32.5 [20.6-44.4]    | 18  | 16.7 [8.3-25.0]     | 1.95 [0.99-3.84] | 0.21   | 15.8 [1.3-30.4]        |
| Respiratory failure          | 10,241 | 7   | 8.1 [2.2-14.0]      | 8   | 8.8 [2.5-15.1]      | 0.92 [0.2-4.11]  | 0.99   | -0.7 [(-9.4)-7.9]      |
| Skin rash                    | 10,045 | 52  | 56.0 [39.9-72.1]    | 55  | 52.9 [38.1-67.8]    | 1.06 [0.73-1.54] | 0.93   | 3.1 [(-18.8)-24.9]     |
| Sore throat                  | 10,186 | 28  | 28.3 [17.5-39.1]    | 23  | 28.4 [15.7-41.2]    | 1.0 [0.59-1.68]  | 1.00   | -0.1 [(-16.9)-16.6]    |
| Tinnitus                     | 9,892  | 109 | 117.7 [94.9-140.5]  | 89  | 92.8 [72.6-113.0]   | 1.27 [0.98-1.64] | 0.25   | 24.9 [(-5.6)-55.4]     |
| Tremor                       | 10,132 | 35  | 35.0 [22.8-47.2]    | 44  | 43.6 [30.0-57.3]    | 0.8 [0.55-1.18]  | 0.56   | -8.6 [(-26.9)-9.7]     |
| Venous thromboembolism       | 10,069 | 68  | 65.2 [48.8-81.5]    | 68  | 77.8 [57.8-97.8]    | 0.84 [0.67-1.04] | 0.33   | -12.7 [(-38.5)-13.2]   |
| Visual disturbances          | 9,876  | 66  | 73.6 [55.4-91.8]    | 72  | 66.2 [50.5-82.0]    | 1.11 [0.81-1.52] | 0.79   | 7.4 [(-16.7)-31.5]     |
| Voice disorder               | 10,151 | 40  | 42.7 [28.9-56.5]    | 36  | 39.9 [24.8-55.1]    | 1.07 [0.7-1.62]  | 0.93   | 2.7 [(-17.8)-23.2]     |
| Weakness                     | 8,887  | 423 | 497.2 [447.9-546.6] | 277 | 331.1 [288.6-373.6] | 1.5 [1.3-1.73]   | <0.001 | 166.2 [101.0-231.3]    |
| Weight loss                  | 9,965  | 69  | 71.9 [54.3-89.5]    | 103 | 98.2 [78.0-118.4]   | 0.73 [0.55-0.97] | 0.15   | -26.4 [(-53.2)-0.4]    |

\* Outcomes with 10 events or more.

**Table S4g**– Association of health outcomes\* with SARS-CoV-2 infection in unvaccinated individuals during Wild-Type and Alpha variants, 180-360 days post PCR test, age 0-4 years.

| Outcome                      | N      | SARS-CoV-2 Positive |                                               | SARS-CoV-2 Negative |                                               | Hazard Ratio<br>95%CI | Q<br>value | Risk Diff/10,000<br>persons |
|------------------------------|--------|---------------------|-----------------------------------------------|---------------------|-----------------------------------------------|-----------------------|------------|-----------------------------|
|                              |        | No.<br>event<br>s   | Absolute<br>risk/10,000<br>persons<br>[95%CI] | No.<br>even<br>ts   | Absolute<br>risk/10,000<br>persons<br>[95%CI] |                       |            |                             |
| Abdominal pain               | 10,566 | 274                 | 320.8 [281.1-360.4]                           | 329                 | 330.5 [291.8-369.3]                           | 0.97 [0.83-1.14]      | 0.92       | -9.1 [(-64.5)-46.3]         |
| Arthralgia                   | 11,161 | 6                   | 6.7 [1.2-12.2]                                | 9                   | 7.2 [2.5-11.9]                                | 0.93 [0.33-2.65]      | 0.98       | -0.5 [(-7.8)-6.8]           |
| Bloody stool                 | 11,081 | 14                  | 13.3 [5.9-20.6]                               | 9                   | 9.0 [2.4-15.5]                                | 1.48 [0.66-3.33]      | 0.65       | 4.3 [(-5.5)-14.1]           |
| Celiac disease               | 11,144 | 18                  | 17.9 [9.2-26.6]                               | 27                  | 26.5 [15.7-37.3]                              | 0.68 [0.4-1.14]       | 0.38       | -8.6 [(-22.4)-5.3]          |
| Chest pain                   | 11,166 | 10                  | 13.1 [4.9-21.3]                               | 8                   | 7.8 [1.6-14.0]                                | 1.68 [0.7-4.02]       | 0.54       | 5.3 [(-5.0)-15.6]           |
| Conjunctivitis               | 8,073  | 678                 | 1027.7 [946.6-1108.8]                         | 632                 | 917.9 [840.3-995.5]                           | 1.12 [1.03-1.22]      | 0.08       | 109.8 [(-2.4)-222.1]        |
| Convulsions                  | 10,832 | 30                  | 31.1 [21.5-44.9]                              | 10                  | 9.8 [5.1-18.8]                                | 2.82 [1.34-5.93]      | 0.05       | 21.3 [8.1-35.9]             |
| Cough                        | 7,227  | 859                 | 1572.1 [1462.3-1681.9]                        | 856                 | 1349.0 [1250.4-1447.6]                        | 1.13 [1.02-1.25]      | 0.10       | 180.7 [36.6-324.8]          |
| Dyspnea                      | 9,265  | 533                 | 662.7 [603.3-722.1]                           | 478                 | 606.9 [547.7-666.0]                           | 1.09 [0.99-1.2]       | 0.25       | 55.9 [(-28.0)-139.8]        |
| Epilepsy                     | 11,098 | 9                   | 8.4 [2.6-14.1]                                | 5                   | 3.6 [0.4-6.9]                                 | 2.29 [0.84-6.27]      | 0.32       | 4.7 [(-1.9)-11.3]           |
| Hair loss                    | 11,147 | 11                  | 11.8 [4.3-19.3]                               | 11                  | 15.0 [5.1-24.8]                               | 0.79 [0.37-1.69]      | 0.81       | -3.2 [(-15.5)-9.2]          |
| Headache                     | 11,094 | 45                  | 53.8 [37.5-70.1]                              | 57                  | 56.3 [40.0-72.6]                              | 0.96 [0.66-1.39]      | 0.94       | -2.5 [(-25.5)-20.5]         |
| Herpes Simplex               | 10,755 | 29                  | 29.5 [18.1-40.9]                              | 29                  | 32.5 [19.4-45.6]                              | 0.91 [0.55-1.49]      | 0.92       | -3.0 [(-20.4)-14.4]         |
| Hospitalization              | 9,878  | 192                 | 221.4 [188.5-254.4]                           | 154                 | 189.9 [156.7-223.0]                           | 1.06 [0.85-1.32]      | 0.47       | 32.1 [(-16.4)-80.5]         |
| Hyperreactive Airway Disease | 9,095  | 209                 | 272.1 [233.7-310.6]                           | 164                 | 198.8 [166.4-231.1]                           | 1.35 [1.08-1.67]      | 0.06       | 69.1 [19.6-118.6]           |
| Insomnia                     | 11,160 | 8                   | 9.8 [2.7-16.8]                                | 7                   | 6.9 [1.1-12.7]                                | 1.42 [0.59-3.4]       | 0.72       | 2.9 [(-6.3)-12.0]           |
| Invasive pneumococcal        | 10,958 | 27                  | 23.7 [14.1-33.4]                              | 32                  | 30.4 [19.1-41.6]                              | 0.78 [0.5-1.23]       | 0.59       | -6.7 [(-21.5)-8.2]          |
| Loss of appetite             | 10,793 | 49                  | 50.8 [35.6-65.9]                              | 51                  | 53.4 [37.2-69.6]                              | 0.95 [0.65-1.38]      | 0.93       | -2.7 [(-24.8)-19.5]         |
| Lymphadenopathy              | 10,951 | 74                  | 78.1 [59.5-96.7]                              | 63                  | 60.9 [44.5-77.3]                              | 1.28 [0.93-1.78]      | 0.37       | 17.2 [(-7.6)-42.0]          |
| Nausea or vomiting           | 9,944  | 304                 | 375.0 [331.3-418.7]                           | 273                 | 296.9 [258.8-335.1]                           | 1.26 [1.06-1.5]       | 0.07       | 78.0 [20.0-136.1]           |
| Rhinorrhea                   | 11,090 | 13                  | 13.4 [5.8-21.0]                               | 11                  | 11.2 [3.9-18.4]                               | 1.2 [0.56-2.56]       | 0.87       | 2.2 [(-8.2)-12.7]           |
| Skin rash                    | 9,103  | 284                 | 378.8 [333.0-424.6]                           | 268                 | 308.1 [268.4-347.8]                           | 1.23 [1.06-1.43]      | 0.06       | 70.7 [10.1-131.3]           |

|                           |        |     |                     |     |                     |                  |      |                      |
|---------------------------|--------|-----|---------------------|-----|---------------------|------------------|------|----------------------|
| Sore throat               | 11,100 | 33  | 36.6 [23.7-49.4]    | 34  | 33.2 [21.2-45.1]    | 1.1 [0.69-1.76]  | 0.90 | 3.4 [(-14.2)-21.0]   |
| Streptococcal tonsillitis | 10,461 | 330 | 397.7 [352.6-442.7] | 373 | 425.3 [378.3-472.4] | 0.93 [0.83-1.05] | 0.56 | -27.7 [(-92.8)-37.5] |
| Tinnitus                  | 11,111 | 11  | 10.1 [3.9-16.2]     | 11  | 11.7 [3.7-19.7]     | 0.86 [0.37-1.99] | 0.92 | -1.6 [(-11.7)-8.5]   |
| Visual disturbances       | 11,126 | 14  | 13.8 [6.3-21.3]     | 17  | 15.2 [7.5-22.9]     | 0.91 [0.44-1.86] | 0.93 | -1.4 [(-12.2)-9.4]   |
| Voice disorder            | 11,095 | 24  | 28.4 [16.6-40.3]    | 22  | 24.6 [13.3-35.9]    | 1.16 [0.68-1.96] | 0.85 | 3.8 [(-12.6)-20.3]   |
| Weakness                  | 11,049 | 29  | 27.2 [16.9-37.6]    | 30  | 32.3 [19.3-45.3]    | 0.84 [0.51-1.4]  | 0.79 | -5.1 [(-21.7)-11.5]  |
| Weight loss               | 11,146 | 4   | 4.5 [-0.1-9.0]      | 6   | 6.5 [0.7-12.4]      | 0.68 [0.21-2.23] | 0.80 | -2.1 [(-9.5)-5.4]    |

**Table S4h**– Association of health outcomes\* with SARS-CoV-2 infection in unvaccinated individuals during Wild-Type and Alpha variants, 180-360 days post PCR test, age 5-11 years.

| Outcome                             | N      | SARS-CoV-2 Positive |                                               | SARS-CoV-2 Negative |                                               | Hazard Ratio<br>95%CI | Q<br>value | Risk Diff/10,000<br>persons |
|-------------------------------------|--------|---------------------|-----------------------------------------------|---------------------|-----------------------------------------------|-----------------------|------------|-----------------------------|
|                                     |        | No.<br>event<br>s   | Absolute<br>risk/10,000<br>persons<br>[95%CI] | No.<br>even<br>ts   | Absolute<br>risk/10,000<br>persons<br>[95%CI] |                       |            |                             |
| Abdominal pain                      | 18,082 | 482                 | 339.3 [307.7-370.8]                           | 609                 | 382.5 [350.5-414.6]                           | 0.89 [0.79-1.0]       | 0.20       | -42.2 [(-87.1)-2.8]         |
| Anxiety                             | 20,257 | 52                  | 34.0 [24.4-43.5]                              | 69                  | 34.6 [26.2-43.0]                              | 0.98 [0.69-1.39]      | 0.99       | -0.7 [(-13.4)-12.1]         |
| Appendicitis                        | 20,626 | 10                  | 5.5 [2.0-9.1]                                 | 20                  | 10.7 [5.7-15.7]                               | 0.52 [0.24-1.11]      | 0.29       | -5.1 [(-11.2)-1.0]          |
| Arthralgia                          | 20,843 | 37                  | 21.2 [14.1-28.4]                              | 26                  | 13.7 [8.3-19.1]                               | 1.55 [0.94-2.58]      | 0.29       | 7.6 [(-1.4)-16.5]           |
| Bloody stool                        | 20,894 | 7                   | 4.0 [1.0-7.0]                                 | 10                  | 4.6 [1.7-7.5]                                 | 0.87 [0.33-2.32]      | 0.93       | -0.6 [(-4.8)-3.6]           |
| Celiac disease                      | 20,746 | 22                  | 12.4 [6.9-17.8]                               | 36                  | 18.4 [12.1-24.7]                              | 0.67 [0.43-1.06]      | 0.29       | -6.0 [(-14.4)-2.3]          |
| Chest pain                          | 20,643 | 89                  | 57.0 [44.8-69.2]                              | 88                  | 49.3 [38.6-60.1]                              | 1.15 [0.87-1.54]      | 0.62       | 7.6 [(-8.7)-24.0]           |
| Concentration and memory impairment | 20,922 | 11                  | 6.4 [2.5-10.2]                                | 8                   | 4.3 [1.2-7.3]                                 | 1.49 [0.6-3.69]       | 0.69       | 2.1 [(-2.8)-7.0]            |
| Conjunctivitis                      | 19,091 | 312                 | 194.8 [172.1-217.5]                           | 350                 | 214.5 [190.4-238.6]                           | 0.91 [0.79-1.05]      | 0.45       | -19.7 [(-52.8)-13.4]        |
| Convulsions                         | 19,705 | 10                  | 5.5 [1.9-9.2]                                 | 9                   | 5.3 [1.7-9.0]                                 | 1.03 [0.44-2.44]      | 1.00       | 0.2 [(-4.9)-5.4]            |
| Cough                               | 17,399 | 465                 | 346.3 [313.6-379.0]                           | 532                 | 349.4 [318.2-380.6]                           | 0.99 [0.88-1.11]      | 0.98       | -3.1 [(-48.3)-42.1]         |
| Diseases of the nervous system      | 20,810 | 13                  | 8.7 [3.7-13.6]                                | 8                   | 5.2 [1.2-9.2]                                 | 1.67 [0.74-3.77]      | 0.50       | 3.5 [(-2.9)-9.8]            |
| Dizziness                           | 20,838 | 27                  | 16.6 [10.0-23.2]                              | 30                  | 15.4 [9.8-21.0]                               | 1.08 [0.64-1.81]      | 0.93       | 1.2 [(-7.4)-9.9]            |
| Dyspnea                             | 20,198 | 122                 | 72.1 [58.8-85.5]                              | 131                 | 71.7 [58.8-84.5]                              | 1.0 [0.79-1.27]       | 1.00       | 1.0 [(-17.6)-19.6]          |
| Epilepsy                            | 20,595 | 9                   | 4.8 [1.6-8.1]                                 | 9                   | 4.6 [1.5-7.7]                                 | 1.05 [0.53-2.07]      | 0.98       | 0.2 [(-4.3)-4.8]            |
| Fatty Liver                         | 20,873 | 3                   | 1.8 [-0.3-3.9]                                | 7                   | 3.7 [0.9-6.5]                                 | 0.49 [0.13-1.86]      | 0.59       | -1.9 [(-5.4)-1.6]           |
| Hair loss                           | 20,840 | 17                  | 10.2 [5.1-15.3]                               | 18                  | 11.6 [5.7-17.4]                               | 0.88 [0.47-1.66]      | 0.91       | -1.4 [(-9.1)-6.4]           |
| Headache                            | 19,747 | 216                 | 135.9 [117.0-154.9]                           | 263                 | 151.7 [132.2-171.1]                           | 0.9 [0.75-1.07]       | 0.51       | -15.7 [(-42.8)-11.4]        |
| Herpes Simplex                      | 18,600 | 22                  | 14.2 [7.9-20.4]                               | 23                  | 15.6 [8.7-22.6]                               | 0.91 [0.52-1.59]      | 0.92       | -1.5 [(-10.8)-7.9]          |
| Herpes Zoster                       | 20,913 | 7                   | 3.7 [0.9-6.6]                                 | 10                  | 6.1 [2.0-10.1]                                | 0.62 [0.24-1.59]      | 0.62       | -2.3 [(-7.3)-2.7]           |
| Hospitalization                     | 20,065 | 122                 | 69.1 [56.2-82.0]                              | 130                 | 79.0 [64.3-93.6]                              | 0.81 [0.62-1.05]      | 0.51       | -8.9 [(-28.8)-11.0]         |
| Hyperreactive Airway Disease        | 12,872 | 27                  | 26.1 [15.8-36.4]                              | 29                  | 24.9 [15.3-34.6]                              | 1.05 [0.65-1.68]      | 0.97       | 1.1 [(-13.0)-15.3]          |
| Insomnia                            | 20,921 | 5                   | 2.8 [0.2-5.5]                                 | 5                   | 2.7 [0.3-5.2]                                 | 1.04 [0.32-3.38]      | 1.00       | 0.1 [(-3.5)-3.7]            |
| Loss of appetite                    | 20,704 |                     | 29.8 [20.9-                                   |                     | 23.5 [16.0-                                   | 1.27 [0.86-           | 0.53       | 6.3 [(-5.3)-17.9]           |

|                            |        |     |                     |     |                     |                  |      |                     |
|----------------------------|--------|-----|---------------------|-----|---------------------|------------------|------|---------------------|
|                            |        | 47  | 38.7]               | 44  | 31.0]               | 1.88]            |      |                     |
| Lymphadenopathy            | 20,633 | 41  | 26.8 [18.4-35.3]    | 69  | 37.4 [28.0-46.7]    | 0.72 [0.5-1.03]  | 0.26 | -10.5 [(-23.2)-2.1] |
| Menstruation abnormalities | 20,931 | 7   | 3.8 [0.8-6.8]       | 14  | 7.2 [3.4-11.0]      | 0.53 [0.21-1.35] | 0.45 | -3.4 [(-8.2)-1.5]   |
| Myalgia                    | 20,809 | 35  | 20.3 [13.3-27.4]    | 46  | 24.0 [16.9-31.1]    | 0.85 [0.55-1.31] | 0.75 | -3.7 [(-13.6)-6.3]  |
| Nausea or vomiting         | 20,078 | 194 | 121.8 [104.0-139.6] | 227 | 130.6 [112.7-148.4] | 0.93 [0.78-1.12] | 0.74 | -8.8 [(-34.0)-16.4] |
| Palpitations               | 20,879 | 13  | 7.2 [3.1-11.4]      | 25  | 13.3 [7.8-18.9]     | 0.54 [0.28-1.06] | 0.26 | -6.1 [(-13.0)-0.8]  |
| Paresthesia                | 20,922 | 6   | 3.5 [0.5-6.5]       | 4   | 2.0 [0.0-4.0]       | 1.77 [0.48-6.51] | 0.69 | 1.5 [(-2.1)-5.1]    |
| Rhinorrhea                 | 20,899 | 5   | 3.3 [0.3-6.2]       | 6   | 3.1 [0.6-5.6]       | 1.05 [0.33-3.34] | 0.99 | 0.2 [(-3.7)-4.1]    |
| Skin rash                  | 19,489 | 192 | 118.9 [101.3-136.4] | 202 | 118.6 [101.2-136.0] | 1.0 [0.83-1.21]  | 1.00 | 0.3 [(-24.5)-25.0]  |
| Sore throat                | 20,238 | 147 | 85.2 [70.6-99.7]    | 87  | 55.5 [42.9-68.0]    | 1.54 [1.2-1.97]  | 0.01 | 29.7 [10.5-48.9]    |
| Streptococcal tonsillitis  | 18,065 | 696 | 450.4 [414.4-486.5] | 525 | 400.4 [363.6-437.2] | 1.12 [1.05-1.21] | 0.02 | 50.0 [(-1.5)-101.5] |
| Tinnitus                   | 20,862 | 11  | 7.1 [2.7-11.5]      | 18  | 9.6 [4.9-14.3]      | 0.74 [0.36-1.52] | 0.70 | -2.5 [(-8.9)-3.9]   |
| Visual disturbances        | 20,644 | 45  | 22.1 [15.4-28.9]    | 41  | 24.6 [16.7-32.6]    | 0.9 [0.59-1.36]  | 0.86 | -2.5 [(-12.9)-7.9]  |
| Voice disorder             | 20,760 | 42  | 23.9 [16.4-31.4]    | 46  | 29.0 [19.6-38.4]    | 0.83 [0.56-1.22] | 0.64 | -5.1 [(-17.1)-6.9]  |
| Weakness                   | 20,642 | 64  | 36.1 [26.7-45.4]    | 53  | 32.7 [23.0-42.4]    | 1.1 [0.77-1.57]  | 0.85 | 3.4 [(-10.1)-16.8]  |
| Weight loss                | 20,914 | 5   | 3.3 [0.4-6.2]       | 10  | 5.9 [2.2-9.6]       | 0.56 [0.21-1.52] | 0.55 | -2.6 [(-7.3)-2.2]   |

\* Outcomes with 10 events or more.

**Table S4i**– Association of health outcomes\* with SARS-CoV-2 infection in unvaccinated individuals during Wild-Type and Alpha variants, 180-360 days post PCR test, age 12-18 years.

| Outcome                             | N      | SARS-CoV-2 Positive |                                               | SARS-CoV-2 Negative |                                               | Hazard Ratio<br>95%CI | Q<br>value | Risk Diff/10,000<br>persons |
|-------------------------------------|--------|---------------------|-----------------------------------------------|---------------------|-----------------------------------------------|-----------------------|------------|-----------------------------|
|                                     |        | No.<br>event<br>s   | Absolute<br>risk/10,000<br>persons<br>[95%CI] | No.<br>even<br>ts   | Absolute<br>risk/10,000<br>persons<br>[95%CI] |                       |            |                             |
| Abdominal pain                      | 21,647 | 543                 | 304.9 [278.2-331.7]                           | 737                 | 376.3 [347.5-405.1]                           | 0.81 [0.73-0.91]      | 0.00       | -69.8 [(-109.2)-(-30.5)]    |
| Anosmia and Dysgeusia               | 24,929 | 13                  | 6.1 [2.7-9.6]                                 | 4                   | 2.1 [-0.1-4.2]                                | 2.98 [1.07-8.3]       | 0.17       | 4.1 [(-0.0)-8.1]            |
| Anxiety                             | 22,618 | 75                  | 41.7 [31.9-51.5]                              | 91                  | 41.9 [32.9-51.0]                              | 0.99 [0.74-1.33]      | 1.00       | -0.2 [(-13.6)-13.1]         |
| Appendicitis                        | 23,693 | 16                  | 7.6 [3.6-11.5]                                | 34                  | 16.6 [10.8-22.4]                              | 0.46 [0.25-0.82]      | 0.07       | -9.0 [(-16.1)-(-2.0)]       |
| Arthralgia                          | 24,528 | 71                  | 33.7 [25.5-41.8]                              | 107                 | 43.1 [34.6-51.5]                              | 0.78 [0.58-1.06]      | 0.33       | -9.4 [(-21.1)-2.3]          |
| Bloody stool                        | 24,905 | 16                  | 8.3 [4.1-12.5]                                | 22                  | 9.6 [5.4-13.8]                                | 0.86 [0.48-1.56]      | 0.87       | -1.3 [(-7.3)-4.6]           |
| Cardiac arrhythmias                 | 24,625 | 8                   | 4.6 [1.4-7.8]                                 | 18                  | 7.0 [3.7-10.3]                                | 0.66 [0.31-1.41]      | 0.59       | -2.4 [(-7.0)-2.2]           |
| Celiac disease                      | 24,760 | 28                  | 11.9 [7.3-16.6]                               | 36                  | 13.7 [9.0-18.3]                               | 0.87 [0.56-1.35]      | 0.81       | -1.8 [(-8.3)-4.8]           |
| Chest pain                          | 24,195 | 222                 | 113.0 [97.5-128.5]                            | 256                 | 116.7 [101.5-131.9]                           | 0.97 [0.81-1.15]      | 0.92       | -3.7 [(-25.4)-18.0]         |
| Concentration and memory impairment | 24,930 | 13                  | 6.6 [2.9-10.4]                                | 17                  | 6.9 [3.6-10.3]                                | 0.95 [0.47-1.92]      | 0.98       | -0.3 [(-5.4)-4.7]           |
| Conjunctivitis                      | 23,395 | 270                 | 133.5 [116.7-150.3]                           | 278                 | 128.5 [112.5-144.4]                           | 1.04 [0.89-1.22]      | 0.87       | 5.1 [(-18.1)-28.3]          |
| Convulsions                         | 23,252 | 9                   | 3.7 [1.2-6.1]                                 | 7                   | 3.1 [0.7-5.4]                                 | 1.2 [0.44-3.3]        | 0.92       | 0.6 [(-2.7)-4.0]            |
| Cough                               | 22,577 | 428                 | 227.0 [204.5-249.6]                           | 441                 | 219.8 [197.9-241.6]                           | 1.03 [0.91-1.17]      | 0.86       | 7.3 [(-24.1)-38.7]          |
| Depression                          | 24,569 | 23                  | 13.5 [7.9-19.2]                               | 47                  | 19.6 [13.7-25.5]                              | 0.69 [0.43-1.1]       | 0.34       | -6.0 [(-14.2)-2.1]          |
| Diseases of the nervous system      | 24,500 | 14                  | 6.8 [3.1-10.5]                                | 11                  | 4.2 [1.7-6.7]                                 | 1.63 [0.72-3.73]      | 0.54       | 2.6 [(-1.9)-7.1]            |
| Diseases of the pleura              | 24,918 | 4                   | 1.9 [-0.0-3.9]                                | 6                   | 2.7 [0.4-5.1]                                 | 0.7 [0.18-2.66]       | 0.85       | -0.8 [(-3.9)-2.2]           |
| Dizziness                           | 24,473 | 110                 | 51.8 [41.6-61.9]                              | 123                 | 53.3 [43.5-63.1]                              | 0.97 [0.75-1.25]      | 0.95       | -1.6 [(-15.6)-12.5]         |
| Dyspnea                             | 24,466 | 133                 | 68.0 [56.0-80.0]                              | 158                 | 66.6 [55.7-77.5]                              | 1.02 [0.82-1.26]      | 0.98       | 1.6 [(-14.7)-17.8]          |
| Fatty Liver                         | 24,703 | 11                  | 5.0 [2.0-7.9]                                 | 20                  | 8.2 [4.4-12.0]                                | 0.6 [0.28-1.29]       | 0.47       | -3.3 [(-8.1)-1.6]           |
| Hair loss                           | 24,606 | 85                  | 41.5 [32.2-50.7]                              | 95                  | 41.3 [32.5-50.1]                              | 1.0 [0.76-1.33]       | 1.00       | 0.2 [(-12.6)-12.9]          |
| Headache                            | 22,767 | 389                 | 206.7 [185.2-228.2]                           | 428                 | 202.0 [181.7-222.2]                           | 1.02 [0.9-1.17]       | 0.92       | 4.7 [(-24.8)-34.2]          |
| Herpes Simplex                      | 20,733 | 38                  | 21.0 [13.9-28.0]                              | 24                  | 12.1 [6.8-17.3]                               | 1.74 [1.04-2.91]      | 0.17       | 8.9 [0.1-17.7]              |
| Herpes Zoster                       | 24,887 | 16                  | 7.1 [3.4-10.8]                                | 26                  | 12.6 [7.2-18.0]                               | 0.56 [0.31-1.03]      | 0.23       | -5.5 [(-12.1)-1.0]          |
| Hospitalization                     | 23,698 | 197                 | 97.3 [83.1-111.5]                             | 251                 | 115.8 [100.6-131.0]                           | 0.77 [0.63-0.94]      | 0.39       | -17.7 [(-39.5)-4.1]         |
| Hyperreactive                       | 11,982 | 18                  | 16.9 [8.9-]                                   | 22                  | 18.9 [10.4-]                                  | 0.9 [0.49-1.64]       | 0.92       | -2.0 [(-13.6)-9.7]          |



|                            |        |     |                     |     |                    |                  |        |                        |
|----------------------------|--------|-----|---------------------|-----|--------------------|------------------|--------|------------------------|
| Airway Disease             |        |     | 25.0]               |     | 27.3]              |                  |        |                        |
| Hypertension               | 24,648 | 10  | 4.2 [1.5-7.0]       | 10  | 4.1 [1.5-6.7]      | 1.04 [0.42-2.57] | 0.99   | 0.2 [(-3.6)-3.9]       |
| Ischemic heart disease     | 24,927 | 6   | 2.7 [0.4-4.9]       | 5   | 1.9 [0.2-3.6]      | 1.4 [0.42-4.67]  | 0.85   | 0.8 [(-2.1)-3.6]       |
| Loss of appetite           | 24,551 | 76  | 37.2 [28.6-45.9]    | 117 | 49.6 [40.0-59.2]   | 0.75 [0.57-0.98] | 0.18   | -12.4 [(-25.3)-0.6]    |
| Lymphadenopathy            | 24,639 | 73  | 35.8 [27.3-44.3]    | 104 | 46.7 [37.1-56.3]   | 0.77 [0.58-1.02] | 0.25   | -10.9 [(-23.7)-2.0]    |
| Menstruation abnormalities | 23,541 | 109 | 59.5 [48.0-71.0]    | 151 | 66.6 [55.3-77.8]   | 0.89 [0.73-1.1]  | 0.59   | -7.0 [(-23.1)-9.1]     |
| Myalgia                    | 24,549 | 83  | 39.9 [31.0-48.9]    | 116 | 53.0 [42.6-63.4]   | 0.75 [0.57-0.99] | 0.19   | -13.0 [(-26.7)-0.7]    |
| Nausea or vomiting         | 24,231 | 133 | 68.9 [56.8-80.9]    | 194 | 87.9 [75.0-100.8]  | 0.78 [0.63-0.97] | 0.13   | -19.1 [(-36.7)-(-1.4)] |
| Palpitations               | 24,755 | 62  | 29.2 [21.6-36.7]    | 81  | 33.6 [26.0-41.2]   | 0.87 [0.63-1.2]  | 0.69   | -4.4 [(-15.2)-6.3]     |
| Paresthesia                | 24,911 | 22  | 10.4 [5.9-15.0]     | 27  | 11.7 [7.0-16.5]    | 0.89 [0.51-1.56] | 0.91   | -1.3 [(-7.8)-5.3]      |
| Psychosis                  | 24,753 | 10  | 3.7 [1.3-6.1]       | 14  | 6.3 [2.8-9.9]      | 0.59 [0.27-1.29] | 0.46   | -2.6 [(-6.9)-1.7]      |
| Rhinorrhea                 | 24,948 | 10  | 4.7 [1.6-7.7]       | 16  | 6.4 [3.1-9.6]      | 0.73 [0.34-1.59] | 0.73   | -1.7 [(-6.1)-2.7]      |
| Skin rash                  | 24,100 | 126 | 64.4 [52.7-76.1]    | 203 | 92.2 [78.6-105.9]  | 0.7 [0.57-0.86]  | 0.01   | -27.9 [(-45.8)-(-9.9)] |
| Sore throat                | 24,296 | 147 | 69.2 [57.4-80.9]    | 138 | 67.7 [55.7-79.7]   | 1.02 [0.82-1.27] | 0.97   | 1.4 [(-15.3)-18.2]     |
| Streptococcal tonsillitis  | 23,592 | 365 | 160.7 [143.0-178.4] | 183 | 103.3 [86.9-119.8] | 1.55 [1.33-1.81] | <0.001 | 57.3 [33.2-81.4]       |
| Tinnitus                   | 24,820 | 26  | 12.3 [7.3-17.3]     | 57  | 24.3 [17.6-31.0]   | 0.51 [0.31-0.83] | 0.05   | -12.0 [(-20.3)-(-3.7)] |
| Tremor                     | 24,913 | 17  | 8.2 [4.2-12.3]      | 16  | 6.8 [3.3-10.3]     | 1.21 [0.62-2.36] | 0.84   | 1.4 [(-4.0)-6.8]       |
| Visual disturbances        | 24,725 | 56  | 27.0 [19.6-34.5]    | 57  | 25.4 [18.3-32.5]   | 1.07 [0.75-1.51] | 0.92   | 1.7 [(-8.6)-11.9]      |
| Voice disorder             | 24,832 | 43  | 17.0 [11.6-22.4]    | 36  | 22.5 [14.4-30.6]   | 0.76 [0.5-1.14]  | 0.45   | -5.5 [(-15.2)-4.2]     |
| Weakness                   | 23,960 | 283 | 126.9 [111.3-142.5] | 226 | 109.0 [93.6-124.5] | 1.16 [0.98-1.38] | 0.26   | 17.9 [(-4.1)-39.8]     |
| Weight loss                | 24,760 | 35  | 17.6 [11.6-23.6]    | 66  | 27.1 [20.2-34.0]   | 0.65 [0.44-0.96] | 0.15   | -9.4 [(-18.6)-(-0.3)]  |

**Table S4j**– Association of health outcomes\* with SARS-CoV-2 infection in unvaccinated individuals during Wild-Type and Alpha variants, 180-360 days post PCR test, age 19-40 years.

| Outcome                                | N      | SARS-CoV-2 Positive |                                               | SARS-CoV-2 Negative |                                               | Hazard Ratio<br>95%CI | Q<br>value | Risk Diff/10,000<br>persons |
|----------------------------------------|--------|---------------------|-----------------------------------------------|---------------------|-----------------------------------------------|-----------------------|------------|-----------------------------|
|                                        |        | No.<br>event<br>s   | Absolute<br>risk/10,000<br>persons<br>[95%CI] | No.<br>even<br>ts   | Absolute<br>risk/10,000<br>persons<br>[95%CI] |                       |            |                             |
| Abdominal pain                         | 41,719 | 1,867               | 521.3 [496.9-545.8]                           | 1,881               | 491.7 [468.2-515.2]                           | 1.07 [1.0-1.14]       | 0.24       | 32.5 [(-1.4)-66.4]          |
| Anosmia and<br>Dysgeusia               | 51,606 | 83                  | 18.8 [14.6-22.9]                              | 27                  | 5.6 [3.3-7.8]                                 | 3.38 [2.13-5.37]      | <0.001     | 13.2 [8.5-17.9]             |
| Anxiety                                | 40,121 | 197                 | 57.5 [49.2-65.7]                              | 230                 | 57.9 [49.9-65.8]                              | 0.99 [0.81-1.21]      | 1.00       | -0.4 [(-11.9)-11.1]         |
| Appendicitis                           | 47,164 | 28                  | 6.7 [4.1-9.2]                                 | 46                  | 9.3 [6.5-12.1]                                | 0.72 [0.44-1.17]      | 0.46       | -2.6 [(-6.4)-1.2]           |
| Arthralgia                             | 50,095 | 367                 | 82.1 [73.4-90.8]                              | 389                 | 81.0 [72.5-89.5]                              | 1.01 [0.87-1.18]      | 0.97       | 1.1 [(-11.0)-13.3]          |
| Bloody stool                           | 51,603 | 56                  | 12.7 [9.2-16.1]                               | 67                  | 14.2 [10.6-17.8]                              | 0.89 [0.61-1.3]       | 0.81       | -1.5 [(-6.5)-3.5]           |
| Cardiac arrhythmias                    | 49,992 | 24                  | 5.4 [3.2-7.6]                                 | 38                  | 8.2 [5.4-11.1]                                | 0.66 [0.38-1.13]      | 0.37       | -2.8 [(-6.4)-0.8]           |
| Celiac disease                         | 51,629 | 32                  | 6.2 [3.9-8.5]                                 | 26                  | 5.9 [3.5-8.3]                                 | 1.06 [0.61-1.85]      | 0.96       | 0.4 [(-3.0)-3.7]            |
| Chest pain                             | 48,279 | 848                 | 201.3 [187.2-215.4]                           | 897                 | 198.4 [184.7-212.2]                           | 1.01 [0.92-1.12]      | 0.93       | 2.8 [(-16.8)-22.5]          |
| Concentration and<br>memory impairment | 51,562 | 123                 | 30.1 [24.7-35.6]                              | 63                  | 12.7 [9.4-16.1]                               | 2.36 [1.71-3.27]      | <0.001     | 17.4 [11.0-23.8]            |
| Conjunctivitis                         | 48,437 | 669                 | 153.0 [140.8-165.1]                           | 629                 | 143.8 [131.6-155.9]                           | 1.06 [0.95-1.2]       | 0.59       | 9.2 [(-8.0)-26.4]           |
| Convulsions                            | 49,490 | 10                  | 1.8 [0.6-3.1]                                 | 13                  | 3.2 [1.4-5.0]                                 | 0.62 [0.25-1.51]      | 0.59       | -1.1 [(-3.3)-1.0]           |
| Cough                                  | 45,976 | 978                 | 242.7 [226.8-258.5]                           | 934                 | 221.1 [206.0-236.3]                           | 1.1 [1.0-1.21]        | 0.22       | 21.5 [(-0.4)-43.5]          |
| Depression                             | 46,053 | 106                 | 26.7 [21.5-32.0]                              | 115                 | 24.3 [19.5-29.0]                              | 1.1 [0.84-1.45]       | 0.77       | 2.5 [(-4.6)-9.5]            |
| Diabetes Mellitus                      | 51,084 | 30                  | 6.0 [3.8-8.2]                                 | 22                  | 5.1 [2.8-7.3]                                 | 1.18 [0.66-2.13]      | 0.83       | 0.9 [(-2.3)-4.1]            |
| Diarrhea                               | 51,752 | 8                   | 2.2 [0.6-3.7]                                 | 17                  | 3.3 [1.7-5.0]                                 | 0.64 [0.27-1.55]      | 0.62       | -1.2 [(-3.4)-1.0]           |
| Diseases of the<br>nervous system      | 46,415 | 133                 | 31.9 [26.3-37.6]                              | 134                 | 30.8 [25.3-36.4]                              | 1.04 [0.8-1.34]       | 0.93       | 1.1 [(-6.8)-9.0]            |
| Dizziness                              | 49,593 | 526                 | 120.8 [110.1-131.5]                           | 493                 | 108.1 [98.0-118.3]                            | 1.12 [0.98-1.27]      | 0.30       | 12.7 [(-2.1)-27.4]          |
| Dyspnea                                | 50,368 | 437                 | 100.5 [90.8-110.3]                            | 304                 | 65.1 [57.4-72.9]                              | 1.55 [1.33-1.81]      | <0.001     | 37.1 [24.7-49.5]            |
| Epilepsy                               | 50,088 | 15                  | 3.3 [1.5-5.0]                                 | 9                   | 2.5 [0.7-4.2]                                 | 1.33 [0.53-3.32]      | 0.80       | 0.8 [(-1.6)-3.3]            |
| Fatty Liver                            | 48,703 | 133                 | 31.4 [25.9-37.0]                              | 121                 | 28.7 [23.2-34.1]                              | 1.1 [0.84-1.43]       | 0.77       | 2.8 [(-5.0)-10.5]           |
| Hair loss                              | 49,962 | 296                 | 72.4 [63.9-80.8]                              | 374                 | 77.9 [69.5-86.2]                              | 0.93 [0.79-1.09]      | 0.67       | -5.5 [(-17.4)-6.4]          |
| Headache                               | 44,793 | 1,190               | 300.7 [283.0-318.5]                           | 1,368               | 334.8 [316.1-353.5]                           | 0.9 [0.83-0.98]       | 0.08       | -34.1 [(-59.9)-(-8.3)]      |
| Herpes Simplex                         | 38,699 | 72                  | 20.6 [15.6-25.5]                              | 85                  | 21.7 [16.8-26.7]                              | 0.95 [0.68-1.32]      | 0.92       | -1.2 [(-8.2)-5.8]           |

|                              |        |     |                     |     |                     |                  |      |                        |
|------------------------------|--------|-----|---------------------|-----|---------------------|------------------|------|------------------------|
| Herpes Zoster                | 51,431 | 87  | 19.3 [15.1-23.5]    | 103 | 21.9 [17.3-26.5]    | 0.88 [0.65-1.2]  | 0.70 | -2.6 [(-8.9)-3.6]      |
| Hospitalization              | 47,389 | 918 | 205.1 [191.1-219.2] | 831 | 204.2 [189.4-219.1] | 0.92 [0.83-1.03] | 0.91 | 2.6 [(-21.3)-26.4]     |
| Hyperhidrosis                | 51,725 | 15  | 3.9 [2.0-5.9]       | 23  | 4.0 [2.2-5.8]       | 0.98 [0.49-1.95] | 1.00 | -0.1 [(-2.7)-2.6]      |
| Hyperreactive Airway Disease | 27,603 | 49  | 19.0 [13.5-24.6]    | 43  | 17.6 [11.9-23.2]    | 1.08 [0.7-1.68]  | 0.92 | 1.5 [(-6.5)-9.4]       |
| Hypertension                 | 48,809 | 53  | 11.6 [8.3-14.8]     | 38  | 8.7 [5.7-11.6]      | 1.34 [0.86-2.08] | 0.48 | 2.9 [(-1.5)-7.3]       |
| Insomnia                     | 51,780 | 9   | 2.5 [0.9-4.1]       | 12  | 2.2 [0.9-3.5]       | 1.15 [0.47-2.79] | 0.92 | 0.3 [(-1.8)-2.4]       |
| Invasive pneumococcal        | 50,305 | 11  | 2.1 [0.8-3.5]       | 8   | 2.2 [0.5-3.9]       | 0.98 [0.36-2.68] | 1    | -0.1 [(-2.2)-2.1]      |
| Ischemic heart disease       | 51,422 | 14  | 3.1 [1.4-4.8]       | 16  | 3.5 [1.7-5.3]       | 0.89 [0.42-1.89] | 0.93 | -0.4 [(-2.8)-2.1]      |
| Loss of appetite             | 50,954 | 162 | 37.0 [31.1-42.9]    | 209 | 41.3 [35.4-47.2]    | 0.9 [0.72-1.11]  | 0.61 | -4.3 [(-12.7)-4.1]     |
| Lymphadenopathy              | 51,005 | 188 | 44.7 [38.1-51.2]    | 249 | 47.9 [41.6-54.2]    | 0.93 [0.76-1.14] | 0.77 | -3.3 [(-12.3)-5.8]     |
| Menstruation abnormalities   | 35,483 | 188 | 58.4 [49.7-67.1]    | 185 | 62.4 [53.1-71.8]    | 0.94 [0.75-1.16] | 0.80 | -4.0 [(-16.9)-8.8]     |
| Muscle atrophy               | 51,753 | 20  | 4.9 [2.7-7.1]       | 15  | 3.4 [1.5-5.4]       | 1.42 [0.68-2.96] | 0.65 | 1.4 [(-1.5)-4.4]       |
| Myalgia                      | 49,738 | 450 | 103.1 [93.2-113.0]  | 465 | 102.2 [92.4-112.0]  | 1.01 [0.88-1.16] | 0.98 | 0.9 [(-13.0)-14.8]     |
| Myocarditis                  | 51,804 | 6   | 1.4 [0.3-2.5]       | 7   | 1.3 [0.3-2.2]       | 1.12 [0.37-3.36] | 0.96 | 0.2 [(-1.3)-1.6]       |
| Nausea or vomiting           | 49,797 | 480 | 110.5 [100.3-120.8] | 515 | 110.7 [100.6-120.9] | 1.0 [0.88-1.14]  | 1.00 | -0.2 [(-14.6)-14.2]    |
| Palpitations                 | 50,643 | 284 | 65.0 [57.2-72.7]    | 276 | 57.2 [50.0-64.3]    | 1.14 [0.95-1.35] | 0.40 | 7.8 [(-2.8)-18.3]      |
| Paresthesia                  | 50,723 | 224 | 49.9 [43.1-56.8]    | 315 | 62.2 [54.9-69.5]    | 0.8 [0.67-0.96]  | 0.11 | -12.2 [(-22.2)-(-2.2)] |
| Pericarditis                 | 51,490 | 13  | 2.9 [1.3-4.5]       | 11  | 2.1 [0.8-3.4]       | 1.36 [0.59-3.1]  | 0.75 | 0.8 [(-1.3)-2.8]       |
| Psychosis                    | 50,561 | 19  | 3.4 [1.8-5.1]       | 22  | 5.7 [3.2-8.2]       | 0.6 [0.31-1.18]  | 0.37 | -2.3 [(-5.3)-0.7]      |
| Pulmonary disease            | 50,849 | 6   | 1.4 [0.2-2.6]       | 11  | 2.3 [0.9-3.7]       | 0.61 [0.21-1.77] | 0.66 | -0.9 [(-2.7)-0.9]      |
| Respiratory disorders        | 51,347 | 4   | 1.0 [0.0-1.9]       | 6   | 1.5 [0.2-2.9]       | 0.64 [0.17-2.39] | 0.78 | -0.6 [(-2.2)-1.1]      |
| Rhinorrhea                   | 51,734 | 17  | 4.4 [2.3-6.5]       | 16  | 3.2 [1.6-4.8]       | 1.37 [0.68-2.76] | 0.68 | 1.2 [(-1.5)-3.8]       |
| Skin rash                    | 50,472 | 265 | 61.4 [53.7-69.0]    | 311 | 61.5 [54.3-68.7]    | 1.0 [0.84-1.18]  | 1.00 | -0.1 [(-10.6)-10.4]    |
| Sore throat                  | 50,251 | 324 | 72.0 [63.8-80.2]    | 329 | 73.8 [65.4-82.2]    | 0.98 [0.83-1.15] | 0.93 | -1.8 [(-13.5)-10.0]    |
| Streptococcal tonsillitis    | 49,856 | 584 | 120.5 [110.0-131.0] | 397 | 102.1 [91.2-113.0]  | 1.18 [1.03-1.36] | 0.12 | 18.4 [3.3-33.6]        |
| Tinnitus                     | 50,954 | 198 | 46.4 [39.8-53.0]    | 237 | 45.6 [39.5-51.7]    | 1.02 [0.84-1.24] | 0.97 | 0.8 [(-8.2)-9.8]       |
| Tremor                       | 51,632 | 52  | 10.8 [7.7-13.9]     | 44  | 8.7 [6.0-11.5]      | 1.24 [0.81-1.9]  | 0.62 | 2.1 [(-2.0)-6.2]       |
| Venous thromboembolism       | 51,532 | 64  | 13.7 [10.1-17.2]    | 57  | 13.7 [9.9-17.5]     | 1.0 [0.68-1.48]  | 1.00 | 0.0 [(-5.2)-5.2]       |
| Visual disturbances          | 51,198 | 136 | 29.8 [24.6-35.0]    | 142 | 29.4 [24.2-34.7]    | 1.01 [0.79-1.3]  | 0.99 | 0.4 [(-7.0)-7.7]       |
| Voice disorder               | 51,244 | 151 | 31.5 [26.2-         | 136 | 29.4 [24.1-         | 1.07 [0.83-      | 0.84 | 2.1 [(-5.5)-9.6]       |

|             |        |       |                     |     |                     |                  |        |                    |
|-------------|--------|-------|---------------------|-----|---------------------|------------------|--------|--------------------|
|             |        |       | 36.9]               |     | 34.8]               | 1.37]            |        |                    |
| Weakness    | 46,870 | 1,189 | 275.0 [258.5-291.5] | 848 | 207.6 [192.8-222.5] | 1.32 [1.2-1.46]  | <0.001 | 67.3 [45.1-89.5]   |
| Weight loss | 51,281 | 93    | 21.3 [16.8-25.7]    | 137 | 26.4 [21.7-31.1]    | 0.81 [0.61-1.06] | 0.36   | -5.1 [(-11.6)-1.4] |

\* Outcomes with 10 events or more.

**Table S4k**– Association of health outcomes\* with SARS-CoV-2 infection in unvaccinated individuals during Wild-Type and Alpha variants, 180-360 days post PCR test, age 41-60 years.

| Outcome                                | N      | SARS-CoV-2 Positive |                                               | SARS-CoV-2 Negative |                                               | Hazard Ratio<br>95%CI | Q<br>value | Risk Diff/10,000<br>persons |
|----------------------------------------|--------|---------------------|-----------------------------------------------|---------------------|-----------------------------------------------|-----------------------|------------|-----------------------------|
|                                        |        | No.<br>event<br>s   | Absolute<br>risk/10,000<br>persons<br>[95%CI] | No.<br>even<br>ts   | Absolute<br>risk/10,000<br>persons<br>[95%CI] |                       |            |                             |
| Abdominal pain                         | 25,748 | 1,110               | 475.2 [446.2-504.1]                           | 1,164               | 489.7 [459.9-519.4]                           | 0.98 [0.9-1.05]       | 0.79       | -12.0 [(-53.5)-29.6]        |
| Anosmia and<br>Dysgeusia               | 31,913 | 92                  | 33.2 [26.4-40.0]                              | 33                  | 10.7 [6.7-14.7]                               | 3.1 [2.26-4.25]       | <0.001     | 22.5 [14.6-30.4]            |
| Anxiety                                | 19,066 | 99                  | 56.4 [44.9-67.8]                              | 100                 | 56.0 [44.2-67.7]                              | 1.01 [0.78-1.31]      | 1.00       | 0.4 [(-16.0)-16.8]          |
| Appendicitis                           | 30,004 | 19                  | 6.7 [3.6-9.7]                                 | 9                   | 3.6 [1.2-6.0]                                 | 1.86 [0.87-3.96]      | 0.32       | 3.1 [(-0.8)-6.9]            |
| Arthralgia                             | 29,649 | 542                 | 194.8 [178.0-211.6]                           | 436                 | 155.2 [139.9-170.4]                           | 1.26 [1.13-1.4]       | <0.001     | 39.6 [16.9-62.3]            |
| Bloody stool                           | 31,825 | 66                  | 21.6 [16.2-27.0]                              | 60                  | 20.9 [15.2-26.5]                              | 1.04 [0.79-1.36]      | 0.94       | 0.7 [(-7.1)-8.6]            |
| Cardiac arrhythmias                    | 29,111 | 35                  | 12.4 [8.1-16.7]                               | 39                  | 15.6 [10.2-21.0]                              | 0.79 [0.55-1.14]      | 0.50       | -3.2 [(-10.1)-3.7]          |
| Celiac disease                         | 31,959 | 18                  | 6.2 [3.2-9.1]                                 | 22                  | 7.8 [4.3-11.3]                                | 0.8 [0.47-1.36]       | 0.70       | -1.6 [(-6.1)-3.0]           |
| Chest pain                             | 27,781 | 916                 | 362.2 [338.0-386.3]                           | 894                 | 347.1 [323.0-371.2]                           | 1.04 [0.96-1.13]      | 0.59       | 15.1 [(-19.1)-49.2]         |
| Chronic kidney<br>disease              | 31,541 | 20                  | 8.2 [5.0-11.4]                                | 12                  | 5.9 [2.8-9.1]                                 | 1.33 [0.31-5.64]      | 0.92       | 1.6 [(-2.6)-5.7]            |
| Concentration and<br>memory impairment | 31,721 | 166                 | 60.7 [51.4-70.1]                              | 95                  | 31.5 [24.8-38.2]                              | 1.93 [1.61-2.3]       | <0.001     | 29.2 [17.7-40.7]            |
| Congestive heart<br>failure            | 31,743 | 6                   | 1.8 [0.3-3.4]                                 | 15                  | 5.1 [2.4-7.8]                                 | 0.36 [0.13-0.99]      | 0.20       | -3.2 [(-6.4)-(-0.1)]        |
| Conjunctivitis                         | 29,707 | 373                 | 137.5 [122.9-152.0]                           | 396                 | 143.2 [128.2-158.3]                           | 0.96 [0.85-1.09]      | 0.80       | -5.8 [(-26.7)-15.1]         |
| Convulsions                            | 31,574 | 3                   | 0.9 [-0.1-1.9]                                | 10                  | 3.3 [1.2-5.5]                                 | 0.27 [0.07-0.99]      | 0.20       | -2.4 [(-4.7)-(-0.0)]        |
| Cough                                  | 27,668 | 717                 | 279.7 [258.4-301.0]                           | 719                 | 285.4 [263.3-307.6]                           | 0.98 [0.89-1.08]      | 0.89       | -5.8 [(-36.5)-25.0]         |
| Depression                             | 23,763 | 62                  | 29.1 [21.7-36.5]                              | 70                  | 30.1 [22.7-37.6]                              | 0.97 [0.7-1.34]       | 0.97       | -1.0 [(-11.5)-9.5]          |
| Diabetes Mellitus                      | 27,709 | 130                 | 48.9 [40.3-57.5]                              | 106                 | 44.6 [35.8-53.4]                              | 1.1 [0.84-1.44]       | 0.78       | 4.3 [(-8.0)-16.6]           |
| Diseases of the<br>nervous system      | 20,426 | 142                 | 72.5 [60.2-84.8]                              | 118                 | 64.1 [51.9-76.3]                              | 1.13 [0.92-1.4]       | 0.54       | 8.4 [(-8.9)-25.8]           |
| Dizziness                              | 29,571 | 586                 | 212.2 [194.5-229.8]                           | 464                 | 170.1 [153.8-186.5]                           | 1.25 [1.13-1.38]      | <0.001     | 42.0 [18.0-66.1]            |
| Dyspnea                                | 30,610 | 534                 | 192.1 [175.3-208.9]                           | 340                 | 122.3 [108.7-135.8]                           | 1.59 [1.42-1.78]      | <0.001     | 72.8 [51.3-94.3]            |
| Fatty Liver                            | 25,049 | 161                 | 72.4 [61.0-83.7]                              | 139                 | 60.3 [49.8-70.9]                              | 1.2 [1.01-1.42]       | 0.16       | 12.0 [(-3.5)-27.5]          |
| Hair loss                              | 31,336 | 121                 | 46.7 [38.3-55.2]                              | 157                 | 49.0 [40.9-57.1]                              | 0.95 [0.77-1.19]      | 0.90       | -2.3 [(-14.0)-9.5]          |
| Headache                               | 27,288 | 855                 | 345.0 [321.3-368.8]                           | 828                 | 330.6 [306.8-354.4]                           | 1.04 [0.96-1.14]      | 0.63       | 14.5 [(-19.2)-48.1]         |
| Herpes Simplex                         | 23,568 | 41                  | 19.0 [13.0-24.9]                              | 56                  | 24.9 [18.0-31.7]                              | 0.76 [0.52-1.12]      | 0.42       | -5.9 [(-15.0)-3.2]          |
| Herpes Zoster                          | 31,625 | 97                  | 33.4 [26.6-                                   | 114                 | 37.4 [30.1-                                   | 0.89 [0.73-           | 0.58       | -4.0 [(-14.1)-6.0]          |

|                              |        |     |                     |     |                     |                  |      |                        |
|------------------------------|--------|-----|---------------------|-----|---------------------|------------------|------|------------------------|
|                              |        |     | 40.3]               |     | 44.8]               | 1.09]            |      |                        |
| Hospitalization              | 28,338 | 636 | 239.4 [220.1-258.8] | 669 | 259.9 [239.0-280.8] | 0.84 [0.74-0.96] | 0.71 | -18.5 [(-50.6)-13.6]   |
| Hyperhidrosis                | 32,012 | 3   | 0.9 [-0.2-1.9]      | 17  | 5.1 [2.6-7.7]       | 0.17 [0.05-0.61] | 0.05 | -4.3 [(-7.0)-(-1.5)]   |
| Hyperreactive Airway Disease | 21,515 | 36  | 15.5 [10.2-20.7]    | 29  | 13.8 [8.6-19.1]     | 1.12 [0.71-1.77] | 0.87 | 1.6 [(-5.8)-9.1]       |
| Hypertension                 | 20,534 | 148 | 76.1 [63.7-88.5]    | 133 | 68.7 [56.3-81.1]    | 1.11 [1.01-1.21] | 0.15 | 7.3 [(-10.2)-24.9]     |
| Insomnia                     | 32,050 | 8   | 2.8 [0.8-4.8]       | 4   | 1.8 [-0.1-3.7]      | 1.56 [0.58-4.23] | 0.68 | 1.0 [(-1.7)-3.8]       |
| Invasive pneumococcal        | 30,758 | 9   | 3.5 [1.2-5.8]       | 9   | 2.8 [0.9-4.7]       | 1.24 [0.69-2.23] | 0.76 | 0.7 [(-2.3)-3.7]       |
| Ischemic heart disease       | 29,567 | 69  | 24.4 [18.5-30.3]    | 98  | 35.0 [27.6-42.4]    | 0.7 [0.5-0.97]   | 0.15 | -10.6 [(-20.1)-(-1.1)] |
| Ischemic stroke and TIA      | 30,924 | 29  | 9.6 [6.0-13.3]      | 29  | 11.2 [6.9-15.4]     | 0.86 [0.27-2.78] | 0.94 | -1.5 [(-7.1)-4.0]      |
| Loss of appetite             | 31,439 | 164 | 58.8 [49.5-68.0]    | 179 | 58.8 [49.6-68.1]    | 1.0 [0.83-1.2]   | 1.00 | -0.1 [(-13.1)-12.9]    |
| Lymphadenopathy              | 31,590 | 97  | 34.6 [27.6-41.6]    | 139 | 43.5 [35.9-51.0]    | 0.8 [0.62-1.02]  | 0.24 | -8.9 [(-19.2)-1.4]     |
| Menstruation abnormalities   | 17,490 | 42  | 26.7 [18.3-35.2]    | 37  | 21.3 [13.9-28.7]    | 1.25 [0.82-1.92] | 0.60 | 5.4 [(-5.8)-16.6]      |
| Muscle atrophy               | 32,005 | 25  | 8.6 [5.1-12.0]      | 29  | 9.9 [6.1-13.7]      | 0.86 [0.5-1.5]   | 0.85 | -1.3 [(-6.5)-3.8]      |
| Myalgia                      | 29,825 | 492 | 180.0 [163.7-196.3] | 442 | 157.2 [141.7-172.6] | 1.15 [1.03-1.27] | 0.09 | 22.9 [0.4-45.3]        |
| Nausea or vomiting           | 31,294 | 189 | 62.9 [53.6-72.2]    | 226 | 76.0 [65.7-86.4]    | 0.83 [0.69-1.0]  | 0.19 | -13.1 [(-27.1)-0.8]    |
| Palpitations                 | 30,842 | 321 | 111.2 [98.7-123.7]  | 267 | 91.1 [79.7-102.6]   | 1.22 [1.06-1.4]  | 0.04 | 20.0 [3.1-37.0]        |
| Paresthesia                  | 30,610 | 346 | 125.6 [112.2-139.1] | 394 | 136.2 [121.9-150.5] | 0.92 [0.82-1.04] | 0.47 | -10.6 [(-30.2)-9.0]    |
| Pericarditis                 | 31,658 | 7   | 2.4 [0.6-4.3]       | 7   | 2.4 [0.6-4.3]       | 1.0 [0.37-2.71]  | 1.00 | 0.0 [(-2.6)-2.6]       |
| Psychosis                    | 31,060 | 13  | 3.5 [1.5-5.5]       | 14  | 4.8 [2.2-7.4]       | 0.73 [0.36-1.47] | 0.68 | -1.3 [(-4.6)-2.0]      |
| Pulmonary disease            | 30,175 | 32  | 12.1 [7.9-16.3]     | 29  | 9.5 [5.9-13.2]      | 1.27 [0.76-2.12] | 0.66 | 2.6 [(-3.0)-8.1]       |
| Respiratory disorders        | 31,674 | 8   | 2.9 [0.9-5.0]       | 12  | 4.2 [1.6-6.7]       | 0.71 [0.28-1.82] | 0.75 | -1.2 [(-4.5)-2.1]      |
| Rhinorrhea                   | 32,021 | 14  | 4.6 [2.1-7.1]       | 17  | 5.3 [2.6-7.9]       | 0.88 [0.46-1.72] | 0.92 | -0.6 [(-4.2)-3.0]      |
| Skin rash                    | 31,385 | 175 | 64.4 [54.5-74.3]    | 181 | 60.7 [51.2-70.2]    | 1.06 [0.88-1.29] | 0.81 | 3.7 [(-10.0)-17.5]     |
| Sore throat                  | 31,359 | 122 | 41.3 [33.7-48.9]    | 120 | 39.7 [32.2-47.1]    | 1.04 [0.82-1.32] | 0.92 | 1.6 [(-9.0)-12.3]      |
| Streptococcal tonsillitis    | 31,516 | 105 | 33.1 [26.3-39.9]    | 65  | 24.0 [17.6-30.3]    | 1.38 [1.03-1.86] | 0.16 | 9.1 [(-0.2)-18.4]      |
| Tinnitus                     | 31,054 | 192 | 65.6 [56.0-75.1]    | 234 | 78.8 [68.2-89.4]    | 0.83 [0.7-0.99]  | 0.18 | -13.2 [(-27.5)-1.1]    |
| Tremor                       | 31,920 | 40  | 12.7 [8.6-16.7]     | 56  | 19.1 [13.8-24.4]    | 0.66 [0.46-0.96] | 0.15 | -6.4 [(-13.1)-0.2]     |
| Venous thromboembolism       | 31,752 | 82  | 26.0 [20.1-32.0]    | 75  | 26.7 [20.2-33.1]    | 0.98 [0.82-1.16] | 0.93 | -0.6 [(-9.4)-8.1]      |
| Visual disturbances          | 31,434 | 141 | 48.5 [40.3-56.7]    | 140 | 48.7 [39.9-57.4]    | 1.0 [0.82-1.21]  | 1.00 | -0.1 [(-12.1)-11.9]    |
| Voice disorder               | 31,592 | 136 | 43.3 [35.6-51.0]    | 113 | 39.4 [31.6-47.2]    | 1.1 [0.88-1.37]  | 0.69 | 3.9 [(-7.0)-14.9]      |

|             |        |     |                     |     |                     |                  |        |                    |
|-------------|--------|-----|---------------------|-----|---------------------|------------------|--------|--------------------|
| Weakness    | 28,693 | 923 | 339.5 [316.7-362.2] | 658 | 250.6 [230.3-271.0] | 1.35 [1.24-1.47] | <0.001 | 88.8 [58.3-119.3]  |
| Weight loss | 31,693 | 91  | 31.5 [24.8-38.1]    | 99  | 33.4 [26.4-40.5]    | 0.94 [0.73-1.21] | 0.87   | -2.0 [(-11.7)-7.7] |

\* Outcomes with 10 events or more.

**Table S4I**– Association of health outcomes\* with SARS-CoV-2 infection in unvaccinated individuals during Wild-Type and Alpha variants, 180-360 days post PCR test, age > 60 years.

| Outcome                                | N     | SARS-CoV-2 Positive |                                               | SARS-CoV-2 Negative |                                               | Hazard Ratio<br>95%CI | Q<br>value | Risk Diff/10,000<br>persons |
|----------------------------------------|-------|---------------------|-----------------------------------------------|---------------------|-----------------------------------------------|-----------------------|------------|-----------------------------|
|                                        |       | No.<br>event<br>s   | Absolute<br>risk/10,000<br>persons<br>[95%CI] | No.<br>even<br>ts   | Absolute<br>risk/10,000<br>persons<br>[95%CI] |                       |            |                             |
| Abdominal pain                         | 7,610 | 342                 | 482.4 [429.0-535.8]                           | 384                 | 531.2 [474.1-588.3]                           | 0.91 [0.79-1.05]      | 0.48       | -47.3 [(-125.8)-31.3]       |
| Anosmia and<br>Dysgeusia               | 9,616 | 20                  | 26.5 [14.6-38.5]                              | 15                  | 13.9 [6.7-21.1]                               | 1.91 [1.02-3.58]      | 0.19       | 12.6 [(-1.3)-26.5]          |
| Anxiety                                | 4,803 | 25                  | 58.9 [34.5-83.3]                              | 25                  | 56.1 [33.1-79.2]                              | 1.05 [0.62-1.79]      | 0.97       | 2.8 [(-30.8)-36.3]          |
| Arthralgia                             | 8,650 | 194                 | 242.0 [206.8-277.2]                           | 170                 | 201.0 [169.1-232.9]                           | 1.2 [0.99-1.46]       | 0.23       | 41.0 [(-6.5)-88.5]          |
| Bloody stool                           | 9,493 | 33                  | 37.1 [23.9-50.2]                              | 38                  | 38.8 [25.6-52.1]                              | 0.95 [0.63-1.46]      | 0.96       | -1.8 [(-20.5)-16.9]         |
| Cardiac arrhythmias                    | 6,724 | 44                  | 65.8 [45.7-85.9]                              | 39                  | 58.3 [39.0-77.7]                              | 1.13 [0.79-1.61]      | 0.78       | 7.5 [(-20.4)-35.4]          |
| Cerebral<br>hemorrhage                 | 9,379 | 4                   | 6.5 [0.3-12.7]                                | 7                   | 8.0 [1.9-14.1]                                | 0.81 [0.36-1.83]      | 0.86       | -1.5 [(-10.2)-7.2]          |
| Chest pain                             | 7,994 | 328                 | 445.1 [394.8-495.3]                           | 336                 | 462.0 [407.8-516.1]                           | 0.96 [0.84-1.11]      | 0.86       | -16.9 [(-90.8)-57.0]        |
| Chronic kidney<br>disease              | 7,545 | 27                  | 66.7 [48.2-85.1]                              | 25                  | 81.6 [60.5-102.7]                             | 1.11 [0.28-4.43]      | 0.98       | 3.9 [(-16.8)-24.6]          |
| Concentration and<br>memory impairment | 9,308 | 92                  | 105.7 [83.2-128.2]                            | 93                  | 109.4 [85.4-133.5]                            | 0.97 [0.77-1.21]      | 0.93       | -3.8 [(-36.7)-29.2]         |
| Congestive heart<br>failure            | 8,765 | 23                  | 27.1 [15.5-38.6]                              | 23                  | 30.8 [17.6-43.9]                              | 0.88 [0.6-1.3]        | 0.79       | -3.7 [(-21.2)-13.8]         |
| Conjunctivitis                         | 8,728 | 166                 | 198.6 [166.8-230.3]                           | 177                 | 217.4 [182.4-252.3]                           | 0.91 [0.75-1.12]      | 0.68       | -18.8 [(-66.0)-28.4]        |
| Convulsions                            | 9,420 | 5                   | 4.9 [0.5-9.4]                                 | 7                   | 9.3 [1.6-17.0]                                | 0.48 [0.16-1.47]      | 0.48       | -4.9 [(-13.7)-4.0]          |
| Cough                                  | 7,762 | 327                 | 462.2 [409.7-514.6]                           | 306                 | 439.1 [384.8-493.5]                           | 1.05 [0.91-1.22]      | 0.78       | 23.0 [(-52.5)-98.6]         |
| Depression                             | 5,863 | 30                  | 56.3 [35.2-77.3]                              | 18                  | 31.6 [16.1-47.1]                              | 1.78 [1.0-3.17]       | 0.21       | 24.7 [(-1.5)-50.8]          |
| Diabetes Mellitus                      | 5,271 | 48                  | 92.7 [65.4-120.0]                             | 28                  | 50.9 [31.4-70.4]                              | 1.82 [1.13-2.95]      | 0.10       | 41.8 [8.3-75.4]             |
| Diarrhea                               | 9,636 | 9                   | 9.6 [3.2-16.1]                                | 13                  | 12.0 [5.2-18.8]                               | 0.8 [0.4-1.59]        | 0.80       | -2.4 [(-11.8)-7.0]          |
| Diseases of the<br>nervous system      | 4,274 | 35                  | 95.7 [62.8-128.7]                             | 33                  | 79.3 [50.4-108.2]                             | 1.21 [0.77-1.9]       | 0.70       | 16.5 [(-27.4)-60.3]         |
| Dizziness                              | 8,349 | 264                 | 337.3 [295.0-379.7]                           | 242                 | 315.1 [271.3-358.9]                           | 1.07 [0.91-1.26]      | 0.70       | 22.3 [(-38.7)-83.2]         |
| Dyspnea                                | 8,634 | 276                 | 352.1 [308.8-395.4]                           | 216                 | 251.5 [216.0-286.9]                           | 1.42 [1.2-1.67]       | <0.001     | 105.3 [49.6-160.9]          |
| Epilepsy                               | 9,353 | 5                   | 4.8 [0.5-9.2]                                 | 7                   | 6.5 [1.5-11.4]                                | 0.75 [0.27-2.11]      | 0.85       | -1.6 [(-8.2)-5.0]           |
| Fatty Liver                            | 6,662 | 50                  | 76.8 [54.4-99.1]                              | 50                  | 67.6 [48.4-86.8]                              | 1.14 [0.77-1.67]      | 0.79       | 9.2 [(-20.3)-38.6]          |
| Hair loss                              | 9,480 | 29                  | 36.1 [22.5-49.6]                              | 48                  | 45.6 [32.3-58.8]                              | 0.79 [0.5-1.24]       | 0.61       | -9.5 [(-28.5)-9.4]          |
| Headache                               | 8,366 | 210                 | 268.7 [230.6-306.8]                           | 237                 | 294.3 [254.3-334.3]                           | 0.91 [0.76-1.1]       | 0.63       | -25.6 [(-80.8)-29.7]        |



|                              |       |     |                     |     |                     |                  |      |                        |
|------------------------------|-------|-----|---------------------|-----|---------------------|------------------|------|------------------------|
| Herpes Simplex               | 7,209 | 15  | 24.3 [11.6-37.0]    | 11  | 16.7 [6.2-27.2]     | 1.45 [0.69-3.06] | 0.62 | 7.6 [(-8.9)-24.1]      |
| Herpes Zoster                | 9,419 | 50  | 55.2 [39.3-71.1]    | 71  | 78.1 [58.3-97.8]    | 0.71 [0.51-0.97] | 0.16 | -22.9 [(-48.2)-2.5]    |
| Hospitalization              | 6,872 | 345 | 532.6 [473.8-591.3] | 389 | 599.1 [534.4-663.8] | 0.82 [0.69-0.97] | 0.43 | -57.2 [(-150.9)-36.6]  |
| Hyperreactive Airway Disease | 5,810 | 14  | 22.9 [10.0-35.8]    | 15  | 30.6 [12.3-48.8]    | 0.75 [0.38-1.5]  | 0.71 | -7.6 [(-30.0)-14.7]    |
| Hypertension                 | 1,554 | 24  | 163.8 [97.0-230.6]  | 22  | 155.9 [87.3-224.5]  | 1.05 [0.62-1.78] | 0.97 | 7.8 [(-87.9)-103.6]    |
| Insomnia                     | 9,655 | 3   | 3.0 [-0.5-6.5]      | 10  | 9.9 [3.2-16.7]      | 0.3 [0.08-1.07]  | 0.23 | -7.0 [(-14.6)-0.6]     |
| Invasive pneumococcal        | 9,028 | 7   | 6.1 [1.4-10.8]      | 5   | 6.4 [0.3-12.5]      | 0.96 [0.37-2.49] | 0.99 | -0.3 [(-7.9)-7.4]      |
| Ischemic heart disease       | 6,197 | 35  | 57.0 [37.6-76.4]    | 44  | 75.7 [52.1-99.2]    | 0.75 [0.59-0.96] | 0.14 | -18.6 [(-49.1)-11.9]   |
| Ischemic stroke and TIA      | 8,085 | 22  | 26.8 [15.2-38.5]    | 20  | 22.0 [11.9-32.0]    | 1.22 [0.36-4.2]  | 0.92 | 4.9 [(-10.6)-20.3]     |
| Loss of appetite             | 9,265 | 96  | 117.8 [93.6-142.0]  | 110 | 122.5 [97.6-147.4]  | 0.96 [0.75-1.23] | 0.93 | -4.7 [(-39.4)-30.0]    |
| Lymphadenopathy              | 9,542 | 28  | 31.4 [19.4-43.4]    | 34  | 35.9 [23.4-48.4]    | 0.88 [0.53-1.43] | 0.85 | -4.5 [(-21.8)-12.9]    |
| Muscle atrophy               | 9,613 | 15  | 14.8 [6.9-22.8]     | 13  | 17.3 [7.0-27.7]     | 0.86 [0.53-1.39] | 0.80 | -2.5 [(-15.5)-10.6]    |
| Myalgia                      | 9,001 | 136 | 158.5 [130.8-186.2] | 110 | 122.0 [97.9-146.1]  | 1.3 [1.02-1.66]  | 0.17 | 36.5 [(-0.2)-73.2]     |
| Nausea or vomiting           | 9,291 | 71  | 82.7 [62.7-102.8]   | 108 | 116.9 [93.6-140.2]  | 0.71 [0.53-0.95] | 0.12 | -34.2 [(-64.9)-(-3.4)] |
| Palpitations                 | 9,058 | 149 | 162.9 [135.6-190.2] | 119 | 136.6 [109.8-163.3] | 1.19 [0.95-1.5]  | 0.37 | 26.3 [(-11.9)-64.5]    |
| Paresthesia                  | 9,197 | 109 | 129.8 [104.6-155.0] | 148 | 164.1 [136.0-192.3] | 0.79 [0.63-1.0]  | 0.20 | -34.3 [(-72.2)-3.5]    |
| Parkinsonism                 | 9,267 | 10  | 12.1 [4.3-19.8]     | 11  | 14.3 [5.6-23.0]     | 0.85 [0.34-2.12] | 0.92 | -2.2 [(-13.9)-9.5]     |
| Pericarditis                 | 9,416 | 12  | 13.6 [5.8-21.5]     | 6   | 5.9 [1.1-10.8]      | 2.3 [0.86-6.17]  | 0.30 | 7.7 [(-1.6)-17.0]      |
| Psychosis                    | 9,066 | 12  | 15.2 [6.2-24.1]     | 19  | 19.2 [10.2-28.1]    | 0.79 [0.43-1.46] | 0.75 | -4.0 [(-16.7)-8.7]     |
| Pulmonary disease            | 7,718 | 18  | 27.4 [14.3-40.4]    | 26  | 32.8 [19.5-46.1]    | 0.84 [0.47-1.49] | 0.81 | -5.4 [(-24.0)-13.2]    |
| Respiratory disorders        | 9,230 | 11  | 13.3 [5.2-21.4]     | 8   | 10.8 [2.5-19.1]     | 1.23 [0.63-2.4]  | 0.80 | 2.5 [(-9.1)-14.1]      |
| Respiratory failure          | 9,596 | 6   | 5.5 [0.8-10.2]      | 4   | 4.2 [-0.0-8.4]      | 1.31 [0.37-4.67] | 0.89 | 1.3 [(-5.0)-7.6]       |
| Skin rash                    | 9,395 | 47  | 54.9 [38.6-71.3]    | 56  | 61.9 [44.3-79.4]    | 0.89 [0.61-1.3]  | 0.80 | -7.0 [(-30.9)-17.0]    |
| Sore throat                  | 9,525 | 24  | 24.9 [14.7-35.2]    | 30  | 32.0 [20.3-43.6]    | 0.78 [0.45-1.34] | 0.68 | -7.0 [(-22.5)-8.5]     |
| Streptococcal tonsillitis    | 9,613 | 7   | 7.2 [1.5-13.0]      | 12  | 16.9 [5.9-27.8]     | 0.43 [0.17-1.07] | 0.25 | -9.6 [(-22.0)-2.8]     |
| Tinnitus                     | 9,253 | 109 | 132.4 [106.6-158.2] | 108 | 114.9 [92.4-137.5]  | 1.15 [0.89-1.49] | 0.58 | 17.5 [(-16.8)-51.7]    |
| Tremor                       | 9,476 | 35  | 40.7 [26.8-54.6]    | 47  | 54.2 [37.7-70.7]    | 0.75 [0.51-1.11] | 0.40 | -13.5 [(-35.0)-8.1]    |
| Venous thromboembolism       | 9,436 | 49  | 49.0 [34.4-63.7]    | 46  | 51.9 [35.4-68.4]    | 0.94 [0.69-1.3]  | 0.92 | -2.9 [(-24.9)-19.2]    |
| Visual disturbances          | 9,242 | 81  | 99.2 [76.7-121.8]   | 103 | 119.0 [94.0-144.0]  | 0.83 [0.65-1.08] | 0.42 | -19.8 [(-53.4)-13.8]   |

|                       |       |     |                     |     |                     |                  |      |                       |
|-----------------------|-------|-----|---------------------|-----|---------------------|------------------|------|-----------------------|
| Voice disorder        | 9,493 | 47  | 51.1 [35.9-66.3]    | 42  | 44.7 [29.5-59.8]    | 1.14 [0.76-1.71] | 0.79 | 6.4 [(-15.1)-27.8]    |
| Weakness              | 8,367 | 318 | 416.2 [368.3-464.0] | 292 | 376.7 [329.7-423.7] | 1.1 [0.95-1.28]  | 0.46 | 39.4 [(-27.6)-106.5]  |
| Weight loss           | 9,340 | 82  | 100.8 [78.5-123.1]  | 90  | 96.8 [75.3-118.2]   | 1.04 [0.8-1.36]  | 0.93 | 4.0 [(-26.9)-34.9]    |
| Abdominal pain        | 7,610 | 342 | 482.4 [429.0-535.8] | 384 | 531.2 [474.1-588.3] | 0.91 [0.79-1.05] | 0.48 | -47.3 [(-125.8)-31.3] |
| Anosmia and Dysgeusia | 9,616 | 20  | 26.5 [14.6-38.5]    | 15  | 13.9 [6.7-21.1]     | 1.91 [1.02-3.58] | 0.19 | 12.6 [(-1.3)-26.5]    |
| Anxiety               | 4,803 | 25  | 58.9 [34.5-83.3]    | 25  | 56.1 [33.1-79.2]    | 1.05 [0.62-1.79] | 0.97 | 2.8 [(-30.8)-36.3]    |
| Arthralgia            | 8,650 | 194 | 242.0 [206.8-277.2] | 170 | 201.0 [169.1-232.9] | 1.2 [0.99-1.46]  | 0.23 | 41.0 [(-6.5)-88.5]    |
| Bloody stool          | 9,493 | 33  | 37.1 [23.9-50.2]    | 38  | 38.8 [25.6-52.1]    | 0.95 [0.63-1.46] | 0.96 | -1.8 [(-20.5)-16.9]   |

\* Outcomes with 10 events or more.

**Table S4m**– Age heterogeneity in the association between SARS-CoV-2 and post-acute health outcomes in unvaccinated individuals during Wild-Type and Alpha variants 30-180 days post PCR test.

| <b>Outcome</b>                      | <b>Interaction p-value</b> | <b>Interaction q-value</b> |
|-------------------------------------|----------------------------|----------------------------|
| Anosmia and Dysgeusia               | 0.11                       | 0.31                       |
| Cardiac arrhythmias                 | 0.22                       | 0.56                       |
| Chest pain                          | 0.11                       | 0.31                       |
| Concentration and memory impairment | 0.53                       | 0.67                       |
| Conjunctivitis                      | 0.3                        | 0.65                       |
| Cough                               | 0.03                       | 0.16                       |
| Dizziness                           | 0.51                       | 0.67                       |
| Dyspnea                             | <0.001                     | <0.001                     |
| Hair loss                           | <0.001                     | 0.003                      |
| Myalgia                             | 0.53                       | 0.67                       |
| Palpitations                        | 0.48                       | 0.67                       |
| Respiratory disorders               | 0.34                       | 0.65                       |
| Streptococcal tonsillitis           | 0.04                       | 0.19                       |
| Weakness                            | 0.01                       | 0.10                       |

\*For significant outcomes found in the age analysis 30-180 post PCR test.

**Table S4n**– Age heterogeneity in the association between SARS-CoV-2 and post-acute health outcomes in unvaccinated individuals during Wild-Type and Alpha variants 180-360 days post PCR test.

| <b>Outcome</b>                      | <b>Interaction p-value</b> | <b>Interaction q-value</b> |
|-------------------------------------|----------------------------|----------------------------|
| Anosmia and Dysgeusia               | 0.39                       | 0.66                       |
| Arthralgia                          | 0.29                       | 0.65                       |
| Concentration and memory impairment | 0.03                       | 0.16                       |
| Dizziness                           | 0.82                       | 0.93                       |
| Dyspnea                             | 0.01                       | 0.10                       |
| Palpitations                        | 0.5                        | 0.67                       |
| Sore throat                         | 0.4                        | 0.66                       |
| Streptococcal tonsillitis           | 0.02                       | 0.16                       |
| Weakness                            | 0.45                       | 0.67                       |

\*For significant outcomes found in the age analysis 180-360 days post pct test.

## Analysis by sex

**Table S5a** - Characteristics of the sub cohort of Female vs. Male unvaccinated individuals, during Wild-Type and Alpha variants of the SARS-CoV-2 virus

| Characteristics                               | Female                                             |                                                    | Male                                               |                                                    |
|-----------------------------------------------|----------------------------------------------------|----------------------------------------------------|----------------------------------------------------|----------------------------------------------------|
|                                               | SARS-CoV-2 positive individuals (%)<br>(n= 84,500) | SARS-CoV-2 negative individuals (%)<br>(n= 84,500) | SARS-CoV-2 positive individuals (%)<br>(n= 85,780) | SARS-CoV-2 negative individuals (%)<br>(n= 85,780) |
| Age, Median (IQR) yr                          | 25 (14-43)                                         | 26 (14-44)                                         | 23 (13-41)                                         | 24 (13-41)                                         |
| Age group                                     |                                                    |                                                    |                                                    |                                                    |
| 0-4 yr                                        | 6,006 (7.1%)                                       | 6,006 (7.1%)                                       | 6,323 (7.4%)                                       | 6,323 (7.4%)                                       |
| 5-11 yr                                       | 11,090 (13.1%)                                     | 11,090 (13.1%)                                     | 12,095 (14.1%)                                     | 12,095 (14.1%)                                     |
| 12-18 yr                                      | 13,313 (15.7%)                                     | 13,313 (15.7%)                                     | 15,875 (18.5%)                                     | 15,875 (18.5%)                                     |
| 19-40 yr                                      | 30,222 (35.8%)                                     | 30,222 (35.8%)                                     | 29,654 (34.6%)                                     | 29,654 (34.6%)                                     |
| 41-60 yr                                      | 18,377 (21.7%)                                     | 18,377 (21.7%)                                     | 16,490 (19.2%)                                     | 16,490 (19.2%)                                     |
| >60 yr                                        | 5,492 (6.5%)                                       | 5,492 (6.5%)                                       | 5,343 (6.2%)                                       | 5,343 (6.2%)                                       |
| Sex                                           |                                                    |                                                    |                                                    |                                                    |
| Female                                        | 84,500 (100%)                                      | 84,500 (100%)                                      | 0 (0%)                                             | 0 (0%)                                             |
| Male                                          | 0 (0%)                                             | 0 (0%)                                             | 85,780 (100%)                                      | 85,780 (100%)                                      |
| Dominant strain during positive/negative test |                                                    |                                                    |                                                    |                                                    |
| Wild-Type                                     | 33,837 (40%)                                       | 33,837 (40%)                                       | 38,480 (44.9%)                                     | 38,480 (44.9%)                                     |
| Alpha                                         | 50,663 (60%)                                       | 50,663 (60%)                                       | 47,300 (55.1%)                                     | 47,300 (55.1%)                                     |
| Delta                                         | 0 (0%)                                             | 0 (0%)                                             | 0                                                  | 0                                                  |
| Vaccine status                                |                                                    |                                                    |                                                    |                                                    |
| Unvaccinated                                  | 84,500 (100%)                                      | 84,500 (100%)                                      | 85,780 (100%)                                      | 85,780 (100%)                                      |
| One Vaccine dose                              | 0 (0%)                                             | 0 (0%)                                             | 0 (0%)                                             | 0 (0%)                                             |
| Two Vaccine doses                             | 0 (0%)                                             | 0 (0%)                                             | 0 (0%)                                             | 0 (0%)                                             |
| Booster dose                                  | 0 (0%)                                             | 0 (0%)                                             | 0 (0%)                                             | 0 (0%)                                             |

**Table S5b** - Association of health outcomes with SARS-CoV-2 infection in unvaccinated individuals\*, during Wild-Type and Alpha variants, 30-180 days post PCR test, by sex

| Outcome               | Male   |                     |                                      |                     |                                      |                  |         |                     | Female |                     |                                      |                     |                                      |                  |         |                     | Sex difference Q-value |
|-----------------------|--------|---------------------|--------------------------------------|---------------------|--------------------------------------|------------------|---------|---------------------|--------|---------------------|--------------------------------------|---------------------|--------------------------------------|------------------|---------|---------------------|------------------------|
|                       | N      | SARS-CoV-2 positive |                                      | SARS-CoV-2 negative |                                      | HR (95% CI)      | Q-value | RD/10,000 patients  | N      | SARS-CoV-2 positive |                                      | SARS-CoV-2 negative |                                      | HR (95% CI)      | Q-value | RD/10,000 patients  |                        |
|                       |        | SARS-CoV-2 positive | Absolute risk/10,000 persons [95%CI] | SARS-CoV-2 negative | Absolute risk/10,000 persons [95%CI] |                  |         |                     |        | SARS-CoV-2 positive | Absolute risk/10,000 persons [95%CI] | SARS-CoV-2 negative | Absolute risk/10,000 persons [95%CI] |                  |         |                     |                        |
| Abdominal pain        | 71,922 | 1,687               | 256.4 [240.2-272.7]                  | 1,871               | 265.5 [249.0-282.0]                  | 0.97 [0.91-1.03] | 0.56    | -9.1 [(-32.2)-14.1] | 63,705 | 2,669               | 457.4 [432.3-482.5]                  | 2,800               | 457.6 [432.5-482.7]                  | 1.0 [0.95-1.06]  | 1.00    | -0.2 [(-35.7)-35.3] | 0.95                   |
| Anosmia and Dysgeusia | 81,536 | 135                 | 19.4 [15.2-23.6]                     | 32                  | 4.0 [2.4-5.5]                        | 4.89 [3.39-7.08] | <0.001  | 15.4 [11.0-19.9]    | 80,851 | 209                 | 30.4 [25.0-35.8]                     | 58                  | 7.0 [4.9-9.2]                        | 4.33 [3.19-5.89] | <0.001  | 23.4 [17.6-29.2]    | 0.95                   |
| Anxiety               | 67,171 | 230                 | 38.4 [31.8-45.0]                     | 231                 | 34.9 [28.8-41.0]                     | 1.1 [0.93-1.3]   | 0.56    | 3.5 [(-5.5)-12.6]   | 60,855 | 319                 | 57.7 [48.8-66.6]                     | 310                 | 50.6 [42.5-58.6]                     | 1.14 [0.97-1.34] | 0.33    | 7.2 [(-4.8)-19.1]   | 0.98                   |
| Appendicitis          | 77,012 | 48                  | 7.1 [4.4-9.7]                        | 55                  | 7.3 [4.6-9.9]                        | 0.98 [0.68-1.4]  | 0.99    | -0.2 [(-4.0)-3.6]   | 76,331 | 41                  | 5.9 [3.6-8.3]                        | 50                  | 6.1 [3.8-8.3]                        | 0.98 [0.64-1.5]  | 0.99    | -0.1 [(-3.4)-3.1]   | 1.00                   |
| Arthralgia            | 79,362 | 460                 | 62.4 [55.0-69.7]                     | 474                 | 61.2 [53.9-68.4]                     | 1.02 [0.91-1.15] | 0.92    | 1.2 [(-9.1)-11.5]   | 77,409 | 679                 | 90.6 [81.4-99.9]                     | 596                 | 78.8 [70.3-87.3]                     | 1.15 [1.02-1.29] | 0.11    | 11.8 [(-0.8)-24.4]  | 0.95                   |
| Bloody stool          | 81,260 | 86                  | 10.9 [7.6-14.2]                      | 103                 | 13.4 [9.5-17.3]                      | 0.81 [0.63-1.04] | 0.30    | -2.5 [(-7.7)-2.6]   | 80,720 | 89                  | 12.1 [8.5-15.6]                      | 80                  | 9.9 [6.8-13.0]                       | 1.22 [0.89-1.67] | 0.51    | 2.2 [(-2.5)-6.9]    | 0.95                   |
| Cardiac arrhythmias   | 77,198 | 82                  | 11.7 [8.4-15.1]                      | 83                  | 10.5 [7.4-13.5]                      | 1.12 [0.84-1.49] | 0.73    | 1.2 [(-3.3)-5.8]    | 76,841 | 83                  | 10.8 [7.8-13.9]                      | 69                  | 8.8 [6.1-11.5]                       | 1.23 [0.88-1.72] | 0.51    | 2.0 [(-2.0)-6.1]    | 0.95                   |
| Celiac disease        | 81,435 | 40                  | 4.7 [2.7-6.6]                        | 54                  | 6.6 [4.1-9.1]                        | 0.71 [0.48-1.06] | 0.29    | -1.9 [(-5.1)-1.3]   | 80,616 | 54                  | 7.1 [4.5-9.8]                        | 71                  | 8.7 [5.6-11.7]                       | 0.82 [0.57-1.19] | 0.59    | -1.5 [(-5.6)-2.5]   | 0.95                   |
| Cerebral hemorrhage   | 81,287 | 8                   | 0.9 [0.1-1.8]                        | 10                  | 1.2 [0.2-2.1]                        | 0.8 [0.23-2.75]  | 0.92    | -0.2 [(-1.5)-1.1]   | 80,783 | 4                   | 0.4 [-0.1-0.9]                       | 9                   | 1.0 [0.1-1.8]                        | 0.4 [0.12-1.31]  | 0.37    | -0.6 [(-1.6)-0.4]   | 0.95                   |

|                                     |        |       |                        |       |                        |                     |        |                    |        |       |                        |       |                        |                     |        |                      |      |
|-------------------------------------|--------|-------|------------------------|-------|------------------------|---------------------|--------|--------------------|--------|-------|------------------------|-------|------------------------|---------------------|--------|----------------------|------|
| Chest pain                          | 76,048 | 1,337 | 193.9<br>[179.8-208.0] | 1,089 | 145.3<br>[133.8-156.7] | 1.33<br>[1.25-1.43] | <0.001 | 48.6 [30.5-66.8]   | 75,491 | 1,433 | 205.7<br>[191.4-219.9] | 1,036 | 141.6<br>[130.4-152.8] | 1.45<br>[1.33-1.58] | <0.001 | 64.0 [45.9-82.2]     | 0.95 |
| Chronic kidney disease              | 79,480 | 14    | 4.8 [3.0-6.6]          | 14    | 4.5 [2.7-6.3]          | 1.07<br>[0.71-1.6]  | 0.92   | 0.3 [(-2.2)-2.9]   | 79,619 | 6     | 3.2 [1.8-4.5]          | 9     | 3.5 [1.9-5.0]          | 0.9<br>[0.51-1.6]   | 0.92   | -0.3 [(-2.4)-1.7]    | 0.95 |
| Concentration and memory impairment | 81,301 | 146   | 20.3<br>[16.2-24.5]    | 96    | 12.1 [9.1-15.0]        | 1.69<br>[1.34-2.13] | <0.001 | 8.3 [3.2-13.4]     | 80,484 | 257   | 35.4<br>[29.5-41.2]    | 147   | 18.5<br>[14.7-22.4]    | 1.91<br>[1.54-2.36] | <0.001 | 16.8 [9.9-23.8]      | 0.95 |
| Congestive heart failure            | 80,783 | 27    | 3.5 [1.9-5.1]          | 32    | 4.0 [2.2-5.8]          | 0.88<br>[0.55-1.4]  | 0.85   | -0.5 [(-2.9)-2.0]  | 80,512 | 12    | 1.4 [0.5-2.3]          | 29    | 3.8 [2.0-5.6]          | 0.36<br>[0.18-0.74] | 0.05   | -2.4 [(-4.4)-(-0.4)] | 0.95 |
| Conjunctivitis                      | 74,876 | 1,201 | 167.5<br>[153.7-181.2] | 1,171 | 160.3<br>[147.0-173.7] | 1.04<br>[0.97-1.12] | 0.53   | 7.1 [(-12.0)-26.3] | 73,795 | 1,273 | 180.4<br>[166.0-194.9] | 1,195 | 163.6<br>[150.1-177.1] | 1.1<br>[1.01-1.2]   | 0.13   | 16.8 [(-2.9)-36.6]   | 0.95 |
| Convulsions                         | 77,982 | 34    | 4.7 [2.5-7.0]          | 44    | 5.5 [3.0-7.9]          | 0.86<br>[0.61-1.22] | 0.70   | -0.7 [(-4.0)-2.6]  | 77,938 | 38    | 5.4 [3.0-7.8]          | 37    | 5.2 [2.8-7.5]          | 1.04<br>[0.65-1.69] | 0.97   | 0.2 [(-3.2)-3.6]     | 0.95 |
| Cough                               | 70,019 | 1,858 | 285.4<br>[266.5-304.3] | 1,688 | 250.0<br>[232.9-267.2] | 1.14<br>[1.08-1.21] | <0.001 | 35.4 [9.9-60.9]    | 69,151 | 1,993 | 311.0<br>[291.0-331.0] | 1,910 | 289.5<br>[270.5-308.6] | 1.07<br>[1.01-1.15] | 0.17   | 21.5 [(-6.1)-49.1]   | 0.95 |
| Depression                          | 74,321 | 77    | 11.3<br>[8.2-14.4]     | 112   | 14.8<br>[11.2-18.4]    | 0.76<br>[0.58-0.99] | 0.19   | -3.5 [(-8.3)-1.2]  | 69,080 | 141   | 23.4<br>[18.5-28.4]    | 139   | 20.2<br>[15.8-24.6]    | 1.16<br>[0.91-1.48] | 0.52   | 3.3 [(-3.4)-9.9]     | 0.95 |
| Diabetes Mellitus                   | 75,838 | 95    | 12.8<br>[9.0-16.5]     | 79    | 11.8 [8.2-15.4]        | 1.08<br>[0.86-1.37] | 0.79   | 1.0 [(-4.2)-6.1]   | 76,677 | 88    | 11.7<br>[8.4-15.1]     | 61    | 8.9 [6.0-11.8]         | 1.32<br>[0.93-1.85] | 0.34   | 2.8 [(-1.6)-7.3]     | 0.95 |
| Diarrhea                            | 81,657 | 10    | 1.3 [0.3-2.4]          | 21    | 2.4 [0.8-4.0]          | 0.54<br>[0.33-0.91] | 0.12   | -1.1 [(-3.0)-0.8]  | 81,029 | 7     | 0.9 [0.1-1.8]          | 10    | 1.2 [0.2-2.2]          | 0.78<br>[0.28-2.19] | 0.87   | -0.3 [(-1.6)-1.0]    | 0.95 |
| Diseases of the nervous system      | 71,835 | 143   | 23.0<br>[18.2-27.9]    | 151   | 20.8<br>[16.4-25.2]    | 1.11<br>[0.89-1.37] | 0.66   | 2.2 [(-4.4)-8.7]   | 66,449 | 186   | 29.9<br>[24.2-35.5]    | 175   | 25.5<br>[20.5-30.6]    | 1.17<br>[0.94-1.45] | 0.40   | 4.3 [(-3.2)-11.9]    | 0.97 |
| Diseases of the pleura              | 81,167 | 8     | 1.17<br>[0.15-2.19]    | 9     | 1.09 [0.1-2.07]        | 1.07<br>[0.14-8.22] | 1.00   | 0.1 [(-1.3)-1.5]   |        |       |                        |       |                        |                     |        |                      |      |
| Dizziness                           | 79,335 | 473   | 62.7<br>[55.6-69.8]    | 475   | 63.6<br>[56.4-70.9]    | 0.98<br>[0.87-1.11] | 0.94   | -1.0 [(-11.1)-9.2] | 76,385 | 916   | 127.3<br>[116.0-138.6] | 785   | 105.4<br>[95.4-115.3]  | 1.21<br>[1.09-1.33] | 0.00   | 21.9 [6.8-37.0]      | 0.95 |

|                              |        |       |                        |       |                        |                     |        |                     |        |       |                        |       |                        |                     |        |                     |        |
|------------------------------|--------|-------|------------------------|-------|------------------------|---------------------|--------|---------------------|--------|-------|------------------------|-------|------------------------|---------------------|--------|---------------------|--------|
| Dyspnea                      | 77,952 | 1,317 | 184.5<br>[169.7-199.3] | 846   | 111.5<br>[101.3-121.8] | 1.65<br>[1.54-1.78] | <0.001 | 73.0 [55.0-91.0]    | 77,288 | 1,536 | 215.3<br>[198.9-231.7] | 827   | 110.6<br>[100.5-120.8] | 1.95<br>[1.78-2.13] | <0.001 | 104.7 [85.4-124.0]  | 0.95   |
| Encephalitis                 |        |       |                        |       |                        |                     |        |                     | 81,112 | 4     | 0.6 [(-0.1)-1.3]       | 8     | 0.9[0-1.8]             | 0.66<br>[0.2-2.23]  | 0.78   | -0.3 [(-1.5)-0.9]   |        |
| Epilepsy                     | 79,472 | 19    | 2.4 [1.0-3.8]          | 35    | 4.4 [2.2-6.7]          | 0.54<br>[0.31-0.93] | 0.14   | -2.1 [(-4.7)-0.6]   | 79,092 | 29    | 4.1 [2.0-6.3]          | 26    | 3.1 [1.4-4.8]          | 1.32<br>[0.77-2.27] | 0.61   | 1.0 [(-1.7)-3.8]    | 0.95   |
| Fatty Liver                  | 73,420 | 200   | 30.2<br>[24.7-35.6]    | 189   | 24.8<br>[20.1-29.5]    | 1.22<br>[1.02-1.45] | 0.15   | 5.4 [(-1.8)-12.6]   | 75,081 | 182   | 25.3<br>[20.7-29.9]    | 135   | 18.3<br>[14.5-22.1]    | 1.38<br>[1.1-1.75]  | 0.05   | 7.0 [1.1-12.9]      | 0.95   |
| Guillian-Barre syndrome      |        |       |                        |       |                        |                     |        |                     | 81,128 | 4     | 0.5 [(-0.1)-1.1]       | 9     | 1.1[0.1-2.1]           | 0.46<br>[0.13-1.57] | 0.50   | -0.6 [(-1.7)-0.6]   |        |
| Hair loss                    | 80,766 | 197   | 25.9<br>[21.5-30.2]    | 216   | 26.8<br>[22.3-31.2]    | 0.97<br>[0.8-1.17]  | 0.92   | -0.9 [(-7.1)-5.3]   | 78,629 | 858   | 122.1<br>[110.2-134.0] | 471   | 58.4<br>[51.2-65.5]    | 2.09<br>[1.86-2.35] | <0.001 | 63.7 [49.8-77.6]    | <0.001 |
| Headache                     | 75,141 | 1,083 | 154.8<br>[142.8-166.7] | 1,174 | 161.6<br>[149.3-173.9] | 0.96<br>[0.89-1.03] | 0.56   | -6.8 [(-24.0)-10.4] | 69,809 | 1,764 | 277.0<br>[258.9-295.0] | 1,758 | 259.8<br>[242.5-277.0] | 1.07<br>[0.99-1.14] | 0.25   | 17.2 [(-7.8)-42.2]  | 0.95   |
| Herpes Simplex               | 68,174 | 79    | 12.3<br>[8.6-16.0]     | 85    | 12.1 [8.5-15.6]        | 1.02<br>[0.77-1.36] | 0.98   | 0.3 [(-4.9)-5.4]    | 61,164 | 139   | 25.6<br>[19.2-32.1]    | 112   | 18.1<br>[13.1-23.0]    | 1.42<br>[1.09-1.85] | 0.07   | 7.6 [(-0.6)-15.8]   | 0.95   |
| Herpes Zoster                | 81,152 | 112   | 15.4<br>[11.6-19.2]    | 133   | 15.5<br>[11.8-19.3]    | 0.99<br>[0.81-1.23] | 1.00   | -0.1 [(-5.4)-5.2]   | 80,459 | 136   | 19.5<br>[15.1-23.9]    | 152   | 19.4<br>[15.0-23.8]    | 1.0<br>[0.78-1.28]  | 1.00   | 0.0 [(-6.2)-6.3]    | 1.00   |
| Hospitalization              | 74,534 | 1,086 | 154.8<br>[146.1-164.1] | 1,084 | 147.7<br>[139.1-156.9] | 1.05<br>[0.97-1.14] | 0.51   | 7.1 [(-5.6) -19.8]  | 72,638 | 1,365 | 189.0<br>[179.2-199.3] | 1,208 | 177.7<br>[168.2-187.7] | 1.07<br>[0.99-1.16] | 0.26   | 11.3 [(-2.7) -25.3] | 0.95   |
| Hyperhidrosis                | 81,676 | 20    | 2.8 [1.3-4.4]          | 20    | 2.3 [1.0-3.6]          | 1.22<br>[0.69-2.18] | 0.78   | 0.5 [(-1.5)-2.5]    | 81,031 | 21    | 3.2 [1.6-4.8]          | 32    | 3.4 [1.8-5.0]          | 0.93<br>[0.53-1.64] | 0.93   | -0.2 [(-2.5)-2.0]   | 0.95   |
| Hyperreactive Airway Disease | 46,345 | 178   | 41.4<br>[32.6-50.1]    | 146   | 32.1<br>[24.8-39.3]    | 1.29<br>[1.06-1.56] | 0.07   | 9.3 [(-2.1)-20.7]   | 49,256 | 161   | 33.6<br>[26.3-40.9]    | 150   | 30.3<br>[23.5-37.0]    | 1.11<br>[0.88-1.4]  | 0.68   | 3.3 [(-6.6)-13.3]   | 0.95   |
| Hypertension                 | 68,719 | 134   | 20.7<br>[16.3-25.2]    | 95    | 14.1<br>[10.6-17.6]    | 1.47<br>[1.17-1.86] | 0.01   | 6.7 [1.0-12.3]      | 69,593 | 119   | 18.1<br>[14.1-22.1]    | 112   | 17.3<br>[13.3-21.2]    | 1.05<br>[0.8-1.37]  | 0.92   | 0.8 [(-4.8)-6.4]    | 0.95   |



|                            |        |     |                     |     |                    |                  |        |                    |        |     |                     |     |                    |                  |        |                     |      |
|----------------------------|--------|-----|---------------------|-----|--------------------|------------------|--------|--------------------|--------|-----|---------------------|-----|--------------------|------------------|--------|---------------------|------|
| Insomnia                   | 81,668 | 14  | 1.9 [0.4-3.4]       | 17  | 2.1 [0.6-3.6]      | 0.91 [0.5-1.69]  | 0.93   | -0.2 [(-2.3)-1.9]  | 81,090 | 8   | 1.3 [0.2-2.4]       | 8   | 0.9 [0.1-1.6]      | 1.53 [0.56-4.15] | 0.69   | 0.5 [(-0.9)-1.8]    | 0.95 |
| Invasive pneumococcal      | 78,142 | 22  | 2.8 [1.2-4.5]       | 32  | 4.3 [2.1-6.6]      | 0.65 [0.41-1.05] | 0.26   | -1.5 [(-4.3)-1.3]  | 77,994 | 28  | 3.5 [1.6-5.4]       | 17  | 2.2 [0.8-3.6]      | 1.6 [0.84-3.03]  | 0.40   | 1.3 [(-1.0)-3.6]    | 0.95 |
| Ischemic heart disease     | 77,107 | 76  | 10.7 [7.8-13.6]     | 110 | 14.4 [10.9-17.9]   | 0.74 [0.57-0.96] | 0.14   | -3.7 [(-8.2)-0.9]  | 78,847 | 49  | 6.6 [4.5-8.8]       | 52  | 6.3 [4.3-8.3]      | 1.06 [0.7-1.59]  | 0.93   | 0.4 [(-2.6)-3.3]    | 0.95 |
| Ischemic stroke and TIA    | 80,205 | 21  | 3.1 [1.6-4.6]       | 37  | 4.1 [2.4-5.8]      | 0.75 [0.47-1.2]  | 0.52   | -1.0 [(-3.3)-1.2]  | 79,482 | 22  | 2.8 [1.4-4.1]       | 36  | 4.7 [2.8-6.6]      | 0.59 [0.34-1.04] | 0.25   | -1.9 [(-4.2)-0.4]   | 0.95 |
| Loss of appetite           | 80,442 | 235 | 31.9 [26.5-37.4]    | 287 | 36.0 [30.1-41.9]   | 0.89 [0.76-1.04] | 0.37   | -4.1 [(-12.1)-4.0] | 79,270 | 385 | 53.0 [45.3-60.7]    | 429 | 53.1 [45.4-60.8]   | 1.0 [0.86-1.15]  | 1.00   | -0.1 [(-11.0)-10.8] | 0.95 |
| Lymphadenopathy            | 80,711 | 206 | 29.7 [24.3-35.1]    | 305 | 37.5 [31.3-43.7]   | 0.79 [0.68-0.92] | 0.03   | -7.8 [(-16.0)-0.5] | 79,700 | 275 | 38.8 [32.4-45.3]    | 377 | 47.3 [39.9-54.7]   | 0.82 [0.7-0.97]  | 0.11   | -8.4 [(-18.3)-1.4]  | 0.98 |
| Menstruation abnormalities |        |     |                     |     |                    |                  |        |                    | 42,194 | 383 | 98.6 [85.1-112.1]   | 389 | 96.5 [83.1-109.9]  | 1.02 [0.88-1.19] | 0.93   | 2.1 [(-16.9)-21.1]  |      |
| Muscle atrophy             | 81,627 | 22  | 2.9 [1.3-4.4]       | 31  | 3.7 [1.9-5.4]      | 0.78 [0.48-1.27] | 0.62   | -0.8 [(-3.1)-1.5]  | 81,038 | 61  | 7.7 [4.7-10.7]      | 30  | 3.9 [2.0-5.8]      | 1.96 [1.23-3.13] | 0.04   | 3.8 [0.2-7.4]       | 0.95 |
| Myalgia                    | 79,498 | 478 | 64.8 [57.3-72.3]    | 422 | 55.6 [48.8-62.4]   | 1.17 [1.03-1.31] | 0.09   | 9.2 [(-1.0)-19.4]  | 77,448 | 809 | 111.6 [100.9-122.4] | 664 | 87.9 [78.8-97.0]   | 1.27 [1.14-1.41] | <0.001 | 23.7 [9.6-37.8]     | 0.95 |
| Myocarditis                | 81,708 | 10  | 1.27 [(-0.02)-2.57] | 4   | 0.44 [(-0.13)-1.1] | 2.91 [0.5-16.97] | 0.53   | 0.8 [(-0.6)-2.3]   |        |     |                     |     |                    |                  |        |                     |      |
| Nausea or vomiting         | 79,305 | 438 | 59.6 [52.2-67.0]    | 540 | 68.7 [60.5-76.8]   | 0.87 [0.77-0.98] | 0.11   | -9.0 [(-20.0)-2.0] | 77,121 | 798 | 110.0 [98.4-121.5]  | 800 | 105.3 [94.1-116.4] | 1.04 [0.94-1.16] | 0.69   | 4.7 [(-11.3)-20.8]  | 0.95 |
| Palpitations               | 80,657 | 344 | 45.6 [39.4-51.7]    | 252 | 30.9 [26.2-35.7]   | 1.47 [1.26-1.72] | <0.001 | 14.6 [6.9-22.4]    | 78,682 | 671 | 90.7 [81.1-100.3]   | 482 | 61.8 [54.4-69.2]   | 1.47 [1.3-1.66]  | <0.001 | 28.8 [16.7-40.9]    | 1.00 |
| Paresthesia                | 80,374 | 278 | 37.5 [32.1-42.9]    | 297 | 37.4 [32.0-42.8]   | 1.0 [0.86-1.17]  | 1.00   | 0.1 [(-7.5)-7.7]   | 79,165 | 435 | 59.2 [52.2-66.3]    | 471 | 58.8 [51.8-65.8]   | 1.01 [0.88-1.15] | 0.99   | 0.4 [(-9.5)-10.4]   | 1.00 |

|                           |        |     |                  |     |                  |                  |        |                     |        |     |                   |     |                   |                  |      |                    |      |
|---------------------------|--------|-----|------------------|-----|------------------|------------------|--------|---------------------|--------|-----|-------------------|-----|-------------------|------------------|------|--------------------|------|
| Parkinsonism              | 81,446 | 4   | 0.6 [-0.0-1.2]   | 6   | 0.9 [0.1-1.7]    | 0.67 [0.31-1.42] | 0.59   | -0.3 [(-1.3)-0.7]   | 80,843 | 9   | 1.1 [0.3-2.0]     | 5   | 0.8 [0.0-1.7]     | 1.36 [0.42-4.45] | 0.85 | 0.3 [(-0.9)-1.5]   | 0.95 |
| Pericarditis              | 81,088 | 16  | 2.4 [0.9-3.8]    | 17  | 2.1 [0.8-3.4]    | 1.12 [0.59-2.13] | 0.92   | 0.2 [(-1.7)-2.2]    | 80,670 | 19  | 2.7 [1.2-4.2]     | 11  | 1.3 [0.4-2.2]     | 2.1 [0.98-4.51]  | 0.22 | 1.4 [(-0.4)-3.2]   | 0.95 |
| Psychosis                 | 79,793 | 30  | 3.7 [1.9-5.5]    | 46  | 5.6 [3.2-8.0]    | 0.66 [0.44-0.99] | 0.19   | -1.9 [(-4.9)-1.1]   | 79,696 | 30  | 4.2 [2.3-6.2]     | 28  | 3.3 [1.7-4.9]     | 1.29 [0.74-2.23] | 0.67 | 0.9 [(-1.6)-3.5]   | 0.95 |
| Pulmonary disease         | 78,758 | 31  | 4.9 [2.6-7.2]    | 26  | 3.0 [1.4-4.7]    | 1.62 [0.95-2.76] | 0.26   | -1.0 [(-3.4)-1.3]   | 78,623 | 19  | 2.6 [1.1-4.0]     | 25  | 3.6 [1.7-5.5]     | 0.71 [0.37-1.35] | 0.59 | -1.1 [(-3.5)-1.3]  | 0.95 |
| Respiratory disorders     | 80,795 | 52  | 6.8 [3.9-9.7]    | 26  | 2.9 [1.4-4.4]    | 2.36 [1.64-3.39] | <0.001 | 3.9 [0.7-7.2]       | 80,210 | 45  | 5.7 [3.2-8.2]     | 18  | 2.4 [1.0-3.8]     | 2.36 [1.32-4.25] | 0.03 | 3.3 [0.4-6.2]      | 1.00 |
| Respiratory failure       | 81,629 | 6   | 0.8 [0.0-1.7]    | 4   | 0.5 [-0.1-1.1]   | 1.67 [0.65-4.28] | 0.59   | 0.3 [(-0.7)-1.4]    | 81,031 | 3   | 0.4 [-0.1-1.0]    | 8   | 1.2 [0.2-2.2]     | 0.35 [0.09-1.39] | 0.37 | -0.8 [(-1.9)-0.4]  | 0.95 |
| Rhinorrhea                | 81,570 | 32  | 4.2 [2.2-6.2]    | 36  | 4.7 [2.5-6.9]    | 0.89 [0.56-1.43] | 0.88   | -0.5 [(-3.5)-2.5]   | 80,991 | 35  | 4.2 [2.2-6.2]     | 46  | 5.1 [2.8-7.4]     | 0.82 [0.52-1.29] | 0.69 | -0.9 [(-3.9)-2.1]  | 0.98 |
| Skin rash                 | 78,487 | 508 | 71.5 [62.9-80.1] | 577 | 72.8 [64.3-81.4] | 0.98 [0.88-1.09] | 0.92   | -1.3 [(-13.4)-10.8] | 77,258 | 654 | 93.4 [83.1-103.8] | 745 | 93.4 [83.2-103.6] | 1.0 [0.9-1.12]   | 1.00 | 0.0 [(-14.5)-14.6] | 0.98 |
| Sore throat               | 80,006 | 287 | 35.8 [30.2-41.5] | 290 | 39.3 [33.2-45.5] | 0.91 [0.78-1.06] | 0.53   | -3.5 [(-11.9)-4.9]  | 78,654 | 421 | 54.4 [46.9-61.9]  | 464 | 61.4 [53.2-69.7]  | 0.89 [0.77-1.02] | 0.28 | -7.0 [(-18.2)-4.2] | 0.98 |
| Streptococcal tonsillitis | 77,999 | 675 | 83.3 [74.1-92.5] | 450 | 66.8 [58.6-75.0] | 1.25 [1.13-1.37] | <0.001 | 16.5 [4.2-28.9]     | 76,690 | 814 | 98.6 [88.2-108.9] | 557 | 86.4 [76.5-96.3]  | 1.14 [1.02-1.28] | 0.15 | 12.2 [(-2.2)-26.5] | 0.95 |
| Tinnitus                  | 80,422 | 281 | 38.7 [32.7-44.7] | 306 | 38.8 [32.8-44.8] | 1.0 [0.87-1.15]  | 1.00   | -0.1 [(-8.6)-8.4]   | 79,713 | 330 | 45.4 [38.8-51.9]  | 293 | 37.0 [31.3-42.7]  | 1.22 [1.04-1.44] | 0.10 | 8.3 [(-0.4)-17.0]  | 0.95 |
| Tremor                    | 81,418 | 70  | 9.1 [6.2-12.1]   | 72  | 9.0 [6.1-11.8]   | 1.02 [0.76-1.36] | 0.98   | 0.2 [(-3.9)-4.3]    | 80,822 | 84  | 11.0 [7.8-14.3]   | 71  | 9.0 [6.1-11.8]    | 1.23 [0.88-1.71] | 0.52 | 2.0 [(-2.3)-6.4]   | 0.95 |
| Venous thromboembolism    | 81,391 | 77  | 10.1 [7.3-12.8]  | 91  | 11.6 [8.5-14.6]  | 0.87 [0.68-1.12] | 0.58   | -1.5 [(-5.6)-2.6]   | 80,585 | 134 | 16.2 [12.6-19.9]  | 110 | 16.1 [12.3-19.9]  | 1.01 [0.77-1.32] | 1.00 | 0.1 [(-5.2)-5.4]   | 0.95 |

|                     |        |       |                        |     |                        |                     |        |                    |        |       |                        |       |                        |                     |        |                        |      |
|---------------------|--------|-------|------------------------|-----|------------------------|---------------------|--------|--------------------|--------|-------|------------------------|-------|------------------------|---------------------|--------|------------------------|------|
| Visual disturbances | 80,694 | 181   | 23.1<br>[18.5-27.6]    | 191 | 24.7<br>[19.8-29.6]    | 0.93<br>[0.78-1.12] | 0.76   | -1.6 [(-8.3)-5.0]  | 79,749 | 279   | 36.7<br>[30.5-43.0]    | 253   | 32.7<br>[26.9-38.6]    | 1.12<br>[0.94-1.34] | 0.50   | 4.0 [(-4.6)-12.5]      | 0.95 |
| Voice disorder      | 80,981 | 213   | 25.7<br>[20.5-30.9]    | 156 | 22.4<br>[17.5-27.3]    | 1.15<br>[0.96-1.38] | 0.37   | 3.3 [(-3.8)-10.5]  | 80,138 | 199   | 25.5<br>[20.3-30.7]    | 191   | 23.7<br>[18.8-28.7]    | 1.07<br>[0.87-1.33] | 0.78   | 1.8 [(-5.4)-9.0]       | 0.95 |
| Weakness            | 77,212 | 1,442 | 194.1<br>[180.4-207.8] | 803 | 115.5<br>[105.4-125.6] | 1.68<br>[1.56-1.81] | <0.001 | 78.6 [61.6-95.7]   | 73,617 | 2,239 | 320.6<br>[301.1-340.2] | 1,220 | 176.3<br>[163.2-189.4] | 1.82<br>[1.69-1.96] | <0.001 | 144.3<br>[120.8-167.8] | 0.95 |
| Weight loss         | 81,036 | 131   | 18.0<br>[14.0-22.0]    | 187 | 23.2<br>[18.6-27.9]    | 0.78<br>[0.63-0.95] | 0.10   | -5.2 [(-11.3)-0.9] | 80,199 | 206   | 27.8<br>[22.6-33.0]    | 220   | 26.9<br>[21.9-32.0]    | 1.03<br>[0.85-1.26] | 0.92   | 0.9 [(-6.4)-8.1]       | 0.95 |

\* Outcomes with 10 and more SARS-CoV-2 positive cases in Table S2b

**Table S5c** - Association of health outcomes with SARS-CoV-2 infection in unvaccinated individuals\*, during Wild-Type and Alpha variant, 180-360 days post PCR test, by sex

| Outcome               | Male   |                     |                                      |                     |                                      |                  |         |                      | Female |                     |                                      |                     |                                      |                  |         |                      | Sex difference Q-value |
|-----------------------|--------|---------------------|--------------------------------------|---------------------|--------------------------------------|------------------|---------|----------------------|--------|---------------------|--------------------------------------|---------------------|--------------------------------------|------------------|---------|----------------------|------------------------|
|                       | N      | SARS-CoV-2 positive |                                      | SARS-CoV-2 negative |                                      | HR (95% CI)      | Q-value | RD/10,000 patients   | N      | SARS-CoV-2 positive |                                      | SARS-CoV-2 negative |                                      | HR (95% CI)      | Q-value | RD/10,000 patients   |                        |
|                       |        | SARS-CoV-2 positive | Absolute risk/10,000 persons [95%CI] | SARS-CoV-2 negative | Absolute risk/10,000 persons [95%CI] |                  |         |                      |        | SARS-CoV-2 positive | Absolute risk/10,000 persons [95%CI] | SARS-CoV-2 negative | Absolute risk/10,000 persons [95%CI] |                  |         |                      |                        |
| Abdominal pain        | 65,885 | 1,808               | 319.3 [299.5-339.1]                  | 2,046               | 336.2 [315.9-356.5]                  | 0.95 [0.9-1.01]  | 0.27    | -16.9 [(-45.2)-11.4] | 59,487 | 2,810               | 551.5 [521.7-581.3]                  | 3,058               | 565.9 [535.5-596.3]                  | 0.97 [0.92-1.03] | 0.65    | -14.4 [(-57.0)-28.1] | 0.95                   |
| Anosmia and Dysgeusia | 74,736 | 78                  | 12.2 [8.7-15.7]                      | 30                  | 4.2 [2.4-6.0]                        | 2.9 [1.97-4.29]  | <0.001  | 8.0 [4.1-12.0]       | 75,441 | 130                 | 20.5 [15.7-25.2]                     | 53                  | 7.0 [4.7-9.4]                        | 2.92 [2.08-4.1]  | <0.001  | 13.5 [8.2-18.8]      | 1.00                   |
| Anxiety               | 61,393 | 213                 | 40.5 [33.2-47.8]                     | 233                 | 37.7 [30.9-44.4]                     | 1.08 [0.91-1.27] | 0.69    | 2.9 [(-7.1)-12.8]    | 56,631 | 237                 | 49.9 [41.4-58.4]                     | 287                 | 53.7 [44.9-62.6]                     | 0.93 [0.77-1.11] | 0.71    | -3.8 [(-16.1)-8.4]   | 0.95                   |
| Appendicitis          | 70,654 | 32                  | 4.5 [2.5-6.5]                        | 46                  | 6.9 [4.2-9.7]                        | 0.65 [0.42-1.01] | 0.22    | -2.4 [(-5.8)-1.0]    | 71,248 | 45                  | 7.5 [4.6-10.4]                       | 65                  | 9.6 [6.2-13.0]                       | 0.78 [0.53-1.16] | 0.51    | -2.1 [(-6.6)-2.4]    | 0.95                   |
| Arthralgia            | 72,716 | 467                 | 72.0 [63.6-80.4]                     | 479                 | 67.1 [59.2-75.1]                     | 1.07 [0.95-1.21] | 0.56    | 4.8 [(-6.7)-16.4]    | 72,210 | 750                 | 114.8 [103.5-126.1]                  | 658                 | 95.4 [85.5-105.3]                    | 1.2 [1.08-1.34]  | 0.01    | 19.4 [4.4-34.4]      | 0.95                   |
| Bloody stool          | 74,480 | 99                  | 14.4 [10.3-18.4]                     | 98                  | 14.7 [10.5-18.9]                     | 0.98 [0.77-1.25] | 0.98    | -0.3 [(-6.1)-5.5]    | 75,321 | 93                  | 14.3 [10.4-18.2]                     | 108                 | 14.6 [10.7-18.5]                     | 0.98 [0.73-1.31] | 0.98    | -0.3 [(-5.9)-5.2]    | 1.00                   |
| Cardiac arrhythmias   | 70,739 | 64                  | 9.5 [6.4-12.7]                       | 82                  | 12.3 [8.4-16.1]                      | 0.78 [0.6-1.01]  | 0.23    | -2.7 [(-7.7)-2.2]    | 71,720 | 49                  | 7.7 [5.0-10.4]                       | 55                  | 8.2 [5.3-11.0]                       | 0.94 [0.63-1.42] | 0.93    | -0.5 [(-4.4)-3.5]    | 0.95                   |
| Celiac disease        | 74,647 | 57                  | 7.7 [4.9-10.5]                       | 63                  | 8.7 [5.6-11.7]                       | 0.89 [0.64-1.24] | 0.78    | -1.0 [(-5.1)-3.2]    | 75,234 | 64                  | 9.8 [6.4-13.2]                       | 87                  | 12.6 [8.5-16.6]                      | 0.78 [0.55-1.09] | 0.39    | -2.8 [(-8.1)-2.5]    | 0.95                   |
| Cerebral hemorrhage   | 74,518 | 6                   | 1.2 [0.1-2.3]                        | 9                   | 1.2 [0.2-2.3]                        | 1.0 [0.41-2.43]  | 1.00    | -0.0 [(-1.5)-1.5]    | 75,387 | 4                   | 0.5 [-0.1-1.1]                       | 6                   | 0.9 [0.0-1.8]                        | 0.57 [0.15-2.09] | 0.69    | -0.4 [(-1.4)-0.7]    | 0.95                   |

|                                     |        |       |                     |       |                     |                  |      |                     |        |       |                     |       |                     |                  |        |                    |      |
|-------------------------------------|--------|-------|---------------------|-------|---------------------|------------------|------|---------------------|--------|-------|---------------------|-------|---------------------|------------------|--------|--------------------|------|
| Chest pain                          | 69,634 | 1,214 | 200.7 [185.2-216.2] | 1,286 | 196.2 [181.1-211.3] | 1.02 [0.96-1.09] | 0.78 | 4.5 [(-17.1)-26.2]  | 70,424 | 1,199 | 193.8 [179.3-208.4] | 1,193 | 185.5 [171.3-199.8] | 1.04 [0.96-1.14] | 0.61   | 8.3 [(-12.1)-28.7] | 0.97 |
| Chronic kidney disease              | 72,860 | 33    | 7.4 [4.8-9.9]       | 33    | 8.6 [5.6-11.6]      | 0.86 [0.6-1.23]  | 0.70 | -1.2 [(-5.1)-2.7]   | 74,321 | 18    | 4.6 [2.8-6.5]       | 9     | 3.8 [2.1-5.5]       | 1.2 [0.71-2.02]  | 0.77   | 0.8 [(-1.7)-3.3]   | 0.95 |
| Concentration and memory impairment | 74,513 | 154   | 23.6 [18.8-28.5]    | 113   | 15.8 [12.1-19.5]    | 1.5 [1.21-1.85]  | 0.00 | 7.8 [1.8-13.9]      | 75,105 | 253   | 40.9 [34.0-47.9]    | 163   | 23.3 [18.6-28.1]    | 1.75 [1.42-2.16] | <0.001 | 17.6 [9.2-26.0]    | 0.95 |
| Congestive heart failure            | 74,084 | 20    | 2.9 [1.2-4.5]       | 25    | 3.4 [1.6-5.1]       | 0.85 [0.64-1.13] | 0.56 | -0.5 [(-2.9)-1.9]   | 75,157 | 12    | 1.6 [0.5-2.6]       | 15    | 2.7 [1.0-4.3]       | 0.59 [0.26-1.35] | 0.50   | -1.1 [(-3.0)-0.9]  | 0.95 |
| Conjunctivitis                      | 68,592 | 1,178 | 195.7 [179.4-212.0] | 1,157 | 189.5 [173.5-205.5] | 1.03 [0.96-1.11] | 0.67 | 6.2 [(-16.7)-29.0]  | 68,839 | 1,290 | 216.3 [198.9-233.6] | 1,305 | 212.2 [195.1-229.4] | 1.02 [0.94-1.11] | 0.88   | 4.0 [(-20.4)-28.4] | 0.98 |
| Convulsions                         | 71,503 | 39    | 5.9 [3.0-8.8]       | 33    | 4.9 [2.4-7.3]       | 1.2 [0.82-1.76]  | 0.64 | 1.0 [(-2.8)-4.8]    | 72,770 | 28    | 3.9 [1.8-6.0]       | 24    | 3.9 [1.7-6.0]       | 1.02 [0.57-1.82] | 1.00   | 0.1 [(-2.9)-3.1]   | 0.95 |
| Cough                               | 64,160 | 1,745 | 324.7 [302.7-346.6] | 1,784 | 309.4 [288.3-330.5] | 1.05 [0.99-1.11] | 0.31 | 15.3 [(-15.2)-45.7] | 64,449 | 2,029 | 375.2 [351.0-399.4] | 2,004 | 347.0 [324.3-369.8] | 1.08 [1.01-1.15] | 0.12   | 28.2 [(-5.0)-61.4] | 0.95 |
| Depression                          | 68,003 | 105   | 18.4 [13.9-22.8]    | 107   | 15.5 [11.6-19.4]    | 1.18 [0.92-1.51] | 0.46 | 2.8 [(-3.1)-8.8]    | 64,345 | 121   | 22.1 [17.1-27.2]    | 147   | 23.0 [17.9-28.1]    | 0.96 [0.75-1.24] | 0.92   | -0.9 [(-8.0)-6.3]  | 0.95 |
| Diabetes Mellitus                   | 69,439 | 120   | 18.6 [14.3-22.8]    | 87    | 13.9 [10.3-17.5]    | 1.33 [1.06-1.68] | 0.09 | 4.6 [(-0.9)-10.2]   | 71,552 | 89    | 13.4 [10.0-16.7]    | 76    | 11.6 [8.5-14.8]     | 1.15 [0.83-1.58] | 0.69   | 1.7 [(-2.9)-6.3]   | 0.95 |
| Diarrhea                            | 74,851 | 16    | 2.6 [0.9-4.3]       | 24    | 3.0 [1.2-4.8]       | 0.87 [0.5-1.52]  | 0.87 | -0.4 [(-2.9)-2.1]   | 75,613 | 11    | 1.6 [0.4-2.8]       | 20    | 2.8 [1.0-4.5]       | 0.59 [0.27-1.26] | 0.43   | -1.1 [(-3.2)-1.0]  | 0.95 |
| Diseases of the nervous system      | 65,694 | 135   | 23.6 [18.4-28.8]    | 148   | 23.8 [18.6-28.9]    | 0.99 [0.81-1.22] | 1.00 | -0.2 [(-7.5)-7.1]   | 61,883 | 202   | 35.9 [29.2-42.6]    | 158   | 28.0 [22.1-33.8]    | 1.28 [1.03-1.6]  | 0.15   | 7.9 [(-0.9)-16.8]  | 0.95 |
| Diseases of the pleura              | 74,403 | 9     | 1.35 [(-0.03)-2.74] | 12    | 1.75 [0.03-3.48]    | 0.77 [0.31-1.88] | 1.00 | -0.4 [(-2.6)-1.8]   |        |       |                     |       |                     |                  |        |                    |      |
| Dizziness                           | 72,718 | 546   | 83.6 [74.6-92.5]    | 494   | 74.1 [65.7-82.5]    | 1.13 [1.01-1.26] | 0.17 | 9.5 [(-2.8)-21.8]   | 71,278 | 969   | 151.5 [138.3-164.7] | 861   | 129.9 [118.0-141.8] | 1.17 [1.06-1.29] | 0.02   | 21.6 [3.9-39.4]    | 0.95 |

|                              |        |       |                     |       |                     |                  |        |                        |        |       |                     |       |                     |                  |        |                      |      |
|------------------------------|--------|-------|---------------------|-------|---------------------|------------------|--------|------------------------|--------|-------|---------------------|-------|---------------------|------------------|--------|----------------------|------|
| Dyspnea                      | 71,429 | 964   | 155.0 [140.6-169.3] | 781   | 118.6 [106.8-130.4] | 1.31 [1.21-1.42] | <0.001 | 36.4 [17.8-55.0]       | 72,112 | 1,071 | 172.2 [156.9-187.5] | 859   | 129.8 [117.3-142.2] | 1.33 [1.21-1.46] | <0.001 | 42.4 [22.7-62.1]     | 0.98 |
| Encephalitis                 |        |       |                     |       |                     |                  |        |                        | 75,691 | 4     | 0.6 [(-0.1)-1.3]    | 9     | 1.4 [0.1-2.7]       | 0.41 [0.12-1.45] | 0.42   | -0.8 [(-2.3)-0.7]    |      |
| Epilepsy                     | 72,862 | 24    | 3.4 [1.4-5.4]       | 24    | 3.4 [1.4-5.4]       | 1.0 [0.62-1.63]  | 1.00   | 0.0 [(-2.9)-2.9]       | 73,810 | 23    | 3.3 [1.3-5.2]       | 14    | 2.0 [0.6-3.4]       | 1.64 [0.8-3.39]  | 0.45   | 1.3 [(-1.1)-3.7]     | 0.95 |
| Fatty Liver                  | 67,162 | 161   | 26.8 [21.5-32.0]    | 170   | 27.1 [21.9-32.4]    | 0.99 [0.82-1.19] | 0.98   | -0.4 [(-7.8)-7.1]      | 69,994 | 197   | 32.7 [27.1-38.4]    | 167   | 25.6 [20.8-30.5]    | 1.28 [1.03-1.59] | 0.15   | 7.1 [(-0.4)-14.5]    | 0.95 |
| Hair loss                    | 74,025 | 144   | 23.7 [18.9-28.5]    | 208   | 29.2 [23.9-34.4]    | 0.81 [0.67-0.99] | 0.18   | -5.5 [(-12.6)-1.7]     | 73,346 | 415   | 67.8 [58.6-77.0]    | 495   | 70.3 [61.0-79.6]    | 0.96 [0.84-1.11] | 0.85   | -2.5 [(-15.6)-10.6]  | 0.95 |
| Headache                     | 68,890 | 1,112 | 182.6 [168.4-196.7] | 1,314 | 208.8 [193.3-224.3] | 0.87 [0.81-0.94] | 0.00   | -26.3 [(-47.2)-(-5.3)] | 65,165 | 1,793 | 316.2 [295.4-337.0] | 1,867 | 312.5 [291.8-333.2] | 1.01 [0.94-1.08] | 0.92   | 3.7 [(-25.6)-33.0]   | 0.95 |
| Herpes Simplex               | 62,519 | 83    | 14.1 [9.9-18.3]     | 106   | 18.3 [13.2-23.4]    | 0.77 [0.59-1.0]  | 0.21   | -4.2 [(-10.8)-2.4]     | 57,059 | 134   | 27.1 [20.1-34.1]    | 122   | 22.8 [16.6-28.9]    | 1.19 [0.92-1.55] | 0.46   | 4.3 [(-4.9)-13.6]    | 0.95 |
| Herpes Zoster                | 74,368 | 120   | 17.7 [13.3-22.1]    | 149   | 21.6 [16.6-26.7]    | 0.82 [0.67-1.0]  | 0.21   | -3.9 [(-10.6)-2.7]     | 75,069 | 140   | 20.9 [16.2-25.7]    | 181   | 26.3 [20.7-31.9]    | 0.8 [0.63-1.01]  | 0.22   | -5.4 [(-12.7)-2.0]   | 1.00 |
| Hospitalization              | 68,344 | 991   | 160.5 [150.8-170.8] | 1,140 | 179.9 [169.6-190.8] | 0.90 [0.82-0.98] | 0.07   | -19.4 [(-33.9)-(-4.9)] | 67,896 | 1,419 | 226.8 [215.2-239.0] | 1,284 | 217.2 [205.9-229.1] | 1.04 [0.96-1.12] | 0.63   | 9.6 [(-7.1)-26.2]    | 0.94 |
| Hyperhidrosis                | 74,862 | 10    | 1.5 [0.5-2.6]       | 10    | 1.2 [0.4-2.0]       | 1.28 [0.59-2.78] | 0.80   | 0.3 [(-1.0)-1.7]       | 75,614 | 10    | 1.7 [0.5-2.9]       | 37    | 4.5 [2.6-6.5]       | 0.38 [0.18-0.8]  | 0.08   | -2.8 [(-5.1)-(-0.5)] | 0.95 |
| Hyperreactive Airway Disease | 42,794 | 181   | 49.0 [38.5-59.5]    | 148   | 38.7 [30.0-47.5]    | 1.26 [1.05-1.53] | 0.10   | 10.2 [(-3.4)-23.9]     | 46,083 | 172   | 41.2 [32.3-50.0]    | 154   | 35.9 [27.8-43.9]    | 1.15 [0.91-1.45] | 0.54   | 5.3 [(-6.7)-17.2]    | 0.95 |
| Hypertension                 | 62,743 | 124   | 21.9 [17.1-26.8]    | 120   | 19.8 [15.3-24.3]    | 1.11 [0.89-1.38] | 0.68   | 2.1 [(-4.5)-8.7]       | 64,863 | 113   | 18.8 [14.6-23.1]    | 83    | 13.5 [10.0-17.0]    | 1.4 [1.04-1.88]  | 0.15   | 5.3 [(-0.2)-10.9]    | 0.95 |
| Insomnia                     | 74,854 | 24    | 3.6 [1.4-5.9]       | 26    | 3.9 [1.5-6.2]       | 0.93 [0.66-1.33] | 0.92   | -0.3 [(-3.5)-3.0]      | 75,668 | 13    | 2.5 [0.7-4.2]       | 16    | 2.1 [0.7-3.6]       | 1.16 [0.54-2.48] | 0.91   | 0.3 [(-1.9)-2.6]     | 0.95 |

|                            |        |     |                  |     |                     |                  |      |                     |        |     |                     |     |                     |                  |      |                     |      |
|----------------------------|--------|-----|------------------|-----|---------------------|------------------|------|---------------------|--------|-----|---------------------|-----|---------------------|------------------|------|---------------------|------|
| Invasive pneumococcal      | 71,654 | 28  | 4.1 [1.9-6.2]    | 29  | 4.0 [1.9-6.1]       | 1.01 [0.66-1.54] | 1.00 | 0.0 [(-3.0)-3.1]    | 72,774 | 35  | 5.0 [2.5-7.4]       | 28  | 4.6 [2.1-7.0]       | 1.08 [0.63-1.87] | 0.93 | 0.4 [(-3.1)-3.9]    | 1.00 |
| Ischemic heart disease     | 70,625 | 80  | 12.1 [8.6-15.7]  | 111 | 16.7 [12.3-21.1]    | 0.73 [0.56-0.94] | 0.11 | -4.5 [(-10.2)-1.1]  | 73,596 | 46  | 6.8 [4.5-9.2]       | 54  | 7.5 [5.0-10.0]      | 0.91 [0.61-1.37] | 0.88 | -0.7 [(-4.1)-2.8]   | 0.95 |
| Ischemic stroke and TIA    | 73,507 | 30  | 4.4 [2.5-6.3]    | 27  | 3.8 [2.1-5.5]       | 1.17 [0.75-1.83] | 0.78 | 0.6 [(-1.9)-3.2]    | 74,171 | 24  | 3.2 [1.7-4.6]       | 26  | 3.8 [2.0-5.6]       | 0.83 [0.46-1.51] | 0.80 | -0.6 [(-3.0)-1.7]   | 0.95 |
| Loss of appetite           | 73,740 | 260 | 41.6 [34.7-48.6] | 306 | 43.3 [36.2-50.4]    | 0.96 [0.83-1.11] | 0.85 | -1.7 [(-11.7)-8.2]  | 73,966 | 334 | 52.4 [44.3-60.5]    | 404 | 56.4 [47.9-64.8]    | 0.93 [0.8-1.08]  | 0.65 | -4.0 [(-15.7)-7.7]  | 0.98 |
| Lymphadenopathy            | 73,984 | 223 | 36.7 [30.2-43.3] | 266 | 37.1 [30.7-43.5]    | 0.99 [0.84-1.17] | 0.99 | -0.4 [(-9.5)-8.7]   | 74,376 | 278 | 43.4 [36.2-50.5]    | 392 | 53.8 [45.5-62.0]    | 0.81 [0.69-0.95] | 0.07 | -10.4 [(-21.3)-0.5] | 0.95 |
| Menstruation abnormalities |        |     |                  |     |                     |                  |      |                     | 39,202 | 346 | 102.9 [87.7-118.1]  | 386 | 111 [95-127]        | 0.93 [0.79-1.08] | 0.64 | -8.1 [(-30.1)-14.0] |      |
| Muscle atrophy             | 74,822 | 24  | 3.6 [1.8-5.5]    | 34  | 4.9 [2.6-7.2]       | 0.74 [0.5-1.08]  | 0.34 | -1.3 [(-4.2)-1.7]   | 75,623 | 47  | 6.9 [4.1-9.6]       | 27  | 4.5 [2.3-6.7]       | 1.52 [0.91-2.53] | 0.33 | 2.3 [(-1.2)-5.9]    | 0.95 |
| Myalgia                    | 72,851 | 441 | 68.0 [59.8-76.1] | 465 | 69.2 [61.0-77.4]    | 0.98 [0.87-1.11] | 0.93 | -1.2 [(-12.8)-10.3] | 72,242 | 759 | 118.7 [107.2-130.1] | 719 | 105.7 [95.1-116.4]  | 1.12 [1.01-1.25] | 0.17 | 12.9 [(-2.7)-28.6]  | 0.95 |
| Myocarditis                | 74,891 | 10  | 1.71 [0.22-3.21] | 7   | 0.87 [(-0.05)-1.79] | 1.96 [0.6-6.44]  | 0.56 | 0.8 [(-0.9)-2.6]    |        |     |                     |     |                     |                  |      |                     |      |
| Nausea or vomiting         | 72,670 | 499 | 81.5 [71.9-91.0] | 556 | 81.3 [72.0-90.7]    | 1.0 [0.9-1.12]   | 1.00 | 0.1 [(-13.2)-13.5]  | 71,965 | 872 | 139.6 [125.7-153.5] | 987 | 150.1 [135.4-164.8] | 0.93 [0.84-1.02] | 0.38 | -10.5 [(-30.7)-9.7] | 0.95 |
| Palpitations               | 73,927 | 251 | 37.3 [31.4-43.1] | 247 | 33.9 [28.5-39.2]    | 1.1 [0.93-1.3]   | 0.56 | 3.4 [(-4.5)-11.3]   | 73,413 | 582 | 87.8 [77.7-98.0]    | 526 | 76.1 [67.0-85.3]    | 1.15 [1.02-1.31] | 0.14 | 11.7 [(-2.0)-25.4]  | 0.95 |
| Paresthesia                | 73,658 | 277 | 42.5 [36.3-48.7] | 356 | 48.3 [41.8-54.9]    | 0.88 [0.76-1.01] | 0.26 | -5.9 [(-14.9)-3.2]  | 73,871 | 434 | 66.8 [58.7-74.8]    | 533 | 75.5 [66.8-84.2]    | 0.88 [0.77-1.01] | 0.25 | -8.8 [(-20.6)-3.1]  | 1.00 |
| Parkinsonism               | 74,659 | 10  | 1.4 [0.4-2.5]    | 9   | 1.4 [0.3-2.5]       | 1.05 [0.41-2.69] | 0.99 | 0.1 [(-1.5)-1.6]    | 75,450 | 4   | 0.7 [(-0.1)-1.5]    | 6   | 1.1 [0.1-2.2]       | 0.62 [0.16-2.4]  | 0.77 | -0.4 [(-1.7)-0.8]   | 0.95 |

|                               |            |     |                             |     |                            |                         |      |                         |            |       |                            |     |                            |                         |      |                        |      |
|-------------------------------|------------|-----|-----------------------------|-----|----------------------------|-------------------------|------|-------------------------|------------|-------|----------------------------|-----|----------------------------|-------------------------|------|------------------------|------|
| Pericarditis                  | 74,32<br>2 | 15  | 2.1 [0.8-<br>3.4]           | 18  | 2.3 [1.0-<br>3.7]          | 0.89<br>[0.5-<br>1.58]  | 0.91 | -0.3 [(-2.1)-<br>1.6]   | 75,27<br>0 | 17    | 2.7 [1.2-<br>4.2]          | 8   | 1.1 [0.2-<br>2.0]          | 2.33<br>[0.97-<br>5.59] | 0.22 | 1.5 [(-0.2)-<br>3.3]   | 0.95 |
| Psychosis                     | 73,14<br>0 | 38  | 4.8 [2.6-<br>7.0]           | 45  | 6.8 [3.9-<br>9.7]          | 0.71<br>[0.49-<br>1.01] | 0.23 | -2.0 [(-5.7)-<br>1.7]   | 74,38<br>2 | 17    | 2.3 [1.0-<br>3.7]          | 28  | 4.1 [2.1-<br>6.2]          | 0.56<br>[0.3-<br>1.07]  | 0.26 | -1.8 [(-4.3)-<br>0.7]  | 0.95 |
| Pulmonary<br>disease          | 72,17<br>9 | 35  | 5.5 [3.0-<br>8.0]           | 31  | 4.5 [2.4-<br>6.6]          | 1.22<br>[0.82-<br>1.81] | 0.63 | 1.0 [(-2.3)-<br>4.3]    | 73,33<br>5 | 23    | 4.0 [2.0-<br>6.0]          | 40  | 5.4 [3.1-<br>7.7]          | 0.74<br>[0.43-<br>1.26] | 0.56 | -1.4 [(-4.5)-<br>1.7]  | 0.95 |
| Respiratory<br>disorders      | 74,07<br>1 | 13  | 1.7 [0.4-<br>3.1]           | 17  | 2.8 [0.8-<br>4.7]          | 0.63<br>[0.36-<br>1.11] | 0.33 | -1.0 [(-3.4)-<br>1.4]   | 74,86<br>6 | 17    | 2.7 [0.9-<br>4.6]          | 18  | 2.7 [0.9-<br>4.6]          | 1.01<br>[0.49-<br>2.06] | 1.00 | 0.0 [(-2.6)-<br>2.6]   | 0.95 |
| Respiratory<br>failure        | 74,82<br>3 | 5   | 0.67 [(-<br>0.11)-<br>1.46] | 9   | 1.5 [0.07-<br>2.94]        | 0.45<br>[0.07-<br>2.75] | 0.69 | -0.8 [(-2.5)-<br>0.8]   |            |       |                            |     |                            |                         |      |                        |      |
| Rhinorrhea                    | 74,77<br>2 | 26  | 3.9 [1.9-<br>5.9]           | 35  | 4.8 [2.5-<br>7.1]          | 0.81<br>[0.5-<br>1.32]  | 0.69 | -0.9 [(-4.0)-<br>2.2]   | 75,57<br>8 | 36    | 5.9 [3.1-<br>8.7]          | 34  | 4.6 [2.4-<br>6.9]          | 1.27<br>[0.78-<br>2.08] | 0.63 | 1.3 [(-2.3)-<br>4.8]   | 0.95 |
| Skin rash                     | 71,88<br>6 | 462 | 76.3<br>[66.6-<br>85.9]     | 535 | 78.1<br>[68.5-<br>87.7]    | 0.98<br>[0.87-<br>1.09] | 0.90 | -1.9 [(-15.5)-<br>11.8] | 72,05<br>8 | 627   | 103.7<br>[91.8-<br>115.6]  | 686 | 101.3<br>[89.7-<br>112.9]  | 1.02<br>[0.91-<br>1.15] | 0.90 | 2.4 [(-14.3)-<br>19.0] | 0.95 |
| Sore throat                   | 73,34<br>3 | 318 | 48.5<br>[41.2-<br>55.9]     | 251 | 38.7<br>[32.4-<br>45.0]    | 1.25<br>[1.08-<br>1.46] | 0.03 | 9.8 [0.1-19.5]          | 73,42<br>6 | 479   | 72.4<br>[62.8-<br>82.0]    | 487 | 76.5<br>[66.4-<br>86.7]    | 0.95<br>[0.83-<br>1.08] | 0.70 | -4.1 [(-18.1)-<br>9.8] | 0.95 |
| Streptococcal<br>tonsillitis  | 71,52<br>0 | 978 | 150.3<br>[136.2-<br>164.3]  | 729 | 131.6<br>[118.4-<br>144.8] | 1.14<br>[1.06-<br>1.23] | 0.01 | 18.7 [(-0.6)-<br>37.9]  | 71,58<br>3 | 1,109 | 171.3<br>[155.9-<br>186.8] | 826 | 150.2<br>[135.7-<br>164.7] | 1.14<br>[1.03-<br>1.26] | 0.07 | 21.1 [(-0.1)-<br>42.3] | 1.00 |
| Tinnitus                      | 73,69<br>3 | 275 | 42.4<br>[35.6-<br>49.2]     | 351 | 48.1<br>[40.9-<br>55.3]    | 0.88<br>[0.77-<br>1.01] | 0.26 | -5.7 [(-15.6)-<br>4.2]  | 74,36<br>1 | 272   | 41.9<br>[35.4-<br>48.5]    | 314 | 42.9<br>[36.4-<br>49.5]    | 0.98<br>[0.82-<br>1.16] | 0.93 | -1.0 [(-10.3)-<br>8.3] | 0.95 |
| Tremor                        | 74,62<br>5 | 63  | 8.7 [5.9-<br>11.5]          | 85  | 12.1 [8.5-<br>15.7]        | 0.71<br>[0.53-<br>0.96] | 0.14 | -3.5 [(-8.0)-<br>1.1]   | 75,41<br>9 | 87    | 12.7<br>[9.1-<br>16.3]     | 79  | 11.2<br>[7.9-<br>14.5]     | 1.14<br>[0.82-<br>1.57] | 0.72 | 1.5 [(-3.4)-<br>6.4]   | 0.95 |
| Venous<br>thromboemb<br>olism | 74,60<br>2 | 66  | 9.5 [6.7-<br>12.2]          | 73  | 10.6 [7.6-<br>13.7]        | 0.89<br>[0.67-<br>1.19] | 0.73 | -1.2 [(-5.3)-<br>3.0]   | 75,20<br>1 | 132   | 17.9<br>[13.9-<br>22.0]    | 109 | 17.0<br>[12.9-<br>21.1]    | 1.06<br>[0.8-<br>1.39]  | 0.91 | 1.0 [(-4.8)-<br>6.7]   | 0.95 |
| Visual<br>disturbances        | 73,96<br>0 | 198 | 30.3<br>[24.5-<br>36.1]     | 220 | 31.4<br>[25.5-<br>37.4]    | 0.96<br>[0.82-<br>1.14] | 0.90 | -1.1 [(-9.4)-<br>7.2]   | 74,40<br>9 | 275   | 40.8<br>[33.8-<br>47.7]    | 280 | 41.7<br>[34.5-<br>48.9]    | 0.98<br>[0.82-<br>1.17] | 0.93 | -1.0 [(-11.0)-<br>9.1] | 1.00 |



|                |        |       |                        |     |                        |                     |        |                    |        |       |                        |       |                        |                     |        |                    |      |
|----------------|--------|-------|------------------------|-----|------------------------|---------------------|--------|--------------------|--------|-------|------------------------|-------|------------------------|---------------------|--------|--------------------|------|
| Voice disorder | 74,226 | 219   | 30.0<br>[23.9-36.0]    | 137 | 22.7<br>[17.5-27.9]    | 1.32<br>[1.1-1.59]  | 0.03   | 7.3 [(-0.7)-15.3]  | 74,790 | 224   | 33.6<br>[27.1-40.2]    | 258   | 39.0<br>[31.6-46.4]    | 0.86<br>[0.71-1.04] | 0.37   | -5.4 [(-15.2)-4.5] | 0.95 |
| Weakness       | 70,843 | 1,069 | 160.1<br>[147.0-173.1] | 761 | 119.8<br>[108.8-130.9] | 1.34<br>[1.23-1.45] | <0.001 | 40.2 [23.1-57.3]   | 68,738 | 1,737 | 276.2<br>[257.2-295.2] | 1,346 | 221.8<br>[205.3-238.4] | 1.25<br>[1.15-1.34] | <0.001 | 54.4 [29.1-79.6]   | 0.95 |
| Weight loss    | 74,290 | 141   | 22.7<br>[17.8-27.7]    | 188 | 26.3<br>[20.9-31.6]    | 0.87<br>[0.72-1.05] | 0.37   | -3.5 [(-10.8)-3.8] | 74,844 | 169   | 25.7<br>[20.5-30.9]    | 220   | 29.7<br>[24.0-35.4]    | 0.87<br>[0.7-1.07]  | 0.45   | -4.0 [(-11.7)-3.7] | 1.00 |

\* Outcomes with 10 and more SARS-CoV-2 positive cases in Table S2c

**Table S5d**– Sex heterogeneity in the association between SARS-CoV-2 and post-acute health outcomes in unvaccinated individuals during Wild-Type and Alpha variants 30-180 days post PCR test.

| Outcome                             | Interaction p-value | Interaction q-value |
|-------------------------------------|---------------------|---------------------|
| Anosmia and Dysgeusia               | 0.73                | 0.88                |
| Chest pain                          | 0.3                 | 0.65                |
| Concentration and memory impairment | 0.6                 | 0.74                |
| Cough                               | 0.35                | 0.65                |
| Dizziness                           | 0.07                | 0.22                |
| Dyspnea                             | 0.06                | 0.22                |
| Hair loss                           | <0.001              | <0.001              |
| Hypertension                        | 0.19                | 0.51                |
| Lymphadenopathy                     | 0.83                | 0.93                |
| Muscle atrophy                      | 0.07                | 0.22                |
| Myalgia                             | 0.47                | 0.67                |
| Palpitations                        | 0.97                | 1.00                |
| Respiratory disorders               | 1.00                | 1.00                |
| Streptococcal tonsillitis           | 0.44                | 0.67                |
| Weakness                            | 0.32                | 0.65                |

\*For significant outcomes found in the sex analysis 30-180 days post PCR test.

**Table S5e**– Sex heterogeneity in the association between SARS-CoV-2 and post-acute health outcomes in unvaccinated individuals during Wild-Type and Alpha variants 180-360 days post PCR test.

| Outcome                             | Interaction p-value | Interaction q-value |
|-------------------------------------|---------------------|---------------------|
| Anosmia and Dysgeusia               | 0.99                | 1.00                |
| Arthralgia                          | 0.34                | 0.65                |
| Concentration and memory impairment | 0.48                | 0.67                |
| Dizziness                           | 0.76                | 0.89                |
| Dyspnea                             | 0.87                | 0.95                |
| Headache                            | 0.05                | 0.22                |
| Sore throat                         | 0.06                | 0.22                |
| Streptococcal tonsillitis           | 0.99                | 1.00                |
| Voice disorder                      | 0.03                | 0.16                |

\*For significant outcomes found in the sex analysis 180-360 days post pct test.

## Analysis by SARS-CoV-2 variants: Wild-Type vs. Alpha

**Table S6a** - Characteristics of the sub cohort of SARS-CoV-2 Wild-Type variant vs. Alpha variant, unvaccinated individuals, matched by age and sex

| Characteristics                                | Wild-Type variant                                  |                                                    | Alpha variant                                      |                                                    |
|------------------------------------------------|----------------------------------------------------|----------------------------------------------------|----------------------------------------------------|----------------------------------------------------|
|                                                | SARS-CoV-2 positive individuals (%)<br>(n= 66,207) | SARS-CoV-2 negative individuals (%)<br>(n= 66,207) | SARS-CoV-2 positive individuals (%)<br>(n= 66,207) | SARS-CoV-2 negative individuals (%)<br>(n= 66,207) |
| Age, Median (IQR) yr                           | 27 (16-45)                                         | 28 (17-46)                                         | 27 (16-45)                                         | 27 (16-46)                                         |
| Age group                                      |                                                    |                                                    |                                                    |                                                    |
| 0-4 yr                                         | 3,453 (5.2%)                                       | 3,453 (5.2%)                                       | 3,453 (5.2%)                                       | 3,453 (5.2%)                                       |
| 5-11 yr                                        | 6,734 (10.2%)                                      | 6,734 (10.2%)                                      | 6,734 (10.2%)                                      | 6,734 (10.2%)                                      |
| 12-18 yr                                       | 10,689 (16.1%)                                     | 10,689 (16.1%)                                     | 10,689 (16.1%)                                     | 10,689 (16.1%)                                     |
| 19-40 yr                                       | 24,784 (37.4%)                                     | 24,784 (37.4%)                                     | 24,784 (37.4%)                                     | 24,784 (37.4%)                                     |
| 41-60 yr                                       | 16,098 (24.3%)                                     | 16,098 (24.3%)                                     | 16,098 (24.3%)                                     | 16,098 (24.3%)                                     |
| >60 yr                                         | 4,449 (6.7%)                                       | 4,449 (6.7%)                                       | 4,449 (6.7%)                                       | 4,449 (6.7%)                                       |
| Sex                                            |                                                    |                                                    |                                                    |                                                    |
| Female                                         | 32,300 (48.8%)                                     | 32,300 (48.8%)                                     | 32,300 (48.8%)                                     | 32,300 (48.8%)                                     |
| Male                                           | 33,907 (51.2%)                                     | 33,907 (51.2%)                                     | 33,907 (51.2%)                                     | 33,907 (51.2%)                                     |
| Dominant strain during positive /negative test |                                                    |                                                    |                                                    |                                                    |
| Wild-Type                                      | 66,207 (100%)                                      | 66,207 (100%)                                      | 0 (0%)                                             | 0 (0%)                                             |
| Alpha                                          | 0 (0%)                                             | 0 (0%)                                             | 66,207 (100%)                                      | 66,207 (100%)                                      |
| Delta                                          | 0 (0%)                                             | 0 (0%)                                             | 0 (0%)                                             | 0 (0%)                                             |
| Vaccine status                                 |                                                    |                                                    |                                                    |                                                    |
| Unvaccinated                                   | 66,207 (100%)                                      | 66,207 (100%)                                      | 66,207 (100%)                                      | 66,207 (100%)                                      |
| One Vaccine dose                               | 0 (0%)                                             | 0 (0%)                                             | 0 (0%)                                             | 0 (0%)                                             |
| Two Vaccine doses                              | 0 (0%)                                             | 0 (0%)                                             | 0 (0%)                                             | 0 (0%)                                             |
| Booster dose                                   | 0 (0%)                                             | 0 (0%)                                             | 0 (0%)                                             | 0 (0%)                                             |

**Table S6b** - Association of health outcomes with SARS-CoV-2 infection in unvaccinated individuals, 30-180 days post PCR test, by Wild-Type vs Alpha variants

| Outcome                             | N      | Wild-Type Variant   |                     |                  |         | Alpha Variant       |                     |                  |         | Variant difference Q-value |
|-------------------------------------|--------|---------------------|---------------------|------------------|---------|---------------------|---------------------|------------------|---------|----------------------------|
|                                     |        | SARS-CoV-2 positive | SARS-CoV-2 negative | HR (95% CI)      | Q-value | SARS-CoV-2 positive | SARS-CoV-2 negative | HR (95% CI)      | Q-value |                            |
| Anosmia and Dysgeusia               | 65,376 | 172                 | 42                  | 4.83 [3.44-6.77] | <0.001  | 136                 | 40                  | 4.34 [3.01-6.27] | <0.001  | 0.85                       |
| Arthralgia                          | 60,573 | 486                 | 488                 | 1.1 [0.97-1.24]  | 0.2     | 448                 | 421                 | 1.04 [0.91-1.19] | 0.65    | 0.77                       |
| Chest pain                          | 56,372 | 1,177               | 891                 | 1.49 [1.37-1.62] | <0.001  | 1,054               | 811                 | 1.34 [1.22-1.47] | <0.001  | 0.46                       |
| Concentration and memory impairment | 64,876 | 176                 | 116                 | 1.77 [1.4-2.23]  | <0.001  | 175                 | 97                  | 1.88 [1.47-2.39] | <0.001  | 0.85                       |
| Cough                               | 48,743 | 1,006               | 996                 | 1.01 [0.93-1.11] | 0.83    | 1,278               | 1,164               | 1.09 [1.01-1.18] | 0.04    | 0.51                       |
| Dizziness                           | 59,779 | 570                 | 512                 | 1.22 [1.09-1.38] | 0.002   | 552                 | 502                 | 1.08 [0.96-1.22] | 0.28    | 0.5                        |
| Dyspnea                             | 60,065 | 1,080               | 568                 | 2.11 [1.91-2.34] | <0.001  | 935                 | 534                 | 1.81 [1.63-2.01] | <0.001  | 0.46                       |
| Hair loss                           | 62,929 | 598                 | 374                 | 1.91 [1.68-2.18] | <0.001  | 314                 | 221                 | 1.56 [1.31-1.86] | <0.001  | 0.46                       |
| Myalgia                             | 60,720 | 536                 | 460                 | 1.26 [1.11-1.43] | <0.001  | 547                 | 435                 | 1.28 [1.13-1.45] | <0.001  | 0.92                       |
| Palpitations                        | 62,799 | 455                 | 360                 | 1.42 [1.24-1.63] | <0.001  | 402                 | 263                 | 1.59 [1.36-1.86] | <0.001  | 0.66                       |
| Respiratory disorders               | 64,221 | 47                  | 17                  | 3.1 [1.77-5.45]  | <0.001  | 34                  | 17                  | 2.2 [1.18-4.07]  | 0.02    | 0.74                       |
| Streptococcal tonsillitis           | 59,639 | 324                 | 214                 | 1.18 [0.99-1.4]  | 0.1     | 577                 | 325                 | 1.3 [1.14-1.49]  | <0.001  | 0.74                       |
| Weakness                            | 55,974 | 1,531               | 823                 | 1.85 [1.7-2.01]  | <0.001  | 1,339               | 735                 | 1.77 [1.62-1.93] | <0.001  | 0.75                       |

**Table S6c** - Association of health outcomes with SARS-CoV-2 infection in unvaccinated individuals, 180-360 days post PCR test, by Wild-Type vs Alpha variants

| Outcome                             | N      | Wild-Type Variant   |                     |                  |         | Alpha Variant       |                     |                  |         | Variant difference Q-value |
|-------------------------------------|--------|---------------------|---------------------|------------------|---------|---------------------|---------------------|------------------|---------|----------------------------|
|                                     |        | SARS-CoV-2 positive | SARS-CoV-2 negative | HR (95% CI)      | Q-value | SARS-CoV-2 positive | SARS-CoV-2 negative | HR (95% CI)      | Q-value |                            |
| Anosmia and Dysgeusia               | 59,173 | 116                 | 36                  | 3.53 [2.46-5.07] | <0.001  | 69                  | 36                  | 2.38 [1.58-3.59] | <0.001  | 0.41                       |
| Arthralgia                          | 54,762 | 557                 | 485                 | 1.29 [1.14-1.46] | <0.001  | 441                 | 435                 | 1.08 [0.94-1.23] | 0.33    | 0.41                       |
| Chest pain                          | 50,885 | 914                 | 1,009               | 0.98 [0.9-1.07]  | 0.78    | 939                 | 920                 | 1.07 [0.98-1.18] | 0.18    | 0.41                       |
| Concentration and memory impairment | 58,718 | 191                 | 124                 | 1.88 [1.5-2.35]  | <0.001  | 159                 | 112                 | 1.5 [1.19-1.9]   | 0.001   | 0.41                       |
| Cough                               | 44,094 | 1,171               | 1,260               | 0.99 [0.91-1.07] | 0.83    | 1,167               | 1,123               | 1.06 [0.97-1.15] | 0.26    | 0.48                       |
| Dizziness                           | 54,042 | 643                 | 604                 | 1.17 [1.04-1.3]  | 0.01    | 572                 | 474                 | 1.2 [1.06-1.35]  | 0.008   | 0.9                        |
| Dyspnea                             | 54,299 | 796                 | 654                 | 1.29 [1.17-1.43] | <0.001  | 633                 | 464                 | 1.43 [1.26-1.61] | <0.001  | 0.41                       |
| Hair loss                           | 56,930 | 226                 | 279                 | 0.98 [0.83-1.17] | 0.88    | 219                 | 290                 | 0.89 [0.75-1.05] | 0.23    | 0.63                       |
| Myalgia                             | 54,853 | 509                 | 528                 | 1.07 [0.94-1.2]  | 0.36    | 469                 | 440                 | 1.1 [0.97-1.25]  | 0.2     | 0.9                        |
| Palpitations                        | 56,815 | 343                 | 339                 | 1.13 [0.97-1.31] | 0.17    | 338                 | 278                 | 1.23 [1.05-1.44] | 0.02    | 0.63                       |
| Respiratory disorders               | 58,144 | 17                  | 17                  | 0.92 [0.48-1.76] | 0.85    | 9                   | 11                  | 1.02 [0.42-2.52] | 0.96    | 0.91                       |
| Streptococcal tonsillitis           | 54,075 | 626                 | 443                 | 1.02 [0.9-1.15]  | 0.83    | 662                 | 467                 | 1.24 [1.1-1.39]  | <0.001  | 0.38                       |
| Weakness                            | 50,676 | 1,214               | 898                 | 1.33 [1.22-1.45] | <0.001  | 921                 | 723                 | 1.22 [1.11-1.35] | <0.001  | 0.41                       |

**Figure S3 - Hazard ratio of long COVID health outcomes during the early and the late periods for the wild-type and Alpha SARS-CoV-2**

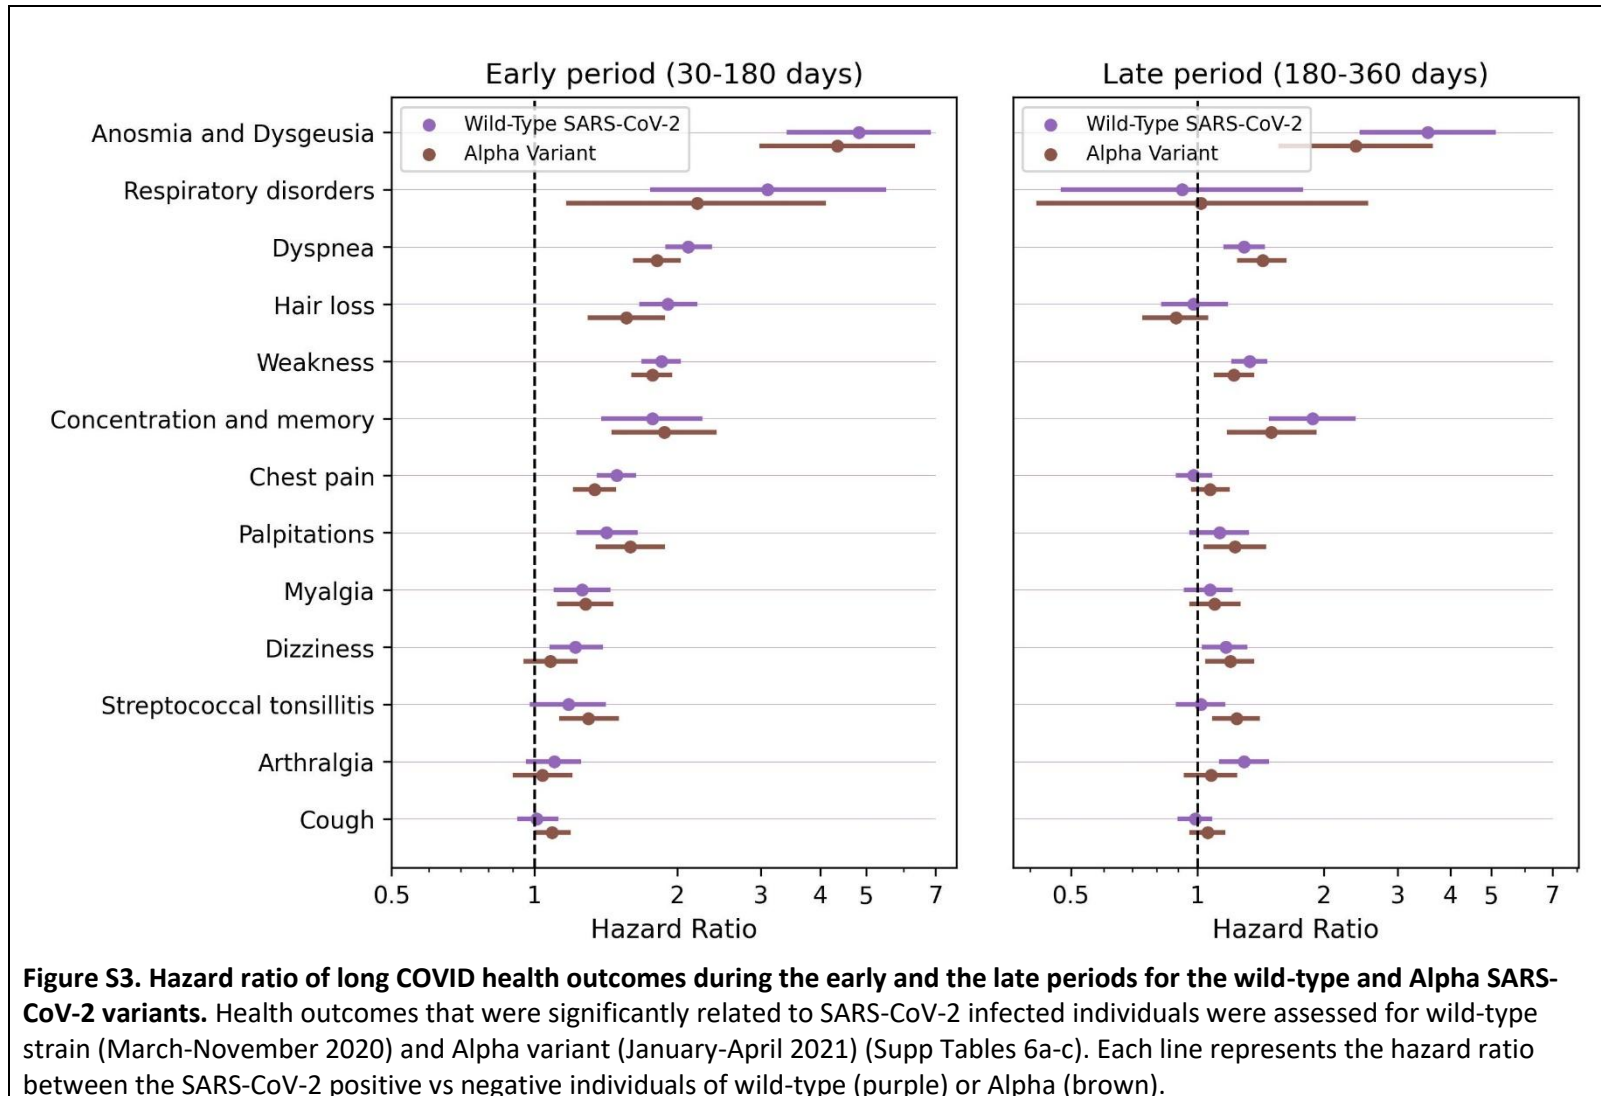

## Analysis by SARS-CoV-2 variants: Wild-Type and Alpha vs. Delta

**Table S7a** - Characteristics of the sub cohort of SARS-CoV-2 Wild-Type/Alpha variant vs. Delta variant, unvaccinated individuals, matched by age and sex

| Characteristics                                | Wild-Type/Alpha variants                           |                                                    | Delta variant                                      |                                                    |
|------------------------------------------------|----------------------------------------------------|----------------------------------------------------|----------------------------------------------------|----------------------------------------------------|
|                                                | SARS-CoV-2 positive individuals (%)<br>(n= 51,562) | SARS-CoV-2 negative individuals (%)<br>(n= 51,562) | SARS-CoV-2 positive individuals (%)<br>(n= 51,562) | SARS-CoV-2 negative individuals (%)<br>(n= 51,562) |
| Age , Median (IQR) yr                          | 9 (5-15)                                           | 10 (6-15)                                          | 9 (5-15)                                           | 10 (6-15)                                          |
| Age group                                      |                                                    |                                                    |                                                    |                                                    |
| 0-4 yr                                         | 10,330 (20.0%)                                     | 10,330 (20.0%)                                     | 10,330 (20.0%)                                     | 10,330 (20.0%)                                     |
| 5-11 yr                                        | 22,362 (43.4%)                                     | 22,362 (43.4%)                                     | 22,362 (43.4%)                                     | 22,362 (43.4%)                                     |
| 12-18 yr                                       | 8,440 (16.4%)                                      | 8,440 (16.4%)                                      | 8,440 (16.4%)                                      | 8,440 (16.4%)                                      |
| 19-40 yr                                       | 6,146 (11.9%)                                      | 6,146 (11.9%)                                      | 6,146 (11.9%)                                      | 6,146 (11.9%)                                      |
| 41-60 yr                                       | 3,433 (6.7%)                                       | 3,433 (6.7%)                                       | 3,433 (6.7%)                                       | 3,433 (6.7%)                                       |
| >60 yr                                         | 851 (1.7%)                                         | 851 (1.7%)                                         | 851 (1.7%)                                         | 851 (1.7%)                                         |
| Sex                                            |                                                    |                                                    |                                                    |                                                    |
| Female                                         | 25,949 (50.3%)                                     | 25,949 (50.3%)                                     | 25,949 (50.3%)                                     | 25,949 (50.3%)                                     |
| Male                                           | 25,613 (49.7%)                                     | 25,613 (49.7%)                                     | 25,613 (49.7%)                                     | 25,613 (49.7%)                                     |
| Dominant strain during positive /negative test |                                                    |                                                    |                                                    |                                                    |
| Wild-Type                                      | 20,073 (38.9%)                                     | 20,073 (38.9%)                                     | 0 (0%)                                             | 0 (0%)                                             |
| Alpha                                          | 31,489 (61.1%)                                     | 31,489 (61.1%)                                     | 0 (0%)                                             | 0 (0%)                                             |
| Delta                                          | 0 (0%)                                             | 0 (0%)                                             | 51,562 (100%)                                      | 51,562 (100%)                                      |
| Vaccine status                                 |                                                    |                                                    |                                                    |                                                    |
| Unvaccinated                                   | 51,562 (100%)                                      | 51,562 (100%)                                      | 51,562 (100%)                                      | 51,562 (100%)                                      |
| One Vaccine dose                               | 0 (0%)                                             | 0 (0%)                                             | 0 (0%)                                             | 0 (0%)                                             |
| Two Vaccine doses                              | 0 (0%)                                             | 0 (0%)                                             | 0 (0%)                                             | 0 (0%)                                             |
| Booster dose                                   | 0 (0%)                                             | 0 (0%)                                             | 0 (0%)                                             | 0 (0%)                                             |



**Table S7b** - Association of health outcomes with SARS-CoV-2 infection in unvaccinated individuals, 30-90 days post PCR test, by Wild-Type/Alpha variants vs. Delta variant

| Outcome                             | N      | Wild-Type/Alpha variants |                     |                  |         | Delta variant       |                     |                   |         | Variant difference Q-value |
|-------------------------------------|--------|--------------------------|---------------------|------------------|---------|---------------------|---------------------|-------------------|---------|----------------------------|
|                                     |        | SARS-CoV-2 positive      | SARS-CoV-2 negative | HR (95% CI)      | Q-value | SARS-CoV-2 positive | SARS-CoV-2 negative | HR (95% CI)       | Q-value |                            |
| Anosmia and Dysgeusia               | 50,846 | 21                       | 8                   | 3.02 [1.34-6.79] | 0.03    | 10                  | 3                   | 3.36 [0.94-12.04] | 0.11    | 0.96                       |
| Arthralgia                          | 49,480 | 69                       | 56                  | 1.34 [0.94-1.91] | 0.16    | 68                  | 50                  | 1.40 [0.97-2.02]  | 0.11    | 0.43                       |
| Chest pain                          | 48,095 | 205                      | 126                 | 1.92 [1.53-2.40] | <0.001  | 184                 | 136                 | 1.31 [1.05-1.63]  | 0.04    | 0.96                       |
| Concentration and memory impairment | 50,689 | 17                       | 12                  | 1.67 [0.81-3.48] | 0.24    | 17                  | 10                  | 1.57 [0.73-3.38]  | 0.34    | 0.96                       |
| Cough                               | 35,129 | 427                      | 439                 | 0.98 [0.86-1.12] | 0.77    | 568                 | 486                 | 1.17 [1.04-1.32]  | 0.03    | 0.96                       |
| Dizziness                           | 49,239 | 64                       | 64                  | 0.93 [0.67-1.31] | 0.72    | 75                  | 82                  | 0.92 [0.68-1.27]  | 0.67    | 0.96                       |
| Dyspnea                             | 45,038 | 280                      | 197                 | 1.46 [1.22-1.75] | <0.001  | 316                 | 244                 | 1.25 [1.06-1.47]  | 0.03    | 0.19                       |
| Hair loss                           | 49,994 | 67                       | 58                  | 1.42 [0.99-2.03] | 0.1     | 103                 | 47                  | 2.31 [1.63-3.27]  | <0.001  | 0.96                       |
| Myalgia                             | 49,332 | 90                       | 70                  | 1.49 [1.09-2.03] | 0.03    | 68                  | 58                  | 1.2 [0.85-1.71]   | 0.37    | 0.43                       |
| Palpitations                        | 50,004 | 70                       | 49                  | 1.53 [1.05-2.22] | 0.05    | 73                  | 45                  | 1.66 [1.14-2.41]  | 0.03    | 0.59                       |
| Respiratory disorders               | 50,176 | 14                       | 3                   |                  |         | 5                   | 2                   |                   |         |                            |
| Streptococcal tonsillitis           | 43,732 | 252                      | 183                 | 1.1 [0.92-1.33]  | 0.37    | 431                 | 328                 | 1.28 [1.11-1.48]  | 0.004   | 0.19                       |
| Weakness                            | 47,942 | 261                      | 115                 | 2.11 [1.7-2.62]  | <0.001  | 209                 | 134                 | 1.35 [1.09-1.67]  | 0.03    | 0.12                       |

**Figure S4-** Hazard ratio of long COVID health outcomes 30-90 days post-infection for the wild-type/Alpha and Delta SARS-CoV-2 variants

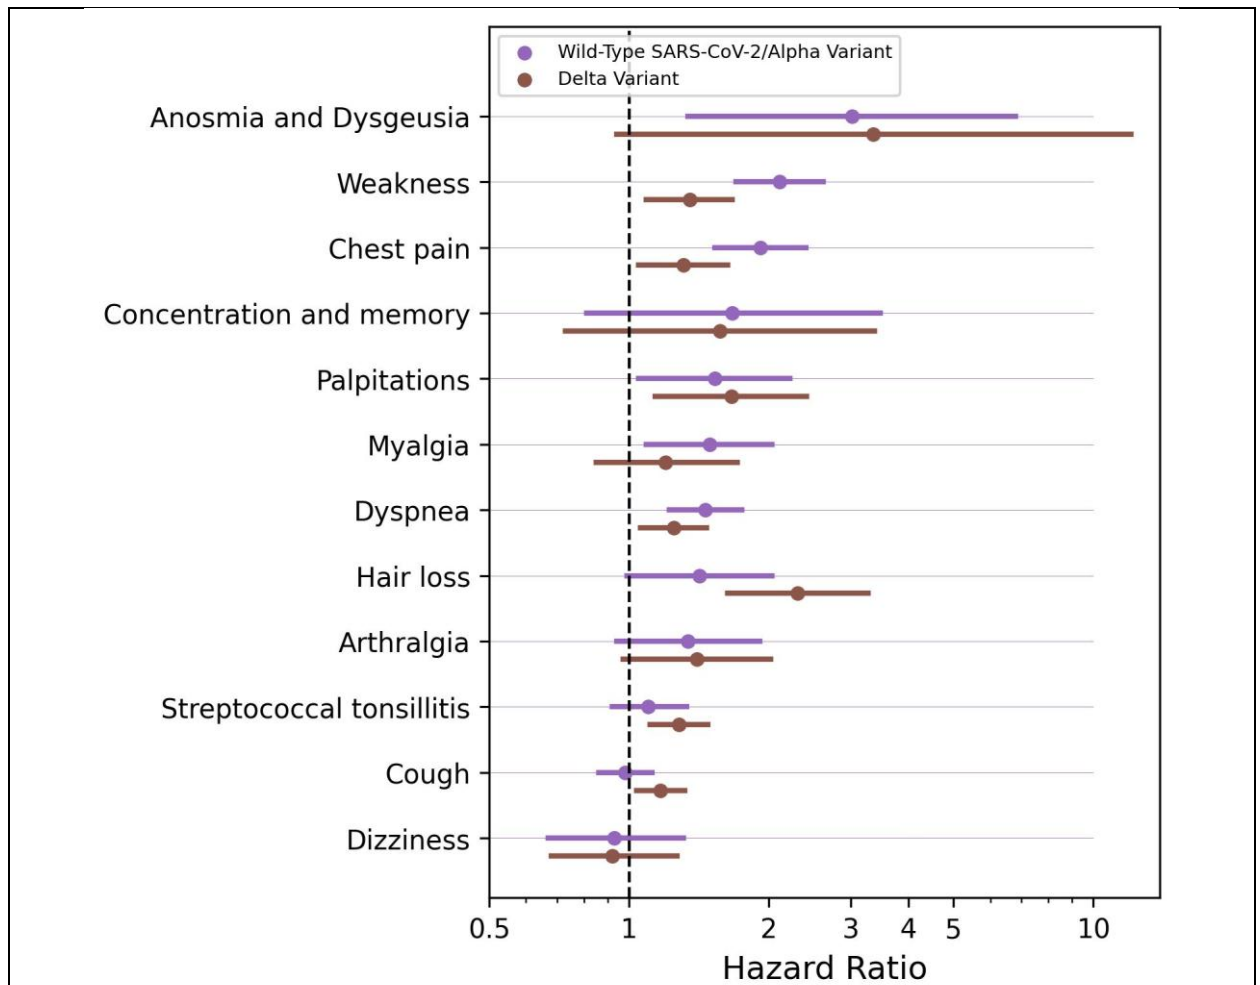

**Figure S4. Hazard ratio of long COVID health outcomes 30-90 days post-infection for the wild-type/Alpha and Delta SARS-CoV-2 variants.**

Health outcomes that were significantly related to SARS-CoV-2 infected individuals were assessed for wild-type/Alpha (March 2020-April 2021) and Delta (July-October 2021) variants (Supp Tables 7a-b).

## Analysis of vaccinated vs. unvaccinated individuals, including old vaccination status (more than three months)

Population: SARS-CoV-2 infected individuals, vaccinated vs. Unvaccinated, from all age groups, during Alpha and Delta variants, with additional match between vaccinated and unvaccinated patients by age and gender.

**\*Patients were considered vaccinated if infection occurred one week after the second dose or after the booster dose.**

**Table S8a** - Characteristics of the sub cohort of SARS-CoV-2 positive individuals, vaccinated (including old status) vs. unvaccinated, during Alpha and Delta variants, with additional match between vaccinated and unvaccinated patients by age and sex

| Characteristics                                | Vaccinated individuals (%)<br>(n=13,348) | Unvaccinated individuals (%)<br>(n=13,348) |
|------------------------------------------------|------------------------------------------|--------------------------------------------|
| Age, Median (IQR) yr                           | 34 (24-47)                               | 34 (24-47)                                 |
| Age group                                      |                                          |                                            |
| 0-4 yr                                         | 0 (0%)                                   | 0 (0%)                                     |
| 5-11 yr                                        | 0 (0%)                                   | 0 (0%)                                     |
| 12-18 yr                                       | 2,005 (15.0%)                            | 2,005 (15.0%)                              |
| 19-40 yr                                       | 6,327 (47.4%)                            | 6,327 (47.4%)                              |
| 41_60 yr                                       | 3,869 (29.0%)                            | 3,869 (29.0%)                              |
| >60 yr                                         | 1,147 (8.6%)                             | 1,147 (8.6%)                               |
| Sex                                            |                                          |                                            |
| Female                                         | 7,458 (55.9%)                            | 7,458 (55.9%)                              |
| Male                                           | 5,890 (44.1%)                            | 5,890 (44.1%)                              |
| Dominant strain during positive /negative test |                                          |                                            |
| Wild-Type                                      | 0 (0%)                                   | 0 (0%)                                     |
| Alpha                                          | 995 (7.5%)                               | 995 (7.5%)                                 |
| Delta                                          | 12,353 (92.5%)                           | 12,353 (92.5%)                             |
| Vaccine status                                 |                                          |                                            |
| Unvaccinated                                   | 0 (0%)                                   | 13,348 (100%)                              |
| One Vaccine dose                               | 0 (0%)                                   | 0 (0%)                                     |
| Two Vaccine doses                              | 12,206 (91.4%)                           | 0 (0%)                                     |
| Booster dose                                   | 1,142 (8.6%)                             | 0 (0%)                                     |

**Table S8b** - Association of health outcomes with SARS-CoV-2 infection in infected individuals, 30-90 days post PCR positive test, during Alpha and Delta variants period, by vaccinated (including old status) vs. unvaccinated status

| Outcome                             | Unvaccinated |        |                                      | Vaccinated |        |                                      | HR [95%CI]       | Q-value | Risk Diff/10,000 persons |
|-------------------------------------|--------------|--------|--------------------------------------|------------|--------|--------------------------------------|------------------|---------|--------------------------|
|                                     | N            | events | Absolute risk/10,000 persons [95%CI] | N          | events | Absolute risk/10,000 persons [95%CI] |                  |         |                          |
| Abdominal pain                      | 8,913        | 151    | 173.2 [147.9-202.8]                  | 8,913      | 145    | 162.9 [138.6-191.4]                  | 1.07 [0.86-1.35] | 0.97    | 10.3 [(-27.8)-48.6]      |
| Anosmia and Dysgeusia               | 13,065       | 10     | 7.7 [4.1-14.4]                       | 13,065     | 11     | 7.9 [4.3-14.6]                       | 0.97 [0.41-2.32] | 0.97    | -0.2 [(-7.8)-7.4]        |
| Anxiety                             | 6,645        | 4      | 7.2 [2.9-17.7]                       | 6,645      | 8      | 10.9 [5.2-22.6]                      | 0.66 [0.21-2.11] | 0.97    | -3.7 [(-16.1)-8.3]       |
| Arthralgia                          | 11,985       | 43     | 37.3 [27.7-50.1]                     | 11,985     | 45     | 36.5 [27.2-49.1]                     | 1.02 [0.67-1.55] | 0.97    | 0.7 [(-15.0)-16.6]       |
| Bloody stool                        | 12,990       | 10     | 10.9 [6.4-18.4]                      | 12,990     | 9      | 6.6 [3.4-12.9]                       | 1.66 [0.71-3.88] | 0.89    | 4.3 [(-3.4)-12.5]        |
| Cardiac arrhythmias                 | 11,458       | 6      | 4.7 [2.0-11.0]                       | 11,458     | 6      | 4.1 [1.7-10.2]                       | 1.31 [0.39-4.37] | 0.97    | 0.6 [(-6.0)-7.3]         |
| Celiac disease                      | 13,051       | 5      | 3.4 [1.3-8.6]                        | 13,051     | 5      | 3.4 [1.3-8.6]                        | 0.99 [0.26-3.75] | 0.99    | -0.0 [(-5.6)-5.6]        |
| Chest pain                          | 11,131       | 104    | 97.4 [80.6-117.6]                    | 11,131     | 120    | 100.5 [83.6-120.9]                   | 0.96 [0.74-1.25] | 0.97    | -3.1 [(-29.5)-23.2]      |
| Concentration and memory impairment | 12,896       | 14     | 9.8 [5.6-17.1]                       | 12,896     | 27     | 21.1 [14.5-30.8]                     | 0.49 [0.26-0.95] | 0.24    | -11.3 [(-21.8)-(-1.5)]   |
| Conjunctivitis                      | 11,719       | 45     | 41.8 [31.5-55.4]                     | 11,719     | 59     | 47.8 [36.8-62.1]                     | 0.86 [0.58-1.26] | 0.97    | -6.0 [(-23.6)-11.5]      |
| Cough                               | 11,204       | 118    | 106.0 [88.5-126.9]                   | 11,204     | 157    | 133.2 [113.6-156.2]                  | 0.81 [0.64-1.03] | 0.43    | -27.2 [(-56.1)-1.5]      |
| Depression                          | 8,915        | 10     | 16.2 [9.7-27.3]                      | 8,915      | 7      | 7.5 [3.5-16.0]                       | 2.18 [0.87-5.48] | 0.43    | 8.8 [(-2.0)-20.5]        |
| Diabetes Mellitus                   | 11,431       | 5      | 4.1 [1.6-10.2]                       | 11,431     | 7      | 5.1 [2.3-11.5]                       | 0.71 [0.22-2.34] | 0.97    | -1.0 [(-7.9)-5.7]        |
| Diseases of the nervous system      | 8,701        | 6      | 7.3 [3.4-16.0]                       | 8,701      | 6      | 6.1 [2.6-14.3]                       | 1.2 [0.38-3.83]  | 0.97    | 1.2 [(-7.9)-10.6]        |
| Dizziness                           | 11,782       | 59     | 51.0 [39.5-65.8]                     | 11,782     | 70     | 58.8 [46.5-74.4]                     | 0.9 [0.64-1.28]  | 0.97    | -7.8 [(-27.2)-11.4]      |
| Dyspnea                             | 12,303       | 110    | 94.2 [78.4-113.0]                    | 12,303     | 75     | 58.5 [46.5-73.7]                     | 1.58 [1.18-2.12] | 0.04    | 35.6 [13.8-58.0]         |
| Fatty Liver                         | 10,474       | 10     | 12.8 [7.5-22.0]                      | 10,474     | 8      | 8.7 [4.6-16.7]                       | 1.47 [0.63-3.42] | 0.97    | 4.1 [(-5.5)-14.2]        |
| Hair loss                           | 12,395       | 75     | 56.0 [44.1-70.9]                     | 12,395     | 48     | 38.5 [29.0-51.1]                     | 1.56 [1.09-2.25] | 0.16    | 17.5 [0.2-35.2]          |
| Headache                            | 10,095       | 99     | 99.4 [81.6-121.0]                    | 10,095     | 111    | 109.5 [90.9-131.8]                   | 0.93 [0.71-1.22] | 0.97    | -10.1 [(-38.6)-18.4]     |
| Herpes Simplex                      | 7,477        | 4      | 4.1 [1.3-12.7]                       | 7,477      | 6      | 6.8 [2.8-16.2]                       | 0.61 [0.15-2.54] | 0.97    | -2.7 [(-12.5)-6.8]       |
| Herpes Zoster                       | 12,896       | 8      | 6.2 [3.1-12.5]                       | 12,896     | 8      | 6.5 [3.3-12.8]                       | 0.89 [0.34-2.32] | 0.97    | -0.3 [(-7.3)-6.8]        |
| Hypertension                        | 9,503        | 4      | 4.2 [1.6-11.3]                       | 9,503      | 7      | 6.7 [3.1-14.5]                       | 0.63 [0.18-2.22] | 0.97    | -2.4 [(-10.7)-5.5]       |
| Ischemic heart disease              | 11,994       | 5      | 4.3 [1.8-10.3]                       | 11,994     | 7      | 4.7 [2.1-10.8]                       | 0.91 [0.27-3.01] | 0.97    | -0.4 [(-7.0)-6.1]        |
| Loss of appetite                    | 12,566       | 30     | 22.2 [15.3-32.2]                     | 12,566     | 14     | 10.0 [5.8-17.4]                      | 2.34 [1.21-4.54] | 0.16    | 12.2 [2.0-23.1]          |
| Lymphadenopathy                     | 12,752       | 15     | 11.7 [7.0-19.5]                      | 12,752     | 20     | 14.4 [9.1-22.8]                      | 0.76 [0.39-1.5]  | 0.97    | -2.7 [(-12.3)-6.7]       |
| Menstruation abnormalities          | 7,073        | 6      | 7.2 [3.0-17.3]                       | 7,073      | 7      | 10.9 [5.4-22.0]                      | 0.89 [0.32-2.51] | 0.97    | -3.7 [(-15.6)-7.8]       |

|                           |        |     |                     |        |     |                     |                  |      |                        |
|---------------------------|--------|-----|---------------------|--------|-----|---------------------|------------------|------|------------------------|
| Myalgia                   | 11,912 | 47  | 38.1 [28.5-51.1]    | 11,912 | 46  | 36.6 [27.2-49.2]    | 1.13 [0.75-1.7]  | 0.97 | 1.6 [(-14.4)-17.6]     |
| Nausea or vomiting        | 12,336 | 35  | 33.4 [24.5-45.4]    | 12,336 | 41  | 32.2 [23.6-43.9]    | 1.04 [0.67-1.61] | 0.97 | 1.2 [(-13.5)-16.0]     |
| Palpitations              | 12,403 | 52  | 42.4 [32.3-55.6]    | 12,403 | 41  | 32.1 [23.5-43.7]    | 1.35 [0.9-2.04]  | 0.6  | 10.3 [(-5.1)-26.1]     |
| Paresthesia               | 12,382 | 30  | 24.8 [17.3-35.4]    | 12,382 | 34  | 25.7 [18.1-36.3]    | 0.97 [0.59-1.59] | 0.97 | -0.9 [(-13.9)-12.1]    |
| Skin rash                 | 12,543 | 29  | 26.1 [18.4-36.8]    | 12,543 | 32  | 25.1 [17.7-35.6]    | 1.04 [0.64-1.7]  | 0.97 | 0.9 [(-12.0)-14.0]     |
| Sore throat               | 12,631 | 23  | 17.1 [11.2-26.2]    | 12,631 | 23  | 20.8 [14.2-30.4]    | 0.82 [0.46-1.46] | 0.97 | -3.7 [(-15.0)-7.6]     |
| Streptococcal tonsillitis | 12,804 | 26  | 20.9 [14.3-30.6]    | 12,804 | 34  | 30.2 [22.0-41.4]    | 0.66 [0.4-1.08]  | 0.43 | -9.3 [(-22.3)-3.4]     |
| Tinnitus                  | 12,513 | 26  | 20.1 [13.6-29.9]    | 12,513 | 23  | 19.0 [12.7-28.4]    | 1.03 [0.59-1.81] | 0.97 | 1.1 [(-10.3)-12.7]     |
| Tremor                    | 13,027 | 4   | 2.6 [0.9-7.6]       | 13,027 | 7   | 5.4 [2.6-11.3]      | 0.48 [0.13-1.78] | 0.91 | -2.8 [(-8.9)-3.0]      |
| Venous thromboembolism    | 12,975 | 11  | 8.0 [4.4-14.8]      | 12,975 | 13  | 9.6 [5.5-16.8]      | 0.83 [0.37-1.91] | 0.97 | -1.6 [(-9.6)-6.3]      |
| Visual disturbances       | 12,737 | 16  | 14.3 [9.0-22.8]     | 12,737 | 22  | 15.1 [9.6-23.6]     | 0.96 [0.5-1.82]  | 0.97 | -0.7 [(-10.7)-9.3]     |
| Voice disorder            | 12,889 | 11  | 10.0 [5.8-17.4]     | 12,889 | 26  | 20.6 [14.1-30.1]    | 0.49 [0.25-0.95] | 0.24 | -10.6 [(-21.0)-(-0.8)] |
| Weakness                  | 11,160 | 141 | 128.2 [108.7-151.0] | 11,160 | 149 | 130.4 [111.0-153.2] | 0.99 [0.79-1.25] | 0.97 | -2.2 [(-32.2)-27.8]    |
| Weight loss               | 12,769 | 29  | 21.5 [14.8-31.4]    | 12,769 | 7   | 5.7 [2.8-11.8]      | 3.99 [1.77-9.0]  | 0.05 | 15.8 [6.7-26.1]        |

\* Outcomes with 10 events or more.

## Analysis of vaccinated vs. unvaccinated individuals, excluding old vaccination status (more than three months)

Population: SARS-CoV-2 infected individuals, vaccinated vs. unvaccinated, during Alpha and Delta variants, with additional match between vaccinated and unvaccinated patients by age and gender.

\* Patients were considered vaccinated if infection occurred one week till three months after the second dose or one week after booster dose.

**Table S9a** - Characteristics of the sub cohort of SARS-CoV-2 infected individuals, vaccinated vs. unvaccinated, during Alpha and Delta variants, with additional match between vaccinated (excluding old status) and unvaccinated patients by age and sex

| Characteristics                  | SARS-CoV-2 positive vaccinated individuals (%)<br>(n= 5,641) | SARS-CoV-2 positive unvaccinated individuals (%)<br>(n= 5,641) |
|----------------------------------|--------------------------------------------------------------|----------------------------------------------------------------|
| Age, Median (IQR) yr             | 43 (27-56)                                                   | 43 (27-56)                                                     |
| Age group                        |                                                              |                                                                |
| 0-4 yr                           | 0 (0%)                                                       | 0 (0%)                                                         |
| 5-11 yr                          | 0 (0%)                                                       | 0 (0%)                                                         |
| 12-18 yr                         | 1,043 (18.5%)                                                | 1,043 (18.5%)                                                  |
| 19-40 yr                         | 1,478 (26.2%)                                                | 1,478 (26.2%)                                                  |
| 41-60 yr                         | 2,124 (37.7%)                                                | 2,124 (37.7%)                                                  |
| >60 yr                           | 996 (17.7%)                                                  | 996 (17.7%)                                                    |
| Sex                              |                                                              |                                                                |
| Female                           | 3,072 (54.5%)                                                | 3,072 (54.5%)                                                  |
| Male                             | 2,569 (45.5%)                                                | 2,569 (45.5%)                                                  |
| Dominant variant during PCR test |                                                              |                                                                |
| Wild-Type                        | 0 (0%)                                                       | 0 (0%)                                                         |
| Alpha                            | 995 (17.6%)                                                  | 995 (17.6%)                                                    |
| Delta                            | 4,646 (82.4%)                                                | 4,646 (82.4%)                                                  |
| Vaccine status                   |                                                              |                                                                |
| Unvaccinated                     | 0 (0%)                                                       | 5,641 (100%)                                                   |
| One Vaccine dose                 | 0 (0%)                                                       | 0 (0%)                                                         |
| Two Vaccine doses                | 2,379 (42.2%)                                                | 0 (0%)                                                         |
| Booster dose                     | 3,262 (57.8%)                                                | 0 (0%)                                                         |

**Table S9b** - Association of health outcomes with SARS-CoV-2 infection in infected individuals, 30-90 days post PCR positive test, during Alpha and Delta variants period, by vaccinated (excluding old status) vs. unvaccinated status

| Outcome                             | Unvaccinated |            | Vaccinated |            | HR [95% CI]      | Q-value | Risk Diff/10,000 persons |
|-------------------------------------|--------------|------------|------------|------------|------------------|---------|--------------------------|
|                                     | N            | No. events | N          | No. events |                  |         |                          |
| Anosmia and Dysgeusia               | 6,438        | 5          | 6,438      | 7          | 0.89 [0.27-2.94] | 0.91    | -1.1 [(-15.3)-13.2]      |
| Arthralgia                          | 4,982        | 14         | 4,982      | 21         | 0.71 [0.34-1.48] | 0.64    | -10.2 [(-33.5) -12.6]    |
| Chest pain                          | 4,597        | 44         | 4,597      | 55         | 0.85 [0.57-1.26] | 0.64    | -18.7 [(-61.4)-23.9]     |
| Concentration and memory impairment | 5,436        | 9          | 5,436      | 13         | 0.65 [0.27-1.57] | 0.64    | -8.3 [(-26.9)-9.7]       |
| Cough                               | 4,657        | 53         | 4,657      | 80         | 0.78 [0.55-1.12] | 0.64    | -33.9 [(-81.4)-13.1]     |
| Dizziness                           | 4,897        | 27         | 4,897      | 32         | 0.80 [0.48-1.35] | 0.64    | -14.5 [(-46.2)-16.9]     |
| Dyspnea                             | 5,145        | 52         | 5,145      | 36         | 1.88 [1.19-2.98] | 0.08    | 47.1 [13.1-82.9]         |
| Hair loss                           | 5,302        | 25         | 5,302      | 12         | 2.05 [1.07-3.93] | 0.19    | 22.4 [(-1.3)-47.7]       |
| Myalgia                             | 5,031        | 17         | 5,031      | 21         | 0.80 [0.41-1.57] | 0.69    | -9.7 [(-34.0)-14.2]      |
| Palpitations                        | 5,223        | 26         | 5,223      | 19         | 1.27 [0.70-2.31] | 0.64    | 7.8 [(-17.8)-34.1]       |
| Respiratory disorders               | 5,392        | 2          | 5,392      | 1          |                  |         |                          |
| Streptococcal tonsillitis           | 5,419        | 16         | 5,419      | 15         | 1.04 [0.52-2.05] | 0.91    | 4.8 [(-16.7)-26.9]       |
| Weakness                            | 4,715        | 63         | 4,715      | 58         | 0.95 [0.66-1.36] | 0.91    | -4.9 [(-50.6)-40.9]      |
